# Supplementary material for: On the Reaction Mechanism of the Rhodium‐Catalyzed Arylation of Fullerene (C60) with Organoboron Compounds in the Presence of Water
Source: PubMed Central journal article supplement — ChemistryOpen. 2015 Jul 6;4(6):774–8. doi: 10.1002/open.201500093 (PMC4906499; doi:10.1002/open.201500093), 2015-07-06
Supplement: OPEN-4-774-s001.pdf [file OPEN-4-774-s001.pdf]

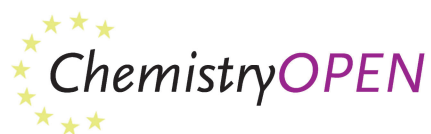

## Supporting Information

© 2015 The Authors. Published by Wiley-VCH Verlag GmbH & Co. KGaA, Weinheim

### **On the Reaction Mechanism of the Rhodium-Catalyzed Arylation of Fullerene (C<sub>60</sub>) with Organoboron Compounds in the Presence of Water**

Juan Pablo Martínez, Miquel Solà, and Albert Poater<sup>\*[a]</sup>

open\_201500093\_sm\_miscellaneous\_information.pdf

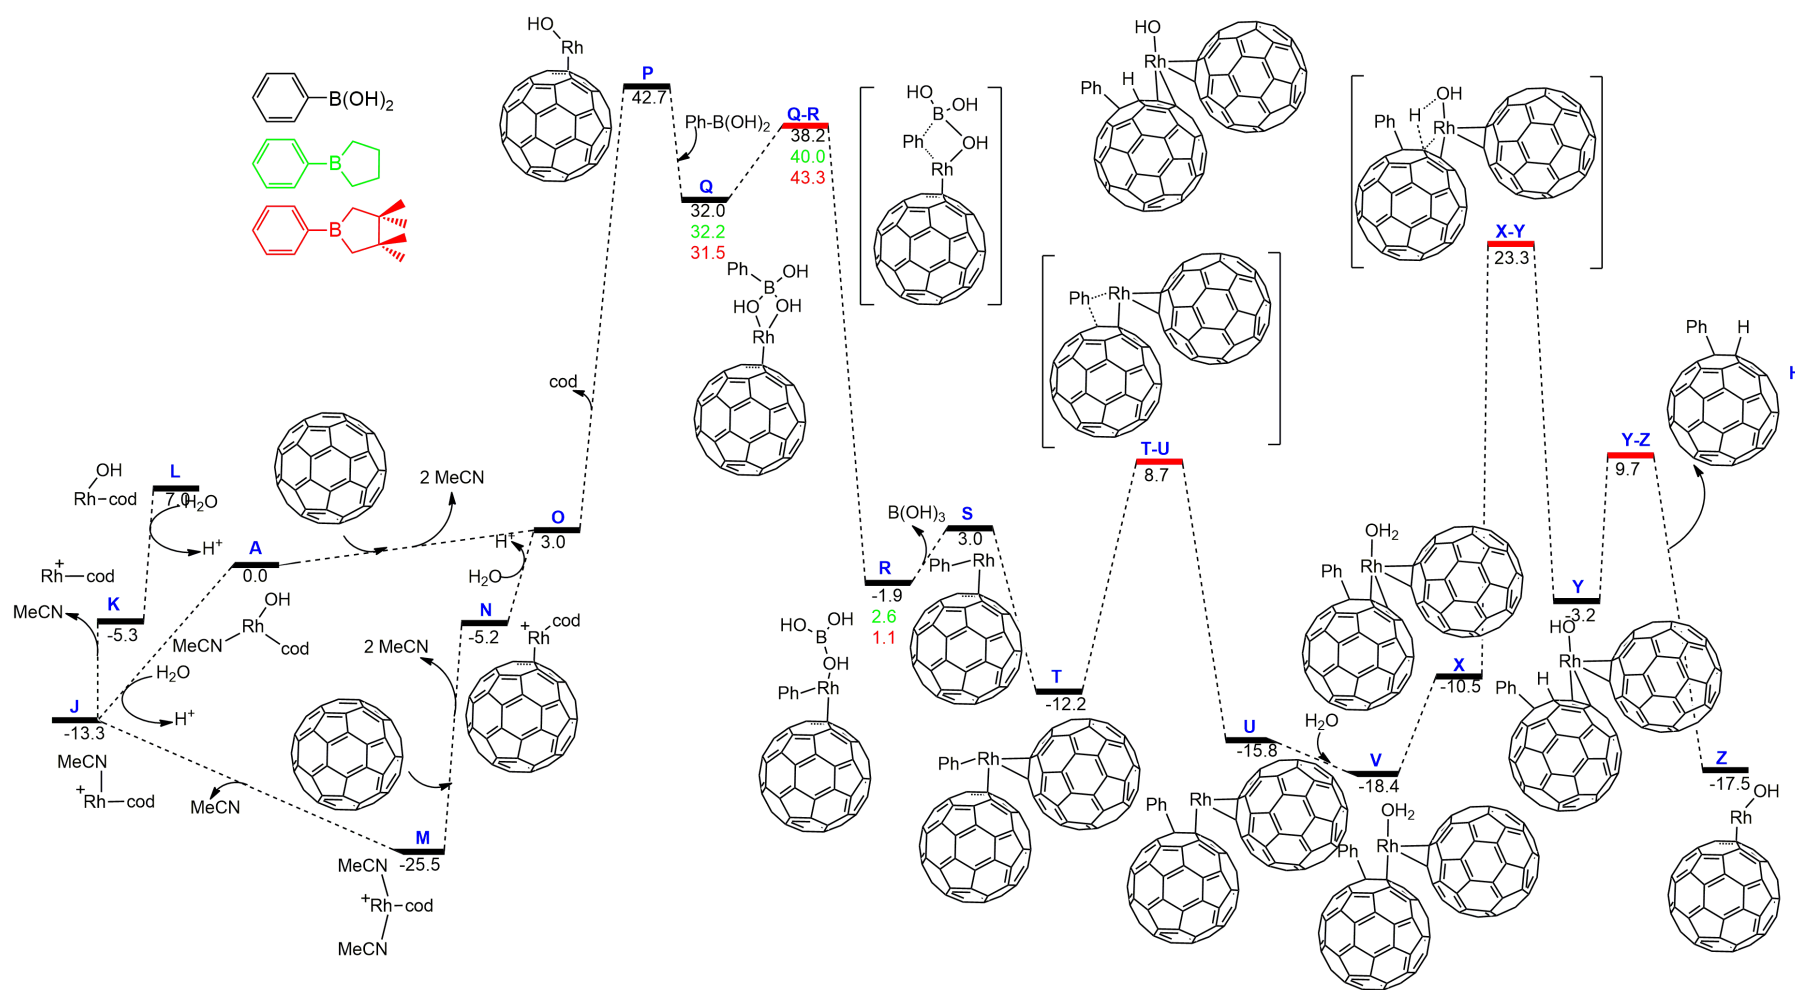

**Figure S1.** Alternative reaction pathways for the addition of phenyl groups or its derivatives to fullerene (C<sub>60</sub>) catalyzed by rhodium in water (energies in kcal/mol).

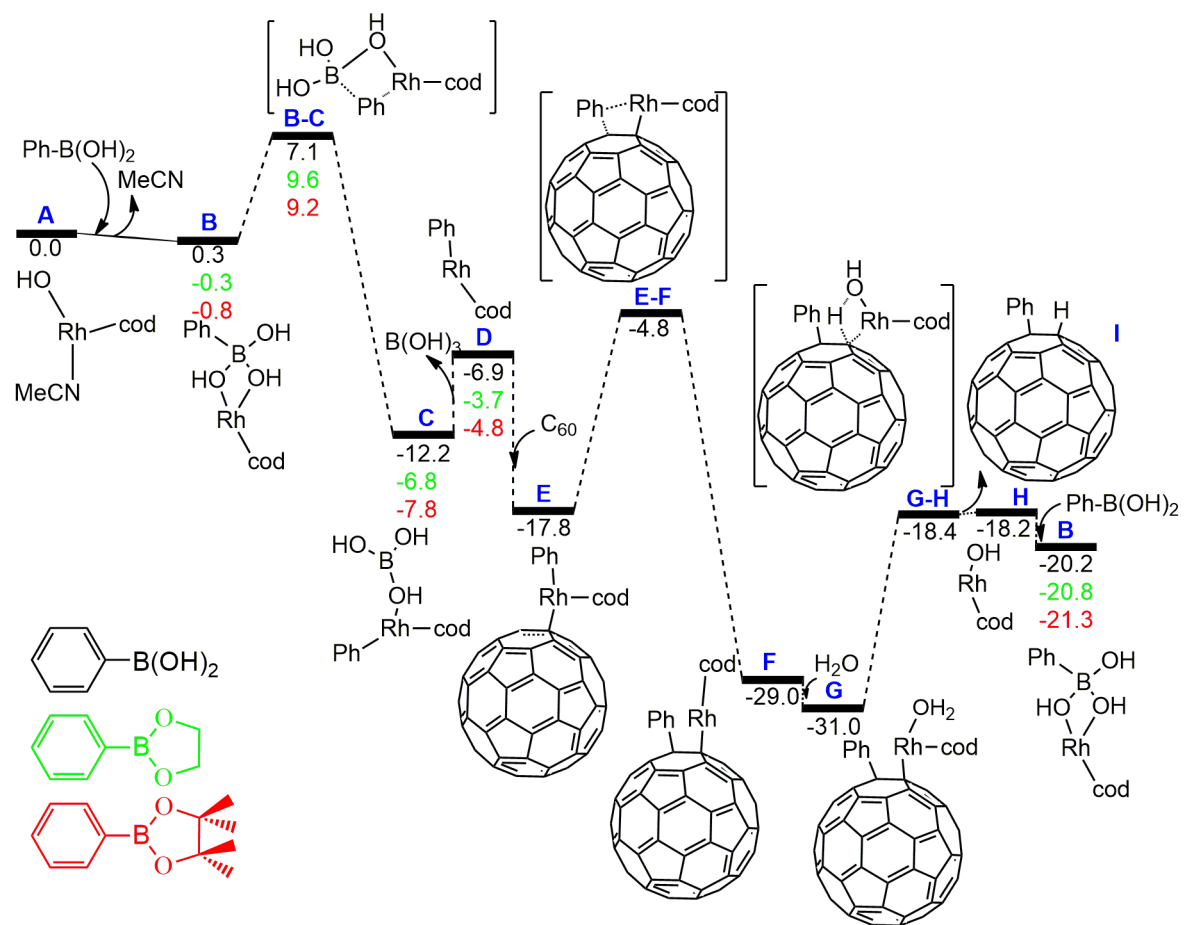

**Figure S2.** Reaction profile for the catalyzed by rhodium addition to fullerene ( $C_{60}$ ) of phenylboronic acid (black), 2-phenyl-1,3,2-dioxaborinane (green) and the 4,4,5,5-tetramethyl-2-phenyl-1,3,2-dioxaborolane (red) in water (Gibbs energies in kcal/mol).

## Index by labels of the structures analyzed in this manuscript

1. MeCN
2. A
3. H<sub>2</sub>O
4. Ph-B(OH)<sub>2</sub>
5. Ph-B(O-C<sub>2</sub>H<sub>4</sub>-O)
6. Ph-B(O-C<sub>2</sub>(Me)<sub>2</sub>H<sub>4</sub>-O)
7. B
8. B-C
9. C
10. C<sub>60</sub>
11. D
12. B-(OH)<sub>3</sub>
13. B(OH)-(O-C<sub>2</sub>H<sub>4</sub>-O)
14. B(OH)-(O-C<sub>2</sub>(Me)<sub>2</sub>H<sub>4</sub>-O)
15. E
16. E-F
17. F
18. G
19. G-H
20. I
21. H = L
22. J
23. K
24. L
25. M
26. N
27. O
28. P
29. COD
30. Q
31. Q-R
32. R
33. S
34. T
35. T-U
36. U
37. V
38. X
39. X-Y
40. Y
41. Y-Z

**Table S1.** Coordinate data sets, absolute energies (a.u.), 3D view for DFT optimized complexes (main distances in Å).

| <b>MeCN</b> |              |                          |
|-------------|--------------|--------------------------|
| N           | 1.440817000  | 0.000001000 0.000110000  |
| C           | 0.280592000  | 0.000001000 -0.000245000 |
| C           | -1.180966000 | 0.000001000 0.000053000  |
| H           | -1.561091000 | -0.999857000 0.232534000 |
| H           | -1.561045000 | 0.701193000 0.749800000  |
| H           | -1.561343000 | 0.298644000 -0.981948000 |

$E_g(\text{B3LYP}/6\text{-}31\text{G}(\text{d})) = -132.75149$   
 $G_g(\text{B3LYP}/6\text{-}31\text{G}(\text{d})) = -132.72986$   
 $E_s(\text{M06}/6\text{-}311\text{G}(\text{d,p})//\text{B3LYP}/6\text{-}31\text{G}(\text{d})) = -132.69818$   
 $G_s(\text{M06}/6\text{-}311\text{G}(\text{d,p})//\text{B3LYP}/6\text{-}31\text{G}(\text{d})) = -132.67655$

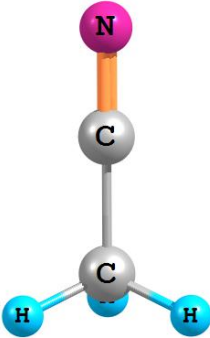

**A**

|    |              |              |              |
|----|--------------|--------------|--------------|
| C  | -0.539692000 | 1.597321000  | 0.546122000  |
| C  | -1.733569000 | -0.951952000 | 0.760355000  |
| C  | -1.592273000 | -1.238972000 | -0.611651000 |
| C  | -0.633185000 | 1.408111000  | -0.848088000 |
| C  | -2.153170000 | -0.420631000 | -1.761821000 |
| C  | -1.934868000 | 1.099519000  | -1.586593000 |
| C  | -1.683581000 | 1.479158000  | 1.540333000  |
| C  | -2.546886000 | 0.215353000  | 1.318313000  |
| H  | -1.574296000 | -1.776620000 | 1.454778000  |
| H  | -1.347038000 | -2.266362000 | -0.880896000 |
| H  | 0.295547000  | 2.199581000  | 0.907478000  |
| H  | 0.147183000  | 1.858862000  | -1.460404000 |
| H  | -2.316261000 | 2.381806000  | 1.530125000  |
| H  | -2.997163000 | -0.086570000 | 2.271012000  |
| H  | -3.221974000 | -0.645410000 | -1.911788000 |
| H  | -1.914675000 | 1.575068000  | -2.574278000 |
| H  | -3.385098000 | 0.434921000  | 0.647406000  |
| H  | -1.239113000 | 1.428854000  | 2.541717000  |
| H  | -1.639702000 | -0.751471000 | -2.672339000 |
| H  | -2.782576000 | 1.549508000  | -1.057345000 |
| Rh | 0.219854000  | -0.358324000 | 0.090381000  |
| N  | 2.207786000  | 0.302711000  | -0.060202000 |
| C  | 3.350803000  | 0.468845000  | -0.111115000 |
| C  | 4.796054000  | 0.649733000  | -0.175087000 |
| H  | 5.078522000  | 1.621017000  | 0.242655000  |
| H  | 5.291613000  | -0.141997000 | 0.395496000  |
| H  | 5.133790000  | 0.599297000  | -1.215077000 |
| O  | 1.089454000  | -2.123965000 | 0.396534000  |
| H  | 0.429872000  | -2.822089000 | 0.538849000  |

 $E_g(\text{B3LYP}/6\text{-}31\text{G}(\text{d})) = -631.24957$  $G_g(\text{B3LYP}/6\text{-}31\text{G}(\text{d})) = -631.04877$  $E_s(\text{M06}/6\text{-}311\text{G}(\text{d},\text{p})//\text{B3LYP}/6\text{-}31\text{G}(\text{d})) = -630.99438$  $G_s(\text{M06}/6\text{-}311\text{G}(\text{d},\text{p})//\text{B3LYP}/6\text{-}31\text{G}(\text{d})) = -630.79358$ 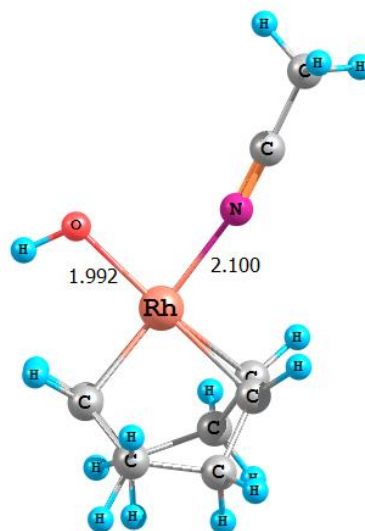

# H<sub>2</sub>O

|   |            |              |              |
|---|------------|--------------|--------------|
| O | 0.00000000 | 0.00000000   | 0.119449000  |
| H | 0.00000000 | 0.762631000  | -0.477796000 |
| H | 0.00000000 | -0.762631000 | -0.477796000 |

$E_g(\text{B3LYP}/6\text{-}31\text{G}(\text{d})) = -76.40702$

$G_g(\text{B3LYP}/6\text{-}31\text{G}(\text{d})) = -76.40355$

$E_s(\text{M06}/6\text{-}311\text{G}(\text{d,p})//\text{B3LYP}/6\text{-}31\text{G}(\text{d})) = -76.41483$

$G_s(\text{M06}/6\text{-}311\text{G}(\text{d,p})//\text{B3LYP}/6\text{-}31\text{G}(\text{d})) = -76.41136$

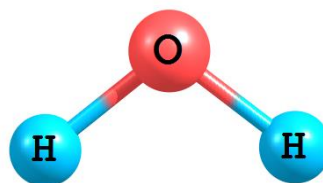

# Ph-B(OH)<sub>2</sub>

|   |              |              |              |
|---|--------------|--------------|--------------|
| O | -2.384994000 | 1.212562000  | -0.000461000 |
| H | -3.350677000 | 1.153694000  | -0.000732000 |
| B | -1.734746000 | -0.000164000 | -0.000016000 |
| O | -2.385517000 | -1.212471000 | 0.000631000  |
| H | -3.351158000 | -1.152687000 | -0.000097000 |
| C | -0.173307000 | -0.000010000 | -0.000134000 |
| C | 0.551417000  | -1.205540000 | -0.000287000 |
| C | 0.551429000  | 1.205529000  | 0.000292000  |
| C | 1.946305000  | -1.209390000 | -0.000248000 |
| H | 0.009821000  | -2.147634000 | -0.000254000 |
| C | 1.946284000  | 1.209333000  | 0.000224000  |
| H | 0.009767000  | 2.147573000  | 0.000582000  |
| C | 2.646095000  | -0.000045000 | -0.000027000 |
| H | 2.488626000  | -2.151703000 | -0.000342000 |
| H | 2.488631000  | 2.151628000  | 0.000550000  |
| H | 3.733466000  | -0.000045000 | 0.000097000  |

$E_g(\text{B3LYP}/6\text{-}31\text{G}(\text{d})) = -408.25139$

$G_g(\text{B3LYP}/6\text{-}31\text{G}(\text{d})) = -408.15927$

$E_s(\text{M06}/6\text{-}311\text{G}(\text{d,p})//\text{B3LYP}/6\text{-}31\text{G}(\text{d})) = -408.11344$

$G_s(\text{M06}/6\text{-}311\text{G}(\text{d,p})//\text{B3LYP}/6\text{-}31\text{G}(\text{d})) = -408.02132$

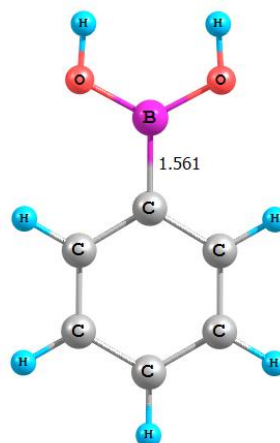



**Ph-B(O-C<sub>2</sub>H<sub>4</sub>-O)**

|   |              |              |              |
|---|--------------|--------------|--------------|
| O | 1.729523000  | -1.148309000 | 0.014602000  |
| B | 0.972405000  | 0.000029000  | 0.000000000  |
| O | 1.729567000  | 1.148330000  | -0.014603000 |
| C | -0.578831000 | 0.000027000  | 0.000000000  |
| C | -1.301045000 | 1.207139000  | -0.002275000 |
| C | -1.301003000 | -1.207116000 | 0.002275000  |
| C | -2.695713000 | 1.210175000  | -0.002346000 |
| H | -0.758666000 | 2.149096000  | -0.003930000 |
| C | -2.695668000 | -1.210198000 | 0.002346000  |
| H | -0.758587000 | -2.149049000 | 0.003927000  |
| C | -3.394481000 | -0.000023000 | 0.000000000  |
| H | -3.238776000 | 2.151883000  | -0.004108000 |
| H | -3.238704000 | -2.151923000 | 0.004105000  |
| H | -4.481761000 | -0.000045000 | 0.000000000  |
| C | 3.113186000  | -0.776352000 | -0.022524000 |
| H | 3.563333000  | -1.169932000 | -0.940892000 |
| H | 3.628506000  | -1.224175000 | 0.833833000  |
| C | 3.113218000  | 0.776318000  | 0.022524000  |
| H | 3.628553000  | 1.224127000  | -0.833831000 |
| H | 3.563377000  | 1.169878000  | 0.940893000  |

 $E_g(\text{B3LYP}/6\text{-}31\text{G}(\text{d})) = -485.66200$  $G_g(\text{B3LYP}/6\text{-}31\text{G}(\text{d})) = -485.53662$  $E_s(\text{M06}/6\text{-}311\text{G}(\text{d},\text{p})//\text{B3LYP}/6\text{-}31\text{G}(\text{d})) = -485.45987$  $G_s(\text{M06}/6\text{-}311\text{G}(\text{d},\text{p})//\text{B3LYP}/6\text{-}31\text{G}(\text{d})) = -485.33449$ 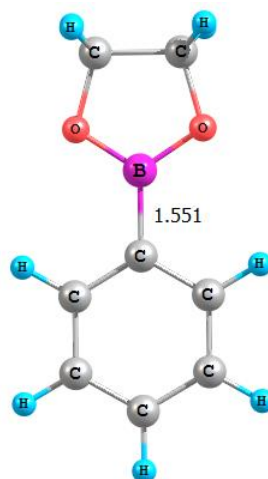

**Ph-B(O-C<sub>2</sub>(Me)<sub>2</sub>H<sub>4</sub>-O)**

|   |              |              |              |
|---|--------------|--------------|--------------|
| O | -0.635303000 | 1.127179000  | 0.208913000  |
| B | 0.124418000  | -0.000118000 | -0.000100000 |
| O | -0.635405000 | -1.127273000 | -0.208977000 |
| C | 1.677480000  | 0.000004000  | -0.000064000 |
| C | 2.400060000  | -1.196510000 | -0.157613000 |
| C | 2.400066000  | 1.196534000  | 0.157602000  |
| C | 3.794831000  | -1.199737000 | -0.158897000 |
| H | 1.856898000  | -2.130119000 | -0.279875000 |
| C | 3.794787000  | 1.199732000  | 0.158932000  |
| H | 1.856833000  | 2.130095000  | 0.279913000  |
| C | 4.493663000  | -0.000014000 | -0.000001000 |
| H | 4.338019000  | -2.133316000 | -0.282466000 |
| H | 4.338042000  | 2.133267000  | 0.282550000  |
| H | 5.580984000  | 0.000050000  | -0.000013000 |
| C | -2.018865000 | 0.785783000  | -0.082432000 |
| C | -2.293154000 | 1.247905000  | -1.520240000 |
| H | -1.652647000 | 0.723085000  | -2.236118000 |
| H | -3.338266000 | 1.086977000  | -1.805598000 |
| H | -2.076267000 | 2.318001000  | -1.596169000 |
| C | -2.919178000 | 1.542971000  | 0.892650000  |
| H | -2.649820000 | 1.340764000  | 1.931782000  |
| H | -2.820063000 | 2.619983000  | 0.722418000  |
| H | -3.970981000 | 1.272118000  | 0.744397000  |
| C | -2.018954000 | -0.785754000 | 0.082470000  |
| C | -2.919378000 | -1.542841000 | -0.892587000 |
| H | -2.820522000 | -2.619862000 | -0.722251000 |
| H | -3.971125000 | -1.271720000 | -0.744420000 |
| H | -2.649893000 | -1.340720000 | -1.931711000 |
| C | -2.293121000 | -1.247917000 | 1.520278000  |
| H | -3.338091000 | -1.086517000 | 1.805880000  |
| H | -2.076739000 | -2.318127000 | 1.596005000  |
| H | -1.652204000 | -0.723503000 | 2.236089000  |

 $E_g(\text{B3LYP}/6\text{-}31\text{G}(\text{d})) = -642.93018$  $G_g(\text{B3LYP}/6\text{-}31\text{G}(\text{d})) = -642.69725$  $E_s(\text{M06}/6\text{-}311\text{G}(\text{d},\text{p})//\text{B3LYP}/6\text{-}31\text{G}(\text{d})) = -642.64812$  $G_s(\text{M06}/6\text{-}311\text{G}(\text{d},\text{p})//\text{B3LYP}/6\text{-}31\text{G}(\text{d})) = -642.41519$ 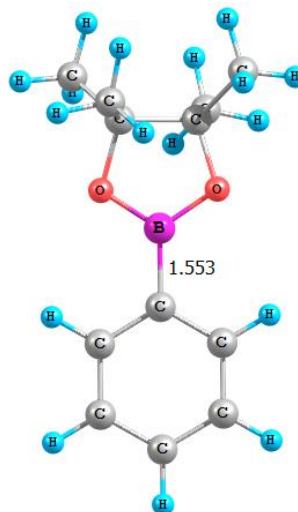

**B**

|    |              |              |              |
|----|--------------|--------------|--------------|
| C  | -1.301328000 | 1.464444000  | 0.642962000  |
| C  | -2.043523000 | -1.247960000 | 0.849595000  |
| C  | -2.084344000 | -1.441813000 | -0.551879000 |
| C  | -1.594986000 | 1.323553000  | -0.721416000 |
| C  | -2.953427000 | -0.676402000 | -1.532421000 |
| C  | -2.936689000 | 0.846741000  | -1.273586000 |
| C  | -2.223190000 | 1.107442000  | 1.796923000  |
| C  | -2.922275000 | -0.260248000 | 1.612929000  |
| H  | -1.632163000 | -2.065039000 | 1.441029000  |
| H  | -1.743739000 | -2.411942000 | -0.917843000 |
| H  | -0.492614000 | 2.146447000  | 0.901068000  |
| H  | -0.983751000 | 1.899247000  | -1.411888000 |
| H  | -2.968142000 | 1.902440000  | 1.958748000  |
| H  | -3.159546000 | -0.678794000 | 2.597200000  |
| H  | -3.985882000 | -1.060364000 | -1.522114000 |
| H  | -3.145477000 | 1.374884000  | -2.210764000 |
| H  | -3.881032000 | -0.138334000 | 1.097469000  |
| H  | -1.609907000 | 1.073324000  | 2.704644000  |
| H  | -2.564190000 | -0.873126000 | -2.538295000 |
| H  | -3.740302000 | 1.127723000  | -0.584599000 |
| Rh | -0.342593000 | -0.330563000 | -0.053846000 |
| O  | 2.906085000  | -1.768636000 | 1.327444000  |
| H  | 2.954130000  | -2.730318000 | 1.430959000  |
| B  | 2.261310000  | -1.472665000 | 0.083429000  |
| O  | 2.838771000  | -2.063294000 | -1.115146000 |
| H  | 3.802010000  | -1.998577000 | -1.062423000 |
| O  | 0.807915000  | -2.069178000 | 0.053933000  |
| H  | 0.761856000  | -2.612897000 | -0.750920000 |
| C  | 2.037741000  | 0.161224000  | -0.013194000 |
| C  | 1.774339000  | 0.789628000  | -1.256430000 |
| C  | 2.245380000  | 1.016899000  | 1.100059000  |
| C  | 1.758712000  | 2.188602000  | -1.390361000 |
| H  | 1.681865000  | 0.169082000  | -2.145706000 |
| C  | 2.235953000  | 2.403539000  | 0.971759000  |
| H  | 2.465971000  | 0.556396000  | 2.058762000  |
| C  | 1.992892000  | 2.993935000  | -0.278457000 |
| H  | 1.587582000  | 2.639912000  | -2.365203000 |
| H  | 2.430341000  | 3.033439000  | 1.837029000  |
| H  | 2.000220000  | 4.076538000  | -0.379986000 |

$$E_g(\text{B3LYP}/6\text{-}31\text{G}(\text{d})) = -906.75241$$

$$G_g(\text{B3LYP}/6\text{-}31\text{G}(\text{d})) = -906.47560$$

$$E_s(\text{M06}/6\text{-}311\text{G}(\text{d},\text{p})//\text{B3LYP}/6\text{-}31\text{G}(\text{d})) = -906.41611$$

$$G_s(\text{M06}/6\text{-}311\text{G}(\text{d},\text{p})//\text{B3LYP}/6\text{-}31\text{G}(\text{d})) = -906.13930$$

With Ph-B(OH)<sub>2</sub>

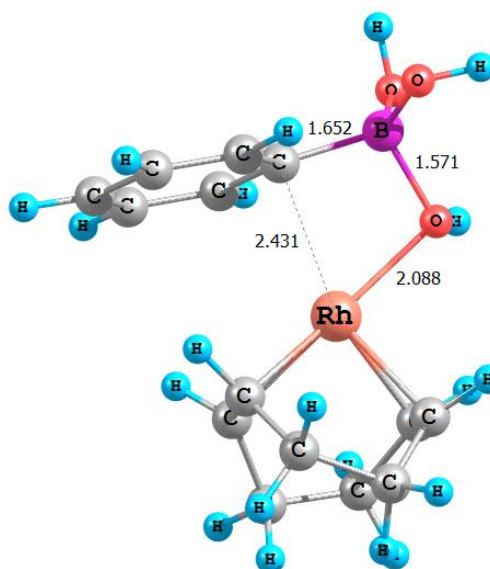

**B**

|    |              |              |              |
|----|--------------|--------------|--------------|
| C  | -2.051969000 | 1.137089000  | 0.568222000  |
| C  | -1.899467000 | -1.654527000 | 0.934549000  |
| C  | -1.914585000 | -1.933289000 | -0.452408000 |
| C  | -2.323753000 | 0.831566000  | -0.774358000 |
| C  | -3.008040000 | -1.536450000 | -1.427170000 |
| C  | -3.462817000 | -0.071096000 | -1.243499000 |
| C  | -2.789365000 | 0.580154000  | 1.774539000  |
| C  | -3.023506000 | -0.947024000 | 1.687592000  |
| H  | -1.233517000 | -2.262294000 | 1.545766000  |
| H  | -1.295008000 | -2.766673000 | -0.787666000 |
| H  | -1.485901000 | 2.048491000  | 0.758306000  |
| H  | -1.943379000 | 1.526360000  | -1.519469000 |
| H  | -3.744596000 | 1.107615000  | 1.923231000  |
| H  | -3.089301000 | -1.359267000 | 2.700432000  |
| H  | -3.867113000 | -2.221534000 | -1.349338000 |
| H  | -3.850717000 | 0.308709000  | -2.195357000 |
| H  | -3.985176000 | -1.163933000 | 1.210051000  |
| H  | -2.179171000 | 0.796861000  | 2.658759000  |
| H  | -2.607025000 | -1.662974000 | -2.439605000 |
| H  | -4.296092000 | -0.013195000 | -0.535283000 |
| Rh | -0.599597000 | -0.302920000 | -0.083652000 |
| O  | 3.102774000  | -0.723502000 | 1.199171000  |
| B  | 2.263549000  | -0.580412000 | 0.039659000  |
| O  | 3.044528000  | -0.951916000 | -1.132751000 |
| O  | 1.047537000  | -1.579234000 | 0.059349000  |
| H  | 1.173529000  | -2.176340000 | -0.697025000 |
| C  | 1.539949000  | 0.888782000  | -0.028665000 |
| C  | 1.022264000  | 1.393641000  | -1.247803000 |
| C  | 1.534534000  | 1.772242000  | 1.082185000  |
| C  | 0.572073000  | 2.722423000  | -1.364851000 |
| H  | 1.083867000  | 0.777130000  | -2.143128000 |
| C  | 1.082035000  | 3.082956000  | 0.972017000  |
| H  | 1.948235000  | 1.413715000  | 2.020752000  |
| C  | 0.602221000  | 3.564432000  | -0.258071000 |
| H  | 0.222775000  | 3.094185000  | -2.325463000 |
| H  | 1.115273000  | 3.745644000  | 1.833845000  |
| H  | 0.269726000  | 4.598801000  | -0.346357000 |
| C  | 4.373563000  | -1.195978000 | -0.696697000 |
| H  | 4.810164000  | -2.031381000 | -1.259084000 |
| H  | 5.001460000  | -0.306062000 | -0.865446000 |
| C  | 4.229388000  | -1.489180000 | 0.807577000  |
| H  | 4.053536000  | -2.564167000 | 0.981199000  |
| H  | 5.108705000  | -1.190471000 | 1.391821000  |

 $E_g(\text{B3LYP}/6\text{-}31\text{G}(\text{d})) = -984.15981$  $G_g(\text{B3LYP}/6\text{-}31\text{G}(\text{d})) = -983.84821$  $E_s(\text{M06}/6\text{-}311\text{G}(\text{d,p})//\text{B3LYP}/6\text{-}31\text{G}(\text{d})) = -983.76416$  $G_s(\text{M06}/6\text{-}311\text{G}(\text{d,p})//\text{B3LYP}/6\text{-}31\text{G}(\text{d})) = -983.45256$ With Ph-B(O-C<sub>2</sub>H<sub>4</sub>-O)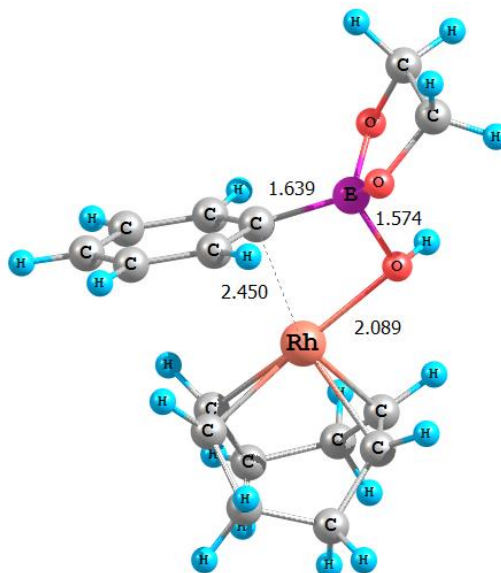

**B**

|    |              |              |              |
|----|--------------|--------------|--------------|
| C  | -2.926072000 | 0.849870000  | 0.679971000  |
| C  | -2.336698000 | -1.904127000 | 0.799738000  |
| C  | -2.346105000 | -2.064434000 | -0.605859000 |
| C  | -3.186899000 | 0.620148000  | -0.679780000 |
| C  | -3.514258000 | -1.762895000 | -1.526999000 |
| C  | -4.184860000 | -0.407509000 | -1.209793000 |
| C  | -3.528166000 | 0.084924000  | 1.846679000  |
| C  | -3.535187000 | -1.446169000 | 1.626415000  |
| H  | -1.568089000 | -2.448609000 | 1.346711000  |
| H  | -1.614327000 | -2.759287000 | -1.021352000 |
| H  | -2.505567000 | 1.820703000  | 0.940737000  |
| H  | -2.944193000 | 1.427789000  | -1.366251000 |
| H  | -4.544768000 | 0.447508000  | 2.065494000  |
| H  | -3.513568000 | -1.950628000 | 2.598588000  |
| H  | -4.254551000 | -2.578059000 | -1.497626000 |
| H  | -4.652543000 | -0.014477000 | -2.119459000 |
| H  | -4.464878000 | -1.762321000 | 1.141002000  |
| H  | -2.923757000 | 0.313091000  | 2.731966000  |
| H  | -3.126094000 | -1.739416000 | -2.552044000 |
| H  | -4.997407000 | -0.540049000 | -0.487667000 |
| Rh | -1.288015000 | -0.285269000 | -0.117898000 |
| O  | 2.426633000  | -0.214323000 | 1.157903000  |
| B  | 1.591106000  | -0.129403000 | -0.007741000 |
| O  | 2.439125000  | -0.301230000 | -1.174369000 |
| O  | 0.537035000  | -1.297387000 | -0.090657000 |
| H  | 0.750071000  | -1.798026000 | -0.896098000 |
| C  | 0.645720000  | 1.215278000  | 0.007897000  |
| C  | 0.039343000  | 1.700210000  | -1.178122000 |
| C  | 0.517287000  | 2.024377000  | 1.166705000  |
| C  | -0.612952000 | 2.947322000  | -1.218049000 |
| H  | 0.184942000  | 1.152428000  | -2.107957000 |
| C  | -0.134182000 | 3.253143000  | 1.132898000  |
| H  | 0.994788000  | 1.683995000  | 2.081057000  |
| C  | -0.699060000 | 3.721530000  | -0.065608000 |
| H  | -1.028345000 | 3.312558000  | -2.154574000 |
| H  | -0.193078000 | 3.864213000  | 2.030817000  |
| H  | -1.188914000 | 4.691735000  | -0.093744000 |
| C  | 3.805958000  | -0.262956000 | -0.740592000 |
| C  | 3.699199000  | -0.737852000 | 0.762982000  |
| C  | 4.634329000  | -1.173504000 | -1.650506000 |
| H  | 4.628834000  | -0.77584000  | -2.672319000 |
| H  | 5.677299000  | -1.228064000 | -1.315635000 |
| H  | 4.226040000  | -2.187050000 | -1.681688000 |
| C  | 3.671452000  | -2.271626000 | 0.903432000  |
| H  | 4.649785000  | -2.722949000 | 0.700221000  |
| H  | 3.381509000  | -2.523740000 | 1.928849000  |
| H  | 2.935067000  | -2.719214000 | 0.229598000  |
| C  | 4.768782000  | -0.165320000 | 1.697702000  |
| H  | 4.730585000  | 0.926431000  | 1.725309000  |
| H  | 4.600002000  | -0.531989000 | 2.716410000  |
| H  | 5.775557000  | -0.474080000 | 1.390488000  |
| C  | 4.305980000  | 1.187205000  | -0.868800000 |
| H  | 5.372838000  | 1.281872000  | -0.635163000 |
| H  | 4.149762000  | 1.522911000  | -1.899621000 |
| H  | 3.744118000  | 1.853270000  | -0.206836000 |

 $E_g(\text{B3LYP}/6\text{-}31\text{G}(\text{d})) = -1141.42664$  $G_g(\text{B3LYP}/6\text{-}31\text{G}(\text{d})) = -1141.00838$  $E_s(\text{M06}/6\text{-}311\text{G}(\text{d},\text{p})//\text{B3LYP}/6\text{-}31\text{G}(\text{d})) = -1140.95231$  $G_s(\text{M06}/6\text{-}311\text{G}(\text{d},\text{p})//\text{B3LYP}/6\text{-}31\text{G}(\text{d})) = -1140.53405$ With Ph-B(O-C<sub>2</sub>(Me)<sub>2</sub>H<sub>4</sub>-O)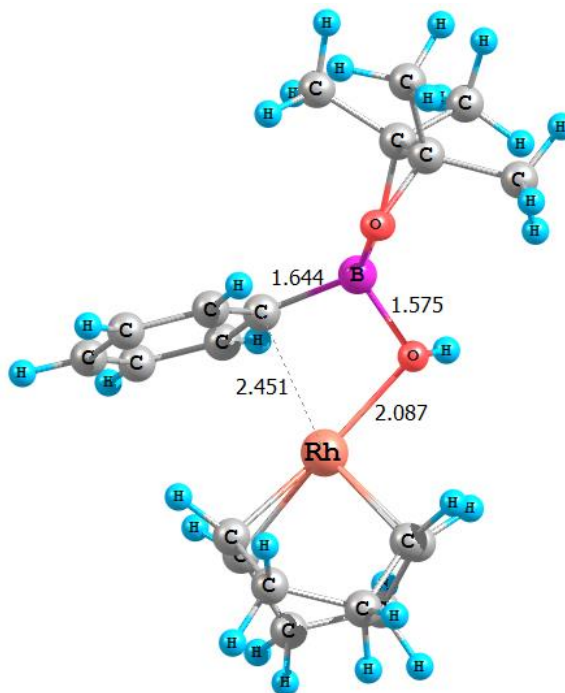

## B-C

|    |              |              |              |
|----|--------------|--------------|--------------|
| C  | 1.126280000  | -1.134138000 | 1.266407000  |
| C  | 2.521449000  | 1.055225000  | 0.130125000  |
| C  | 2.337036000  | 0.607803000  | -1.188191000 |
| C  | 1.169773000  | -1.694699000 | -0.022348000 |
| C  | 2.785736000  | -0.728759000 | -1.751848000 |
| C  | 2.452223000  | -1.919794000 | -0.822049000 |
| C  | 2.311761000  | -0.602498000 | 2.053125000  |
| C  | 3.265264000  | 0.273957000  | 1.207034000  |
| H  | 2.425054000  | 2.126483000  | 0.303783000  |
| H  | 2.141386000  | 1.372248000  | -1.942968000 |
| H  | 0.258959000  | -1.379197000 | 1.877605000  |
| H  | 0.322459000  | -2.312563000 | -0.314576000 |
| H  | 2.866614000  | -1.430597000 | 2.522330000  |
| H  | 3.787550000  | 0.976650000  | 1.866055000  |
| H  | 3.862069000  | -0.714558000 | -1.985282000 |
| H  | 2.341169000  | -2.825878000 | -1.428262000 |
| H  | 4.044717000  | -0.343218000 | 0.747749000  |
| H  | 1.912849000  | 0.000449000  | 2.877786000  |
| H  | 2.268190000  | -0.869417000 | -2.708216000 |
| H  | 3.285835000  | -2.116884000 | -0.138996000 |
| Rh | 0.475543000  | 0.346491000  | -0.140284000 |
| O  | -1.771042000 | 2.315892000  | 1.351363000  |
| H  | -0.897949000 | 2.316820000  | 1.767447000  |
| B  | -1.693729000 | 1.879478000  | 0.012793000  |
| O  | -2.761234000 | 2.221699000  | -0.838083000 |
| H  | -3.578094000 | 2.294001000  | -0.325496000 |
| O  | -0.398336000 | 2.204832000  | -0.653672000 |
| H  | -0.563625000 | 2.362912000  | -1.597701000 |
| C  | -1.705505000 | -0.085972000 | 0.046440000  |
| C  | -2.048289000 | -0.733599000 | -1.166573000 |
| C  | -2.240916000 | -0.651006000 | 1.226059000  |
| C  | -2.848801000 | -1.876982000 | -1.202015000 |
| H  | -1.698261000 | -0.319667000 | -2.111249000 |
| C  | -3.054673000 | -1.784241000 | 1.206579000  |
| H  | -2.040649000 | -0.160647000 | 2.175973000  |
| C  | -3.352128000 | -2.406394000 | -0.010160000 |
| H  | -3.091993000 | -2.346997000 | -2.152322000 |
| H  | -3.462661000 | -2.181567000 | 2.133430000  |
| H  | -3.984787000 | -3.290655000 | -0.030532000 |

$E_g(\text{B3LYP}/6\text{-}31\text{G}(\text{d})) = -906.73814$

$G_g(\text{B3LYP}/6\text{-}31\text{G}(\text{d})) = -906.46343$

$E_s(\text{M06}/6\text{-}311\text{G}(\text{d,p})//\text{B3LYP}/6\text{-}31\text{G}(\text{d})) = -906.40350$

$G_s(\text{M06}/6\text{-}311\text{G}(\text{d,p})//\text{B3LYP}/6\text{-}31\text{G}(\text{d})) = -906.12879$

With Ph-B(OH)<sub>2</sub>

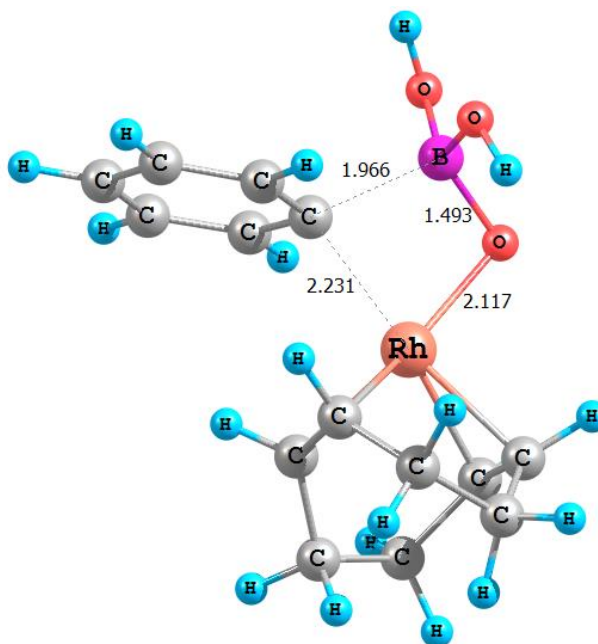

## B-C

|    |              |              |              |
|----|--------------|--------------|--------------|
| C  | -1.658966000 | 1.002222000  | 1.256681000  |
| C  | -2.552936000 | -1.493576000 | 0.239974000  |
| C  | -2.538549000 | -1.059415000 | -1.092282000 |
| C  | -1.895110000 | 1.493617000  | -0.040795000 |
| C  | -3.317145000 | 0.114932000  | -1.659499000 |
| C  | -3.230343000 | 1.381872000  | -0.775813000 |
| C  | -2.638635000 | 0.225928000  | 2.117791000  |
| C  | -3.403743000 | -0.871154000 | 1.339976000  |
| H  | -2.181991000 | -2.498288000 | 0.438964000  |
| H  | -2.200104000 | -1.778523000 | -1.841224000 |
| H  | -0.852361000 | 1.472497000  | 1.816970000  |
| H  | -1.240422000 | 2.292226000  | -0.385271000 |
| H  | -3.347724000 | 0.909845000  | 2.611399000  |
| H  | -3.716230000 | -1.654818000 | 2.039319000  |
| H  | -4.370080000 | -0.159076000 | -1.832177000 |
| H  | -3.366473000 | 2.267557000  | -1.406778000 |
| H  | -4.326232000 | -0.463932000 | 0.912237000  |
| H  | -2.060913000 | -0.246414000 | 2.921215000  |
| H  | -2.895376000 | 0.340739000  | -2.646127000 |
| H  | -4.053368000 | 1.399915000  | -0.052886000 |
| Rh | -0.738136000 | -0.320427000 | -0.146153000 |
| O  | 2.161017000  | -1.710807000 | 1.053552000  |
| B  | 1.754923000  | -1.294749000 | -0.228204000 |
| O  | 2.837867000  | -1.296412000 | -1.135985000 |
| O  | 0.533040000  | -1.920235000 | -0.734878000 |
| H  | 0.620628000  | -2.039099000 | -1.694513000 |
| C  | 1.235891000  | 0.665488000  | -0.055270000 |
| C  | 1.458701000  | 1.424168000  | -1.230161000 |
| C  | 1.706726000  | 1.232554000  | 1.151444000  |
| C  | 2.094525000  | 2.666869000  | -1.205404000 |
| H  | 1.141690000  | 1.024844000  | -2.192392000 |
| C  | 2.350921000  | 2.470119000  | 1.191228000  |
| H  | 1.586421000  | 0.668549000  | 2.074118000  |
| C  | 2.540612000  | 3.193908000  | 0.009875000  |
| H  | 2.250801000  | 3.220381000  | -2.128680000 |
| H  | 2.708623000  | 2.870609000  | 2.137404000  |
| H  | 3.042796000  | 4.158152000  | 0.035013000  |
| C  | 4.007860000  | -1.66041000  | -0.402899000 |
| H  | 4.314579000  | -2.676509000 | -0.689215000 |
| H  | 4.828657000  | -0.973612000 | -0.638769000 |
| C  | 3.579510000  | -1.587916000 | 1.081548000  |
| H  | 4.003329000  | -2.393230000 | 1.690772000  |
| H  | 3.863866000  | -0.624259000 | 1.528641000  |

$E_g(\text{B3LYP}/6\text{-}31\text{G}(\text{d})) = -984.14258$

$G_g(\text{B3LYP}/6\text{-}31\text{G}(\text{d})) = -983.83135$

$E_s(\text{M06}/6\text{-}311\text{G}(\text{d,p})//\text{B3LYP}/6\text{-}31\text{G}(\text{d})) = -983.74832$

$G_s(\text{M06}/6\text{-}311\text{G}(\text{d,p})//\text{B3LYP}/6\text{-}31\text{G}(\text{d})) = -983.43709$

With Ph-B(O-C<sub>2</sub>H<sub>4</sub>-O)

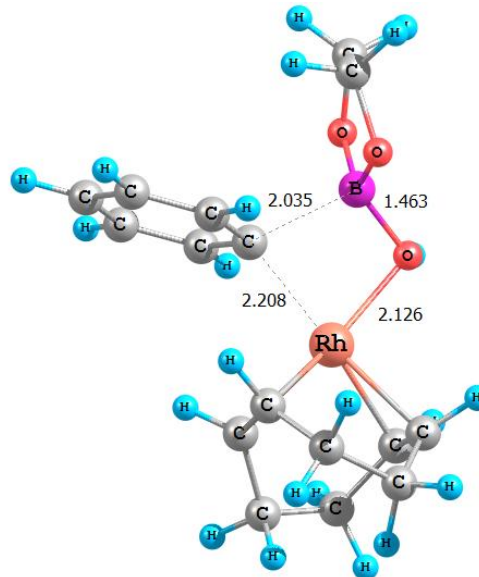

# B-C

|    |              |              |              |
|----|--------------|--------------|--------------|
| C  | -2.484455000 | 0.539399000  | 1.383294000  |
| C  | -2.779003000 | -1.935652000 | 0.021080000  |
| C  | -2.920543000 | -1.323248000 | -1.234804000 |
| C  | -2.885986000 | 1.132548000  | 0.171613000  |
| C  | -3.980380000 | -0.317797000 | -1.628197000 |
| C  | -4.178346000 | 0.793512000  | -0.570382000 |
| C  | -3.208101000 | -0.568627000 | 2.126660000  |
| C  | -3.713338000 | -1.700165000 | 1.200618000  |
| H  | -2.164070000 | -2.833158000 | 0.074581000  |
| H  | -2.441495000 | -1.833303000 | -2.078648000 |
| H  | -1.798691000 | 1.114450000  | 2.003619000  |
| H  | -2.463596000 | 2.109788000  | -0.055244000 |
| H  | -4.042125000 | -0.158199000 | 2.718432000  |
| H  | -3.800752000 | -2.625914000 | 1.780646000  |
| H  | -4.939251000 | -0.815037000 | -1.844592000 |
| H  | -4.552887000 | 1.695710000  | -1.067291000 |
| H  | -4.721924000 | -1.475663000 | 0.837781000  |
| H  | -2.499908000 | -0.991431000 | 2.849259000  |
| H  | -3.656089000 | 0.143030000  | -2.568803000 |
| H  | -4.953401000 | 0.503508000  | 0.147475000  |
| Rh | -1.321161000 | -0.298501000 | -0.200313000 |
| O  | 1.833096000  | -1.039320000 | 0.831070000  |
| B  | 1.343363000  | -0.620370000 | -0.414235000 |
| O  | 2.387970000  | -0.313287000 | -1.302669000 |
| O  | 0.280006000  | -1.424293000 | -1.031079000 |
| H  | 0.352870000  | -1.344335000 | -1.996531000 |
| C  | 0.320398000  | 1.146289000  | -0.012960000 |
| C  | 0.337871000  | 2.029985000  | -1.117716000 |
| C  | 0.652697000  | 1.707984000  | 1.241206000  |
| C  | 0.650624000  | 3.385400000  | -0.984501000 |
| H  | 0.114385000  | 1.648250000  | -2.113135000 |
| C  | 0.966463000  | 3.058963000  | 1.390971000  |
| H  | 0.693456000  | 1.056075000  | 2.110765000  |
| C  | 0.961315000  | 3.903775000  | 0.274740000  |
| H  | 0.658245000  | 4.033863000  | -1.857838000 |
| H  | 1.221495000  | 3.456386000  | 2.371165000  |
| H  | 1.208329000  | 4.956932000  | 0.386016000  |
| C  | 3.628036000  | -0.346479000 | -0.560551000 |
| C  | 3.255216000  | -1.257504000 | 0.682990000  |
| C  | 3.941838000  | -0.869182000 | 1.992935000  |
| H  | 3.600221000  | -1.531508000 | 2.795692000  |
| H  | 5.030847000  | -0.968768000 | 1.912975000  |
| H  | 3.705143000  | 0.158085000  | 2.279257000  |
| C  | 3.457821000  | -2.757674000 | 0.414334000  |
| H  | 4.518530000  | -3.025203000 | 0.348442000  |
| H  | 3.010207000  | -3.324622000 | 1.236951000  |
| H  | 2.961863000  | -3.064056000 | -0.511864000 |
| C  | 4.007327000  | 1.092784000  | -0.180538000 |
| H  | 4.982553000  | 1.131117000  | 0.317939000  |
| H  | 4.066531000  | 1.692921000  | -1.094289000 |
| H  | 3.262305000  | 1.551804000  | 0.472569000  |
| C  | 4.707969000  | -0.926339000 | -1.477784000 |
| H  | 4.870183000  | -0.248713000 | -2.322795000 |
| H  | 5.660374000  | -1.034852000 | -0.945460000 |
| H  | 4.418980000  | -1.900796000 | -1.878428000 |

$E_g(\text{B3LYP}/6\text{-}31\text{G}(\text{d})) = -1141.40868$

$G_g(\text{B3LYP}/6\text{-}31\text{G}(\text{d})) = -1140.99038$

$E_s(\text{M06}/6\text{-}311\text{G}(\text{d},\text{p})//\text{B3LYP}/6\text{-}31\text{G}(\text{d})) = -1140.93685$

$G_s(\text{M06}/6\text{-}311\text{G}(\text{d},\text{p})//\text{B3LYP}/6\text{-}31\text{G}(\text{d})) = -1140.51855$

With Ph-B(O-C<sub>2</sub>(Me)<sub>2</sub>H<sub>4</sub>-O)

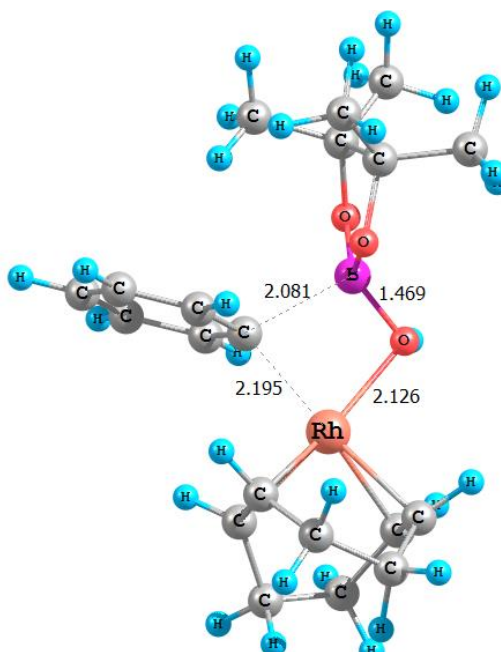



**C**

|    |              |              |              |
|----|--------------|--------------|--------------|
| C  | 1.358057000  | 1.434590000  | -1.041978000 |
| C  | 2.405946000  | -1.163987000 | -0.439714000 |
| C  | 2.326223000  | -0.981824000 | 0.933873000  |
| C  | 1.529417000  | 1.711847000  | 0.339137000  |
| C  | 2.986730000  | 0.125345000  | 1.737490000  |
| C  | 2.846652000  | 1.527339000  | 1.096357000  |
| C  | 2.408747000  | 0.873312000  | -1.983546000 |
| C  | 3.226862000  | -0.294170000 | -1.380355000 |
| H  | 2.091919000  | -2.127310000 | -0.841519000 |
| H  | 1.998558000  | -1.832442000 | 1.536932000  |
| H  | 0.576659000  | 1.996878000  | -1.552925000 |
| H  | 0.853771000  | 2.448955000  | 0.770762000  |
| H  | 3.087726000  | 1.670662000  | -2.327392000 |
| H  | 3.616344000  | -0.915988000 | -2.194818000 |
| H  | 4.049163000  | -0.103687000 | 1.917595000  |
| H  | 2.913102000  | 2.282486000  | 1.888102000  |
| H  | 4.104890000  | 0.091428000  | -0.852085000 |
| H  | 1.885452000  | 0.514007000  | -2.878413000 |
| H  | 2.507095000  | 0.140070000  | 2.723429000  |
| H  | 3.690723000  | 1.724748000  | 0.425293000  |
| Rh | 0.456018000  | -0.097792000 | 0.085562000  |
| O  | -2.707768000 | -1.865896000 | -0.707525000 |
| H  | -2.515270000 | -0.907404000 | -0.687718000 |
| B  | -1.778891000 | -2.614903000 | -0.079339000 |
| O  | -1.882090000 | -3.974752000 | 0.033812000  |
| H  | -2.700321000 | -4.293407000 | -0.373799000 |
| O  | -0.633375000 | -2.043843000 | 0.496748000  |
| H  | -0.068000000 | -2.728913000 | 0.885299000  |
| C  | -1.345523000 | 0.880916000  | 0.049303000  |
| C  | -2.015618000 | 1.125068000  | 1.270653000  |
| C  | -2.015626000 | 1.292970000  | -1.124326000 |
| C  | -3.267484000 | 1.744509000  | 1.317990000  |
| H  | -1.549352000 | 0.823966000  | 2.208011000  |
| C  | -3.277504000 | 1.904643000  | -1.084362000 |
| H  | -1.549002000 | 1.133686000  | -2.095651000 |
| C  | -3.906937000 | 2.136398000  | 0.138001000  |
| H  | -3.747522000 | 1.918751000  | 2.279071000  |
| H  | -3.762888000 | 2.199649000  | -2.012571000 |
| H  | -4.883183000 | 2.613193000  | 0.173378000  |

 $E_g(\text{B3LYP}/6\text{-}31\text{G}(\text{d})) = -906.77413$  $G_g(\text{B3LYP}/6\text{-}31\text{G}(\text{d})) = -906.49941$  $E_s(\text{M06}/6\text{-}311\text{G}(\text{d,p})//\text{B3LYP}/6\text{-}31\text{G}(\text{d})) = -906.43451$  $G_s(\text{M06}/6\text{-}311\text{G}(\text{d,p})//\text{B3LYP}/6\text{-}31\text{G}(\text{d})) = -906.15979$ With Ph-B(OH)<sub>2</sub>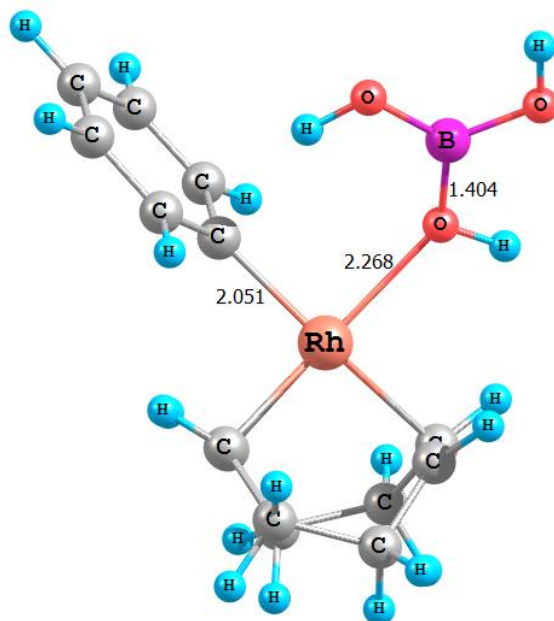

**C**

|    |              |              |              |
|----|--------------|--------------|--------------|
| C  | -2.264148000 | -0.524425000 | 1.094415000  |
| C  | -0.239208000 | -2.423579000 | 0.352907000  |
| C  | -0.438253000 | -2.253508000 | -1.007273000 |
| C  | -2.642436000 | -0.559610000 | -0.274488000 |
| C  | -1.742610000 | -2.451155000 | -1.759333000 |
| C  | -2.973708000 | -1.837895000 | -1.047585000 |
| C  | -2.070724000 | -1.728598000 | 1.999718000  |
| C  | -1.302653000 | -2.896602000 | 1.332799000  |
| H  | 0.791634000  | -2.469468000 | 0.699618000  |
| H  | 0.451111000  | -2.202647000 | -1.636236000 |
| H  | -2.496020000 | 0.392474000  | 1.636335000  |
| H  | -3.107909000 | 0.343174000  | -0.668130000 |
| H  | -3.040138000 | -2.087222000 | 2.383459000  |
| H  | -0.826424000 | -3.500635000 | 2.114429000  |
| H  | -1.918986000 | -3.519862000 | -1.961879000 |
| H  | -3.737936000 | -1.612320000 | -1.800570000 |
| H  | -2.003166000 | -3.567093000 | 0.823931000  |
| H  | -1.505704000 | -1.388158000 | 2.876786000  |
| H  | -1.628622000 | -1.971558000 | -2.738944000 |
| H  | -3.428369000 | -2.572832000 | -0.373200000 |
| Rh | -0.566071000 | -0.200022000 | -0.098804000 |
| O  | 3.077086000  | -1.426143000 | -0.175336000 |
| B  | 2.808329000  | -0.087163000 | -0.269390000 |
| O  | 3.859175000  | 0.736100000  | 0.037828000  |
| O  | 1.574912000  | 0.377516000  | -0.659318000 |
| H  | 1.495893000  | 1.350282000  | -0.664023000 |
| C  | -0.762748000 | 1.832869000  | 0.020933000  |
| C  | -0.684177000 | 2.599645000  | -1.165518000 |
| C  | -0.824159000 | 2.558417000  | 1.231035000  |
| C  | -0.673363000 | 4.000700000  | -1.146293000 |
| H  | -0.653600000 | 2.094415000  | -2.131457000 |
| C  | -0.807384000 | 3.956613000  | 1.257552000  |
| H  | -0.880948000 | 2.022988000  | 2.177575000  |
| C  | -0.734042000 | 4.685697000  | 0.067873000  |
| H  | -0.622843000 | 4.553715000  | -2.082491000 |
| H  | -0.852417000 | 4.478709000  | 2.211654000  |
| H  | -0.725381000 | 5.772714000  | 0.088049000  |
| C  | 4.995062000  | -0.108781000 | 0.285326000  |
| C  | 4.415324000  | -1.549106000 | 0.333502000  |
| H  | 4.973737000  | -2.253046000 | -0.290078000 |
| H  | 4.369257000  | -1.945144000 | 1.354003000  |
| H  | 5.468334000  | 0.190921000  | 1.224548000  |
| H  | 5.716034000  | 0.023526000  | -0.529077000 |

 $E_g(\text{B3LYP}/6\text{-}31\text{G}(\text{d})) = -984.17154$  $G_g(\text{B3LYP}/6\text{-}31\text{G}(\text{d})) = -983.86445$  $E_s(\text{M06}/6\text{-}311\text{G}(\text{d,p})//\text{B3LYP}/6\text{-}31\text{G}(\text{d})) = -983.77054$  $G_s(\text{M06}/6\text{-}311\text{G}(\text{d,p})//\text{B3LYP}/6\text{-}31\text{G}(\text{d})) = -983.46345$ With Ph-B(O-C<sub>2</sub>H<sub>4</sub>-O)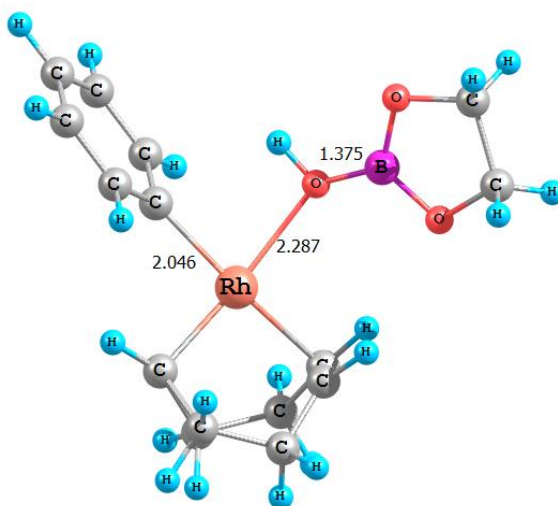

**C**

|    |              |              |              |
|----|--------------|--------------|--------------|
| C  | -2.931582000 | -0.851504000 | 1.079850000  |
| C  | -0.641301000 | -2.404884000 | 0.302726000  |
| C  | -0.874225000 | -2.251397000 | -1.053930000 |
| C  | -3.308945000 | -0.930487000 | -0.287722000 |
| C  | -2.136891000 | -2.642817000 | -1.800682000 |
| C  | -3.443120000 | -2.235299000 | -1.076006000 |
| C  | -2.542842000 | -2.018579000 | 1.970577000  |
| C  | -1.611715000 | -3.048143000 | 1.282637000  |
| H  | 0.385367000  | -2.287694000 | 0.644343000  |
| H  | -0.009042000 | -2.052821000 | -1.686960000 |
| H  | -3.300957000 | 0.011653000  | 1.634167000  |
| H  | -3.914946000 | -0.108166000 | -0.666510000 |
| H  | -3.439555000 | -2.526457000 | 2.362696000  |
| H  | -1.042329000 | -3.582682000 | 2.052553000  |
| H  | -2.146458000 | -3.724021000 | -2.013420000 |
| H  | -4.237403000 | -2.120996000 | -1.823083000 |
| H  | -2.206608000 | -3.810550000 | 0.768523000  |
| H  | -2.024987000 | -1.601587000 | 2.843858000  |
| H  | -2.105971000 | -2.142312000 | -2.775926000 |
| H  | -3.776247000 | -3.039116000 | -0.409513000 |
| Rh | -1.312704000 | -0.254831000 | -0.118226000 |
| O  | 2.493617000  | -0.899498000 | -0.286325000 |
| B  | 2.015641000  | 0.377520000  | -0.383095000 |
| O  | 2.941091000  | 1.358753000  | -0.154582000 |
| O  | 0.701250000  | 0.642201000  | -0.702114000 |
| H  | 0.484213000  | 1.592963000  | -0.720765000 |
| C  | -1.817625000 | 1.720626000  | 0.042886000  |
| C  | -1.921913000 | 2.511774000  | -1.124890000 |
| C  | -1.927309000 | 2.404689000  | 1.273627000  |
| C  | -2.126041000 | 3.896964000  | -1.068302000 |
| H  | -1.864367000 | 2.035786000  | -2.104264000 |
| C  | -2.126208000 | 3.787585000  | 1.337225000  |
| H  | -1.850646000 | 1.848190000  | 2.206585000  |
| C  | -2.228347000 | 4.541392000  | 0.165196000  |
| H  | -2.210606000 | 4.468825000  | -1.990660000 |
| H  | -2.202546000 | 4.277924000  | 2.306134000  |
| H  | -2.387172000 | 5.615906000  | 0.213887000  |
| C  | 4.240384000  | 0.693490000  | -0.096224000 |
| C  | 3.838840000  | -0.793334000 | 0.272254000  |
| C  | 5.100084000  | 1.410981000  | 0.941216000  |
| H  | 6.064309000  | 0.904810000  | 1.064394000  |
| H  | 5.295868000  | 2.435609000  | 0.609555000  |
| H  | 4.603799000  | 1.460536000  | 1.912887000  |
| C  | 4.864784000  | 0.826955000  | -1.490729000 |
| H  | 4.924920000  | 1.887716000  | -1.752833000 |
| H  | 5.875229000  | 0.406621000  | -1.520996000 |
| H  | 4.257488000  | 0.323935000  | -2.250230000 |
| C  | 4.707765000  | -1.876218000 | -0.362403000 |
| H  | 5.742889000  | -1.800238000 | -0.010512000 |
| H  | 4.326772000  | -2.863005000 | -0.080787000 |
| H  | 4.703324000  | -1.811874000 | -1.452753000 |
| C  | 3.710513000  | -1.030083000 | 1.782325000  |
| H  | 3.250980000  | -2.008847000 | 1.951560000  |
| H  | 4.687868000  | -1.019956000 | 2.275721000  |
| H  | 3.076796000  | -0.272290000 | 2.254371000  |

 $E_g(\text{B3LYP}/6\text{-}31\text{G}(\text{d})) = -1141.44151$ 
 $G_g(\text{B3LYP}/6\text{-}31\text{G}(\text{d})) = -1141.02763$ 
 $E_s(\text{M06}/6\text{-}311\text{G}(\text{d,p})//\text{B3LYP}/6\text{-}31\text{G}(\text{d})) = -1140.95983$ 
 $G_s(\text{M06}/6\text{-}311\text{G}(\text{d,p})//\text{B3LYP}/6\text{-}31\text{G}(\text{d})) = -1140.54595$ 

 With Ph-B(O-C<sub>2</sub>(Me)<sub>2</sub>H<sub>4</sub>-O)
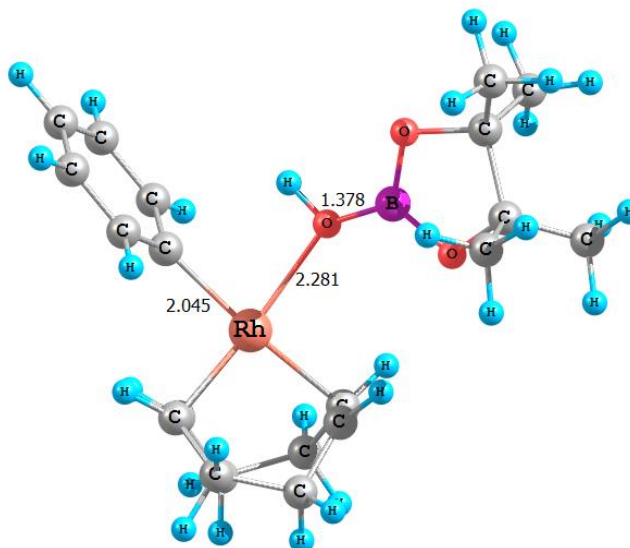

# C<sub>60</sub>

|   |              |              |              |
|---|--------------|--------------|--------------|
| C | 3.459098000  | -0.327925000 | 0.726729000  |
| C | 3.187913000  | 1.027483000  | 1.175870000  |
| C | 2.928449000  | -1.413717000 | 1.424603000  |
| C | 3.459098000  | -0.327925000 | -0.726729000 |
| C | 2.396623000  | 1.243315000  | 2.304990000  |
| C | 3.020489000  | 1.865222000  | 0.000000000  |
| C | 2.104155000  | -1.188943000 | 2.600436000  |
| C | 2.375328000  | -2.544483000 | 0.697868000  |
| C | 3.187913000  | 1.027483000  | -1.175870000 |
| C | 2.928449000  | -1.413717000 | -1.424603000 |
| C | 1.843966000  | 0.112632000  | 3.032082000  |
| C | 1.405022000  | 2.306074000  | 2.305179000  |
| C | 2.068024000  | 2.885489000  | 0.000000000  |
| C | 1.041678000  | -2.180820000 | 2.600414000  |
| C | 1.209331000  | -3.018773000 | 1.424647000  |
| C | 2.375328000  | -2.544483000 | -0.697868000 |
| C | 2.396623000  | 1.243315000  | -2.304990000 |
| C | 2.104155000  | -1.188943000 | -2.600436000 |
| C | 0.510126000  | 0.476253000  | 3.480910000  |
| C | 0.238865000  | 1.831545000  | 3.031553000  |
| C | 1.244057000  | 3.110542000  | 1.175960000  |
| C | 1.244057000  | 3.110542000  | -1.175960000 |
| C | -0.238869000 | -1.831545000 | 3.031547000  |
| C | 0.089605000  | -3.474267000 | 0.726802000  |
| C | 1.209331000  | -3.018773000 | -1.424647000 |
| C | 1.843966000  | 0.112632000  | -3.032082000 |
| C | 1.405022000  | 2.306074000  | -2.305179000 |
| C | 1.041678000  | -2.180820000 | -2.600414000 |
| C | -0.510124000 | -0.476256000 | 3.480905000  |
| C | -1.041675000 | 2.180818000  | 2.600411000  |
| C | -0.089607000 | 3.474266000  | 0.726801000  |
| C | -1.405023000 | -2.306083000 | 2.305186000  |
| C | 0.089605000  | -3.474267000 | -0.726802000 |
| C | -1.244050000 | -3.110537000 | 1.175956000  |
| C | 0.510126000  | 0.476253000  | -3.480910000 |
| C | 0.238865000  | 1.831545000  | -3.031553000 |
| C | -0.238869000 | -1.831545000 | -3.031547000 |
| C | -1.843966000 | -0.112632000 | 3.032083000  |
| C | -2.104161000 | 1.188942000  | 2.600432000  |
| C | -1.209331000 | 3.018776000  | 1.424644000  |
| C | -1.209331000 | 3.018776000  | -1.424644000 |
| C | -2.396633000 | -1.243313000 | 2.304992000  |
| C | -1.244050000 | -3.110537000 | -1.175956000 |
| C | -2.068019000 | -2.885489000 | 0.000000000  |
| C | -0.510124000 | -0.476256000 | -3.480905000 |
| C | -1.041675000 | 2.180818000  | -2.600411000 |
| C | -1.405023000 | -2.306083000 | -2.305186000 |
| C | -2.928447000 | 1.413724000  | 1.424603000  |
| C | -2.375329000 | 2.544483000  | 0.697871000  |
| C | -2.375329000 | 2.544483000  | -0.697871000 |
| C | -3.187910000 | -1.027483000 | 1.175873000  |
| C | -3.020489000 | -1.865221000 | 0.000000000  |
| C | -1.843966000 | -0.112632000 | -3.032083000 |
| C | -2.104161000 | 1.188942000  | -2.600432000 |
| C | -2.396633000 | -1.243313000 | -2.304992000 |
| C | -3.459094000 | 0.327925000  | 0.726726000  |
| C | -2.928447000 | 1.413724000  | -1.424603000 |
| C | -3.187910000 | -1.027483000 | -1.175873000 |
| C | -3.459094000 | 0.327925000  | -0.726726000 |

$E_g(\text{B3LYP}/6\text{-}31\text{G}(\text{d})) = -2286.12812$

$G_g(\text{B3LYP}/6\text{-}31\text{G}(\text{d})) = -2285.79613$

$E_s(\text{M06}/6\text{-}311\text{G}(\text{d,p})//\text{B3LYP}/6\text{-}31\text{G}(\text{d})) = -2284.98121$

$G_s(\text{M06}/6\text{-}311\text{G}(\text{d,p})//\text{B3LYP}/6\text{-}31\text{G}(\text{d})) = -2284.64922$

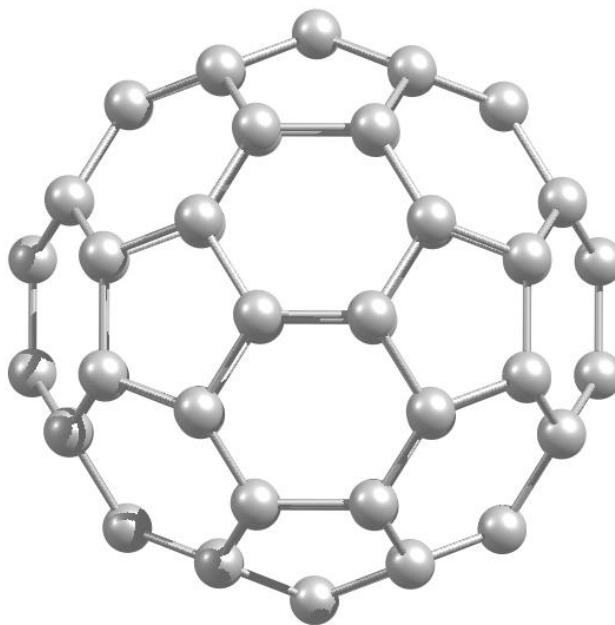

# D

|    |              |              |              |
|----|--------------|--------------|--------------|
| C  | 0.805383000  | 0.603332000  | 1.418426000  |
| C  | 2.321543000  | 0.799568000  | -1.026880000 |
| C  | 2.203767000  | -0.548977000 | -1.324727000 |
| C  | 0.915449000  | -0.813880000 | 1.242866000  |
| C  | 2.647520000  | -1.703086000 | -0.440655000 |
| C  | 2.241092000  | -1.553669000 | 1.048772000  |
| C  | 1.953436000  | 1.596306000  | 1.382708000  |
| C  | 2.968334000  | 1.351215000  | 0.235352000  |
| H  | 2.175655000  | 1.509389000  | -1.841885000 |
| H  | 2.003585000  | -0.816643000 | -2.364560000 |
| H  | -0.053500000 | 0.953142000  | 1.992061000  |
| H  | 0.120919000  | -1.410708000 | 1.690970000  |
| H  | 2.481597000  | 1.609673000  | 2.350321000  |
| H  | 3.469805000  | 2.296585000  | -0.001767000 |
| H  | 3.735785000  | -1.854701000 | -0.516118000 |
| H  | 2.159924000  | -2.554087000 | 1.488736000  |
| H  | 3.757037000  | 0.669744000  | 0.570866000  |
| H  | 1.515051000  | 2.595025000  | 1.264891000  |
| H  | 2.186472000  | -2.613896000 | -0.840290000 |
| H  | 3.033076000  | -1.044924000 | 1.610495000  |
| Rh | 0.208028000  | 0.080038000  | -0.512707000 |
| C  | -1.739935000 | 0.000328000  | -0.033766000 |
| C  | -2.428571000 | -1.194355000 | 0.259920000  |
| C  | -2.513612000 | 1.168056000  | -0.211424000 |
| C  | -3.825149000 | -1.230302000 | 0.327861000  |
| H  | -1.871921000 | -2.115413000 | 0.424382000  |
| C  | -3.909903000 | 1.135515000  | -0.140017000 |
| H  | -2.022076000 | 2.121538000  | -0.407330000 |
| C  | -4.570165000 | -0.065876000 | 0.128842000  |
| H  | -4.331566000 | -2.169346000 | 0.542217000  |
| H  | -4.480967000 | 2.050311000  | -0.285220000 |
| H  | -5.655262000 | -0.092445000 | 0.190365000  |

$E_g(\text{B3LYP}/6\text{-}31\text{G}(\text{d})) = -654.27314$

$E_g(\text{B3LYP}/6\text{-}31\text{G}(\text{d})) = -654.04260$

$E_s(\text{M06}/6\text{-}311\text{G}(\text{d},\text{p})//\text{B3LYP}/6\text{-}31\text{G}(\text{d})) = -653.94643$

$E_s(\text{M06}/6\text{-}311\text{G}(\text{d},\text{p})//\text{B3LYP}/6\text{-}31\text{G}(\text{d})) = -653.71589$

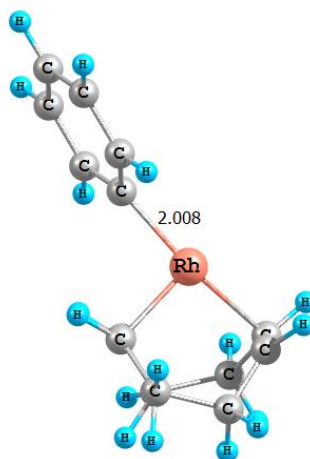

# B(OH)<sub>3</sub>

|   |              |              |              |
|---|--------------|--------------|--------------|
| O | 1.240295000  | -0.586677000 | -0.000173000 |
| H | 1.165651000  | -1.551412000 | 0.001289000  |
| B | -0.000061000 | -0.000066000 | -0.000042000 |
| O | -0.111940000 | 1.367335000  | -0.000075000 |
| H | 0.760918000  | 1.784790000  | 0.000090000  |
| O | -1.128351000 | -0.780619000 | -0.000088000 |
| H | -1.926298000 | -0.233363000 | 0.000698000  |

$E_g(\text{B3LYP}/6\text{-}31\text{G}(\text{d})) = -252.47085$

$G_g(\text{B3LYP}/6\text{-}31\text{G}(\text{d})) = -252.44858$

$E_s(\text{M06}/6\text{-}311\text{G}(\text{d,p})//\text{B3LYP}/6\text{-}31\text{G}(\text{d})) = -252.45916$

$G_s(\text{M06}/6\text{-}311\text{G}(\text{d,p})//\text{B3LYP}/6\text{-}31\text{G}(\text{d})) = -252.43689$

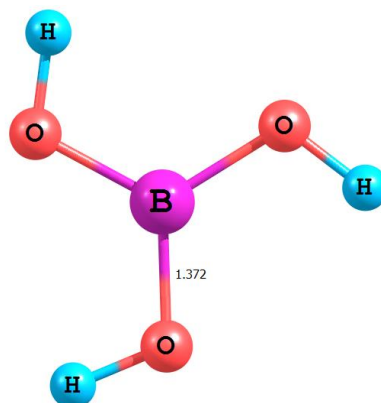

**B(OH)-(O-C<sub>2</sub>H<sub>4</sub>-O)**

|   |              |              |              |
|---|--------------|--------------|--------------|
| O | -0.023906000 | -1.167162000 | 0.064686000  |
| B | 0.766975000  | -0.045518000 | 0.001210000  |
| O | 0.057443000  | 1.138453000  | -0.062765000 |
| O | 2.124876000  | -0.116984000 | 0.001604000  |
| H | 2.515005000  | 0.768061000  | -0.019850000 |
| C | -1.330156000 | 0.807181000  | 0.070818000  |
| C | -1.381929000 | -0.737626000 | -0.072255000 |
| H | -1.995438000 | -1.213972000 | 0.699143000  |
| H | -1.758426000 | -1.048083000 | -1.054819000 |
| H | -1.905828000 | 1.325487000  | -0.702594000 |
| H | -1.684984000 | 1.144313000  | 1.052489000  |

 $E_g(\text{B3LYP}/6\text{-}31\text{G}(\text{d})) = -329.87133$  $G_g(\text{B3LYP}/6\text{-}31\text{G}(\text{d})) = -329.81501$  $E_s(\text{M06}/6\text{-}311\text{G}(\text{d,p})//\text{B3LYP}/6\text{-}31\text{G}(\text{d})) = -329.80040$  $G_s(\text{M06}/6\text{-}311\text{G}(\text{d,p})//\text{B3LYP}/6\text{-}31\text{G}(\text{d})) = -329.74408$ 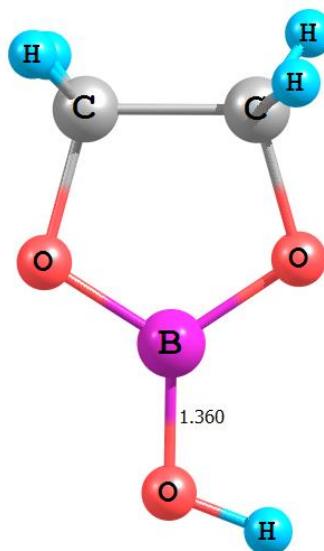

**B(OH)-(O-C<sub>2</sub>(Me)<sub>2</sub>H<sub>4</sub>-O)**

|   |              |              |              |
|---|--------------|--------------|--------------|
| O | -0.802062000 | -1.114604000 | -0.418381000 |
| B | -1.594531000 | -0.068082000 | -0.015653000 |
| O | -0.884020000 | 1.040681000  | 0.399004000  |
| O | -2.954775000 | -0.138868000 | -0.030183000 |
| H | -3.340150000 | 0.705629000  | 0.243482000  |
| C | 0.506947000  | 0.800696000  | 0.046462000  |
| C | 0.559612000  | -0.777819000 | -0.044367000 |
| C | 1.393587000  | 1.421206000  | 1.124538000  |
| H | 2.451458000  | 1.210372000  | 0.929692000  |
| H | 1.261358000  | 2.508175000  | 1.128702000  |
| H | 1.140758000  | 1.047534000  | 2.119519000  |
| C | 0.749446000  | 1.493083000  | -1.301573000 |
| H | 0.491479000  | 2.552767000  | -1.208005000 |
| H | 1.796879000  | 1.420139000  | -1.612644000 |
| H | 0.123626000  | 1.060202000  | -2.088672000 |
| C | 1.503957000  | -1.335625000 | -1.108034000 |
| H | 2.542663000  | -1.057449000 | -0.895173000 |
| H | 1.441084000  | -2.428575000 | -1.115509000 |
| H | 1.243167000  | -0.977868000 | -2.106758000 |
| C | 0.831204000  | -1.451746000 | 1.307948000  |
| H | 0.649131000  | -2.526425000 | 1.210261000  |
| H | 1.866099000  | -1.304389000 | 1.634773000  |
| H | 0.163529000  | -1.066147000 | 2.085246000  |

 $E_g(\text{B3LYP}/6\text{-}31\text{G}(\text{d})) = -487.14028$  $G_g(\text{B3LYP}/6\text{-}31\text{G}(\text{d})) = -486.97741$  $E_s(\text{M06}/6\text{-}311\text{G}(\text{d},\text{p})//\text{B3LYP}/6\text{-}31\text{G}(\text{d})) = -486.98941$  $G_s(\text{M06}/6\text{-}311\text{G}(\text{d},\text{p})//\text{B3LYP}/6\text{-}31\text{G}(\text{d})) = -486.82654$ 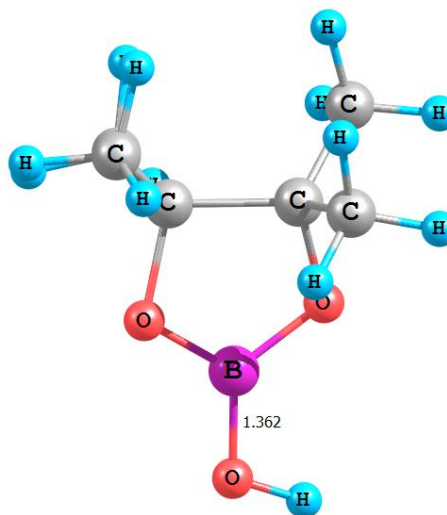



# E

|    |             |             |             |
|----|-------------|-------------|-------------|
| C  | -5.51099200 | -0.53636900 | 1.34461100  |
| C  | -4.07491100 | -2.67023900 | -0.00587500 |
| C  | -4.44745400 | -2.24283700 | -1.25988500 |
| C  | -6.14387300 | -0.32024800 | 0.09559900  |
| C  | -5.86383000 | -2.05151400 | -1.77131900 |
| C  | -6.82209400 | -1.39712400 | -0.75041200 |
| C  | -5.35600600 | -1.86489100 | 2.05609900  |
| C  | -5.01710300 | -3.05089700 | 1.12148300  |
| H  | -3.04056400 | -2.96511700 | 0.12975800  |
| H  | -3.68403500 | -2.26411300 | -2.03693000 |
| H  | -5.46017300 | 0.32347900  | 2.01074300  |
| H  | -6.50826900 | 0.68980100  | -0.08029800 |
| H  | -6.26861700 | -2.09400400 | 2.63037300  |
| H  | -4.55023500 | -3.84410700 | 1.71680800  |
| H  | -6.27392400 | -3.01427800 | -2.11590000 |
| H  | -7.65473100 | -0.94150300 | -1.29844900 |
| H  | -5.93476600 | -3.48389300 | 0.71202800  |
| H  | -4.55368800 | -1.75250100 | 2.79553500  |
| H  | -5.80959200 | -1.41133600 | -2.66014900 |
| H  | -7.27335700 | -2.15805200 | -0.10434600 |
| Rh | -4.00028700 | -0.26749300 | -0.15022700 |
| C  | -4.15415000 | 1.75621200  | 0.03837500  |
| C  | -4.37718600 | 2.46262400  | -1.16094000 |
| C  | -4.12019200 | 2.50795500  | 1.22567500  |
| C  | -4.53229900 | 3.85268900  | -1.17686100 |
| H  | -4.42832900 | 1.92371500  | -2.10743200 |
| C  | -4.27767200 | 3.89938000  | 1.21665600  |
| H  | -3.94791900 | 2.01241500  | 2.17914700  |
| C  | -4.48213000 | 4.57916500  | 0.01545000  |
| H  | -4.69630700 | 4.36586800  | -2.12233400 |
| H  | -4.23730500 | 4.45058600  | 2.15416100  |
| H  | -4.60425000 | 5.65927200  | 0.00719700  |
| C  | 4.09412500  | 1.02417500  | 2.58323100  |
| C  | 3.09109400  | 2.07685000  | 2.59078200  |
| C  | 1.79456700  | 1.80009000  | 3.02780700  |
| C  | 1.44798900  | 0.46383700  | 3.48098300  |
| C  | 2.41213500  | -0.54593700 | 3.47650100  |
| C  | 3.76143700  | -0.25985800 | 3.01611000  |
| C  | 4.92009300  | 1.20112100  | 1.39966000  |
| C  | 4.42983900  | 2.36304300  | 0.67849000  |
| C  | 3.29964500  | 2.90470700  | 1.41447500  |
| C  | 2.20360800  | 3.42556000  | 0.72501300  |
| C  | 0.65366800  | 2.34039000  | 2.30844000  |
| C  | 0.09207000  | 0.17909300  | 3.04236000  |
| C  | -0.24980000 | -1.10101600 | 2.61276600  |
| C  | 0.75424800  | -2.15171800 | 2.60727800  |
| C  | 2.05777500  | -1.88129900 | 3.02953900  |
| C  | 3.18680300  | -2.42197100 | 2.29220000  |
| C  | 4.24116800  | -1.42077000 | 2.28437800  |
| C  | 5.03344100  | -1.25110900 | 1.14815200  |
| C  | 5.38167100  | 0.08638300  | 0.69704600  |
| C  | 4.41922900  | 2.36439200  | -0.71798300 |
| C  | 4.89861200  | 1.20421600  | -1.44884900 |
| C  | 5.37027000  | 0.08786900  | -0.75559500 |
| C  | 5.01546600  | -1.24914600 | -1.20408700 |
| C  | 4.80662300  | -2.07627400 | -0.02710000 |
| C  | 3.79545100  | -3.03744400 | -0.02011000 |
| C  | 2.96882600  | -3.21349100 | 1.16262400  |
| C  | 1.61235300  | -3.48974400 | 0.72400800  |
| C  | 0.52991200  | -2.96993900 | 1.43107400  |
| C  | -0.40006700 | 1.34086100  | 2.31429600  |
| C  | -1.11583600 | -1.27443700 | -1.40519500 |
| C  | -1.66642700 | -0.16169700 | -0.71568100 |
| C  | -1.23149600 | 1.17569700  | -1.15103200 |
| C  | -0.43747100 | 1.34711800  | -2.28193000 |
| C  | 0.04702800  | 0.18576300  | -3.01429100 |
| C  | 0.71551700  | -2.14968800 | -2.59981900 |
| C  | 0.50804600  | -2.97106800 | -1.42205100 |
| C  | -0.62527700 | -2.42327200 | -0.68896100 |
| C  | -0.61235500 | -2.41754800 | 0.71507400  |
| C  | -1.10389800 | -1.27677200 | 1.44588500  |
| C  | -1.64170500 | -0.16122800 | 0.76419200  |
| C  | -0.99245000 | 1.99034100  | 0.02139100  |
| C  | 0.01237300  | 2.95883300  | 0.01405900  |
| C  | 0.83645300  | 3.14242300  | -1.16661800 |
| C  | 0.61768700  | 2.34663800  | -2.29097500 |
| C  | 1.74778400  | 1.80700000  | -3.02800400 |
| C  | 1.39507400  | 0.47165400  | -3.47723000 |
| C  | 2.35836400  | -0.53863700 | -3.48749700 |
| C  | 2.01176700  | -1.87704100 | -3.03977200 |
| C  | 1.60161800  | -3.49102600 | -0.73298400 |
| C  | 2.95101800  | -3.21195800 | -1.19067500 |
| C  | 3.15268000  | -2.41921900 | -2.32261600 |
| C  | 4.20603900  | -1.41694700 | -2.32834700 |
| C  | 3.71504000  | -0.25242300 | -3.05001800 |
| C  | 4.05337700  | 1.02908300  | -2.61923300 |
| C  | 3.05115600  | 2.08238600  | -2.61027800 |
| C  | 3.27808300  | 2.90802100  | -1.43594400 |
| C  | 2.19263300  | 3.42732900  | -0.72910500 |
| C  | -1.21041200 | 1.17172100  | 1.19546000  |
| C  | 0.85459500  | 3.13896800  | 1.18189700  |
| C  | -0.28795700 | -1.09784400 | -2.58679800 |

$$E_g(\text{B3LYP}/6\text{-}31\text{G}(\text{d})) = -2940.41188$$

$$G_g(\text{B3LYP}/6\text{-}31\text{G}(\text{d})) = -2939.82758$$

$$E_s(\text{M06}/6\text{-}311\text{G}(\text{d},\text{p})//\text{B3LYP}/6\text{-}31\text{G}(\text{d})) = -2938.95319$$

$$G_s(\text{M06}/6\text{-}311\text{G}(\text{d},\text{p})//\text{B3LYP}/6\text{-}31\text{G}(\text{d})) = -2938.36889$$

In [5,6] bond

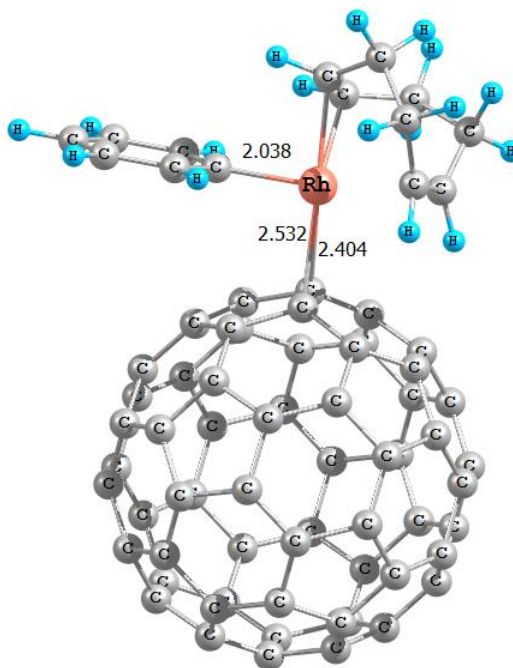

# E-F

|    |              |              |              |
|----|--------------|--------------|--------------|
| C  | -5.510992000 | -0.536369000 | 1.344611000  |
| C  | -4.074911000 | -2.670239000 | -0.005875000 |
| C  | -4.447454000 | -2.242837000 | -1.259885000 |
| C  | -6.143873000 | -0.320248000 | 0.095599000  |
| C  | -5.863830000 | -2.051514000 | -1.771319000 |
| C  | -6.822094000 | -1.397124000 | -0.750412000 |
| C  | -5.356006000 | -1.864891000 | 2.056099000  |
| C  | -5.017103000 | -3.050897000 | 1.121483000  |
| H  | -3.040564000 | -2.965117000 | 0.129758000  |
| H  | -3.684035000 | -2.264113000 | -2.036930000 |
| H  | -5.460173000 | 0.323479000  | 2.010743000  |
| H  | -6.508269000 | 0.689801000  | -0.080298000 |
| H  | -6.268617000 | -2.094004000 | 2.630373000  |
| H  | -4.550235000 | -3.844107000 | 1.716808000  |
| H  | -6.273924000 | -3.014278000 | -2.115900000 |
| H  | -7.654731000 | -0.941503000 | -1.298449000 |
| H  | -5.934766000 | -3.483893000 | 0.712028000  |
| H  | -4.553688000 | -1.752501000 | 2.795535000  |
| H  | -5.809592000 | -1.411336000 | -2.660149000 |
| H  | -7.273357000 | -2.158052000 | -0.104346000 |
| Rh | -4.000287000 | -0.267493000 | -0.150227000 |
| C  | -4.154150000 | 1.756212000  | 0.038375000  |
| C  | -4.377186000 | 2.462624000  | -1.160940000 |
| C  | -4.120192000 | 2.507955000  | 1.225675000  |
| C  | -4.532299000 | 3.852689000  | -1.176861000 |
| H  | -4.428329000 | 1.923715000  | -2.107432000 |
| C  | -4.277672000 | 3.899380000  | 1.216656000  |
| H  | -3.947919000 | 2.012415000  | 2.179147000  |
| C  | -4.482130000 | 4.579165000  | 0.015450000  |
| H  | -4.696307000 | 4.365868000  | -2.122334000 |
| H  | -4.237305000 | 4.450586000  | 2.154161000  |
| H  | -4.604250000 | 5.659272000  | 0.007197000  |
| C  | 4.094125000  | 1.024175000  | 2.583231000  |
| C  | 3.091094000  | 2.076850000  | 2.590782000  |
| C  | 1.794567000  | 1.800090000  | 3.027807000  |
| C  | 1.447989000  | 0.463837000  | 3.480983000  |
| C  | 2.412135000  | -0.545937000 | 3.476501000  |
| C  | 3.761437000  | -0.259858000 | 3.016110000  |
| C  | 4.920093000  | 1.201121000  | 1.399660000  |
| C  | 4.429839000  | 2.630430000  | 0.678490000  |
| C  | 3.299645000  | 2.904707000  | 1.414475000  |
| C  | 2.203608000  | 3.425560000  | 0.725013000  |
| C  | 0.653668000  | 2.340390000  | 2.308444000  |
| C  | 0.092070000  | 0.179093000  | 3.042360000  |
| C  | -0.249800000 | -1.101016000 | 2.612766000  |
| C  | 0.754248000  | -2.151718000 | 2.607278000  |
| C  | 2.057775000  | -1.881299000 | 3.029539000  |
| C  | 3.186803000  | -2.421971000 | 2.292200000  |
| C  | 4.241168000  | -1.420770000 | 2.284378000  |
| C  | 5.033441000  | -1.251109000 | 1.148152000  |
| C  | 5.381671000  | 0.086383000  | 0.697046000  |
| C  | 4.419229000  | 2.364392000  | -0.717983000 |
| C  | 4.898612000  | 1.204216000  | -1.448849000 |
| C  | 5.370270000  | 0.087869000  | -0.755595000 |
| C  | 5.015466000  | -1.249146000 | -1.204087000 |
| C  | 4.806622000  | -2.076274000 | -0.027100000 |
| C  | 3.795451000  | -3.037744000 | -0.020110000 |
| C  | 2.968826000  | -3.213491000 | 1.162624000  |
| C  | 1.612353000  | -3.489744000 | 0.724008000  |
| C  | 0.529912000  | -2.969939000 | 1.431074000  |
| C  | -0.400067000 | 1.340861000  | 2.314296000  |
| C  | -1.115836000 | -1.274437000 | -1.405195000 |
| C  | -1.666427000 | -0.161697000 | -0.715681000 |
| C  | -1.231496000 | 1.175697000  | -1.151032000 |
| C  | -0.437471000 | 1.347118000  | -2.281930000 |
| C  | 0.047028000  | 0.185763000  | -3.014291000 |
| C  | 0.715517000  | -2.149688000 | -2.599819000 |
| C  | 0.508046000  | -2.971068000 | -1.422051000 |
| C  | -0.625277000 | -2.423272000 | -0.688961000 |
| C  | -0.612355000 | -2.417548000 | 0.715074000  |
| C  | -1.103898000 | -1.276772000 | 1.445885000  |
| C  | -1.641705000 | -0.161228000 | 0.764192000  |
| C  | -0.992450000 | 1.990341000  | 0.021391000  |
| C  | 0.012373000  | 2.958833000  | 0.014059000  |
| C  | 0.836453000  | 3.142423000  | -1.166618000 |
| C  | 0.617687000  | 2.346638000  | -2.290975000 |
| C  | 1.747784000  | 1.807000000  | -3.028004000 |
| C  | 1.395074000  | 0.471654000  | -3.477230000 |
| C  | 2.358364000  | -0.538637000 | -3.487497000 |
| C  | 2.011767000  | -1.877041000 | -3.039772000 |
| C  | 1.601618000  | -3.491026000 | -0.732984000 |
| C  | 2.951018000  | -3.211958000 | -1.190675000 |
| C  | 3.152680000  | -2.419219000 | -2.322616000 |
| C  | 4.206039000  | -1.416947000 | -2.328347000 |
| C  | 3.715040000  | -0.252424000 | -3.050018000 |
| C  | 4.053377000  | 1.029083000  | -2.619233000 |
| C  | 3.051156000  | 2.082386000  | -2.610278000 |
| C  | 3.278083000  | 2.908021000  | -1.435944000 |
| C  | 2.192633000  | 3.427329000  | -0.729105000 |
| C  | -1.210412000 | 1.171721000  | 1.195460000  |
| C  | 0.854595000  | 3.138968000  | 1.181897000  |
| C  | -0.287957000 | -1.097844000 | -2.586798000 |

$E_g(\text{B3LYP}/6\text{-}31\text{G}(\text{d})) = -2940.38250$

$G_g(\text{B3LYP}/6\text{-}31\text{G}(\text{d})) = -2939.79685$

$E_s(\text{M06}/6\text{-}311\text{G}(\text{d},\text{p})//\text{B3LYP}/6\text{-}31\text{G}(\text{d})) = -2938.92844$

$G_s(\text{M06}/6\text{-}311\text{G}(\text{d},\text{p})//\text{B3LYP}/6\text{-}31\text{G}(\text{d})) = -2938.34279$

In [5,6] bond

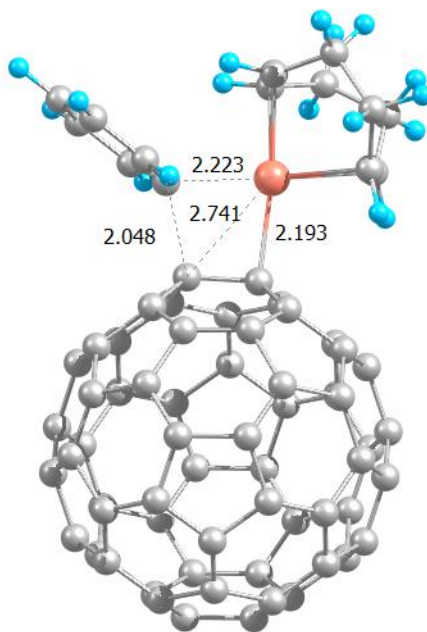

**E**

|    |              |              |              |
|----|--------------|--------------|--------------|
| C  | -5.725768000 | -0.400602000 | 1.108908000  |
| C  | -4.145926000 | -2.671948000 | 0.271466000  |
| C  | -4.246948000 | -2.349149000 | -1.067926000 |
| C  | -6.082757000 | -0.298768000 | -0.243678000 |
| C  | -5.518208000 | -2.174339000 | -1.870878000 |
| C  | -6.631011000 | -1.423284000 | -1.112020000 |
| C  | -5.753689000 | -1.650624000 | 1.962440000  |
| C  | -5.301100000 | -2.928433000 | 1.222287000  |
| H  | -3.174991000 | -2.999471000 | 0.628808000  |
| H  | -3.352287000 | -2.475144000 | -1.673637000 |
| H  | -5.739241000 | 0.523323000  | 1.682101000  |
| H  | -6.305400000 | 0.702554000  | -0.601210000 |
| H  | -6.762857000 | -1.793353000 | 2.381775000  |
| H  | -4.987663000 | -3.672775000 | 1.962780000  |
| H  | -5.882172000 | -3.154862000 | -2.216579000 |
| H  | -7.328461000 | -0.995672000 | -1.841037000 |
| H  | -6.141175000 | -3.376165000 | 0.683071000  |
| H  | -5.090431000 | -1.480730000 | 2.818835000  |
| H  | -5.261945000 | -1.609130000 | -2.774755000 |
| H  | -7.220845000 | -2.117894000 | -0.505357000 |
| Rh | -3.860973000 | -0.321696000 | -0.037507000 |
| C  | -4.092266000 | 1.750507000  | 0.017293000  |
| C  | -4.282293000 | 2.436415000  | -1.195280000 |
| C  | -4.155959000 | 2.500740000  | 1.202678000  |
| C  | -4.538303000 | 3.812168000  | -1.221324000 |
| H  | -4.230427000 | 1.895797000  | -2.138872000 |
| C  | -4.412446000 | 3.877408000  | 1.181133000  |
| H  | -3.990664000 | 2.016459000  | 2.163283000  |
| C  | -4.606488000 | 4.539824000  | -0.031415000 |
| H  | -4.682804000 | 4.313058000  | -2.176398000 |
| H  | -4.454910000 | 4.429668000  | 2.117690000  |
| H  | -4.804319000 | 5.608399000  | -0.050124000 |
| C  | 3.312382000  | 0.830317000  | -3.137740000 |
| C  | 2.642224000  | -0.423186000 | -3.444442000 |
| C  | 1.248487000  | -0.484000000 | -3.453292000 |
| C  | 0.463426000  | 0.704106000  | -3.161303000 |
| C  | 1.108242000  | 1.909139000  | -2.870356000 |
| C  | 2.559783000  | 1.972354000  | -2.855721000 |
| C  | 4.493010000  | 0.525005000  | -2.349756000 |
| C  | 4.555958000  | -0.917523000 | -2.172019000 |
| C  | 3.413317000  | -1.503780000 | -2.849168000 |
| C  | 2.759812000  | -2.604275000 | -2.291588000 |
| C  | 0.567085000  | -1.628821000 | -2.872855000 |
| C  | -0.704228000 | 0.299151000  | -2.402171000 |
| C  | -1.187000000 | 1.103868000  | -1.376302000 |
| C  | -0.506423000 | 2.342748000  | -1.061495000 |
| C  | 0.611661000  | 2.746548000  | -1.797494000 |
| C  | 1.754259000  | 3.335958000  | -1.118092000 |
| C  | 2.959769000  | 2.855410000  | -1.772423000 |
| C  | 4.095376000  | 2.561698000  | -1.015344000 |
| C  | 4.877146000  | 1.373117000  | -1.309632000 |
| C  | 5.000929000  | -1.452576000 | -0.961479000 |
| C  | 5.399246000  | -0.568674000 | 0.121515000  |
| C  | 5.338137000  | 0.815021000  | -0.048831000 |
| C  | 4.840681000  | 1.659612000  | 1.024611000  |
| C  | 4.073072000  | 2.738968000  | 0.427507000  |
| C  | 2.916005000  | 3.202897000  | 1.055340000  |
| C  | 1.733401000  | 3.506072000  | 0.266417000  |
| C  | 0.568654000  | 3.093294000  | 1.031600000  |
| C  | -0.525098000 | 2.516910000  | 0.379290000  |
| C  | -0.636702000 | -1.152190000 | -2.222814000 |
| C  | -0.712365000 | -0.593397000 | 2.345959000  |
| C  | -1.102269000 | -1.438078000 | 1.313149000  |
| C  | -0.307092000 | -2.610409000 | 1.014000000  |
| C  | 0.827783000  | -2.915114000 | 1.773307000  |
| C  | 1.224988000  | -2.038207000 | 2.854546000  |
| C  | 1.138395000  | 0.359334000  | 3.437514000  |
| C  | 0.369642000  | 1.439312000  | 2.841873000  |
| C  | -0.773365000 | 0.858774000  | 2.166898000  |
| C  | -1.211690000 | 1.386969000  | 0.961064000  |
| C  | -1.713198000 | 0.520409000  | -0.124185000 |
| C  | -1.657135000 | -0.902314000 | 0.048243000  |
| C  | -0.280488000 | -2.785866000 | -0.428040000 |
| C  | 0.874665000  | -3.261385000 | -1.056855000 |
| C  | 2.055632000  | -3.569538000 | -0.266732000 |
| C  | 2.032475000  | -3.399217000 | 1.117575000  |
| C  | 3.176373000  | -2.814349000 | 1.797210000  |
| C  | 2.676781000  | -1.971719000 | 2.870964000  |
| C  | 3.317143000  | -0.766762000 | 3.165673000  |
| C  | 2.531895000  | 0.422230000  | 3.457753000  |
| C  | 1.027396000  | 2.542414000  | 2.290194000  |
| C  | 2.478235000  | 2.605120000  | 2.306578000  |
| C  | 3.216354000  | 1.567441000  | 2.879691000  |
| C  | 4.420151000  | 1.085850000  | 2.226056000  |
| C  | 4.482494000  | -0.356963000 | 2.402885000  |
| C  | 4.963571000  | -1.167087000 | 1.372700000  |
| C  | 4.296948000  | -2.420400000 | 1.063380000  |
| C  | 4.320580000  | -2.596973000 | -0.379744000 |
| C  | 3.222674000  | -3.161787000 | -1.031337000 |
| C  | -1.054784000 | -1.721429000 | -1.025836000 |
| C  | 1.308467000  | -2.669181000 | -2.304976000 |
| C  | 0.469451000  | -0.894382000 | 3.129415000  |

$$E_g(\text{B3LYP}/6\text{-}31\text{G}(\text{d})) = -2940.41791$$

$$G_g(\text{B3LYP}/6\text{-}31\text{G}(\text{d})) = -2939.83211$$

$$E_s(\text{M06}/6\text{-}311\text{G}(\text{d},\text{p})//\text{B3LYP}/6\text{-}31\text{G}(\text{d})) = -2938.96673$$

$$G_s(\text{M06}/6\text{-}311\text{G}(\text{d},\text{p})//\text{B3LYP}/6\text{-}31\text{G}(\text{d})) = -2938.38093$$

In [6,6] bond

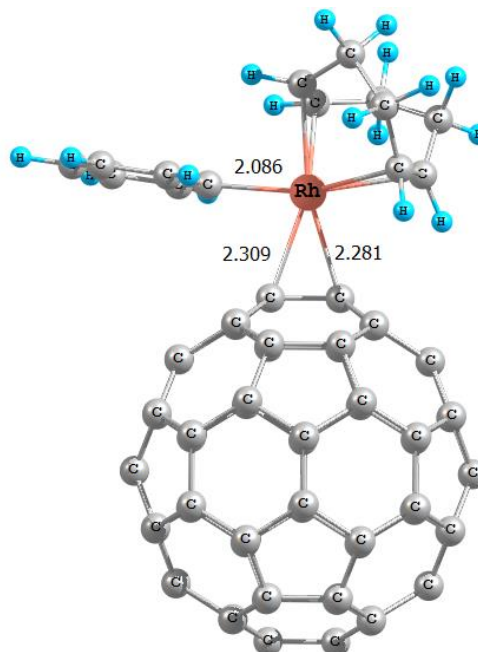

# E-F

|    |              |              |              |
|----|--------------|--------------|--------------|
| C  | -5.873718000 | -0.147010000 | 0.949932000  |
| C  | -4.344353000 | -2.528672000 | 0.475775000  |
| C  | -4.332001000 | -2.354467000 | -0.912453000 |
| C  | -6.088197000 | -0.137787000 | -0.428826000 |
| C  | -5.544096000 | -2.215012000 | -1.813588000 |
| C  | -6.649555000 | -1.304059000 | -1.232045000 |
| C  | -6.098813000 | -1.316456000 | 1.888085000  |
| C  | -5.600000000 | -2.668598000 | 1.327507000  |
| H  | -3.435043000 | -2.917375000 | 0.928454000  |
| H  | -3.423932000 | -2.646170000 | -1.437707000 |
| H  | -5.820360000 | 0.820206000  | 1.444897000  |
| H  | -6.155867000 | 0.836275000  | -0.907761000 |
| H  | -7.163741000 | -1.390540000 | 2.160818000  |
| H  | -5.386154000 | -3.341731000 | 2.165469000  |
| H  | -5.958073000 | -3.207370000 | -2.054089000 |
| H  | -7.253455000 | -0.909594000 | -2.057247000 |
| H  | -6.390198000 | -3.155799000 | 0.746600000  |
| H  | -5.562066000 | -1.098756000 | 2.819278000  |
| H  | -5.197781000 | -1.792922000 | -2.764773000 |
| H  | -7.336426000 | -1.888082000 | -0.610771000 |
| Rh | -3.902348000 | -0.401053000 | -0.015623000 |
| C  | -3.602777000 | 1.773052000  | 0.012402000  |
| C  | -3.912273000 | 2.379691000  | -1.221622000 |
| C  | -3.860566000 | 2.499842000  | 1.189148000  |
| C  | -4.531574000 | 3.629525000  | -1.272154000 |
| H  | -3.669840000 | 1.868981000  | -2.150667000 |
| C  | -4.472672000 | 3.754073000  | 1.140127000  |
| C  | -3.582113000 | 2.081167000  | 2.153342000  |
| C  | -4.814291000 | 4.321968000  | -0.090427000 |
| H  | -4.778643000 | 4.070190000  | -2.235065000 |
| H  | -4.673183000 | 4.292019000  | 2.063642000  |
| H  | -5.277523000 | 5.304083000  | -0.129784000 |
| C  | 3.440935000  | 1.378077000  | -2.867417000 |
| C  | 2.665119000  | 0.291067000  | -3.444630000 |
| C  | 1.271654000  | 0.359223000  | -3.453187000 |
| C  | 0.596657000  | 1.516106000  | -2.893097000 |
| C  | 1.342661000  | 2.564877000  | -2.347162000 |
| C  | 2.792666000  | 2.492943000  | -2.331291000 |
| C  | 4.579367000  | 0.798388000  | -2.179503000 |
| C  | 4.508544000  | -0.647209000 | -2.332328000 |
| C  | 3.329723000  | -0.960930000 | -3.118695000 |
| C  | 2.570614000  | -2.094444000 | -2.818931000 |
| C  | 0.478941000  | -0.820988000 | -3.145424000 |
| C  | -0.609555000 | 1.057059000  | -2.234413000 |
| C  | -1.032660000 | 1.654083000  | -1.059124000 |
| C  | -0.247938000 | 2.716450000  | -0.478685000 |
| C  | 0.909189000  | 3.180239000  | -1.112040000 |
| C  | 2.090928000  | 3.497225000  | -0.325096000 |
| C  | 3.256829000  | 3.069759000  | -1.080004000 |
| C  | 4.350888000  | 2.510282000  | -0.416962000 |
| C  | 5.025395000  | 1.351889000  | -0.977326000 |
| C  | 4.888129000  | -1.479131000 | -1.277058000 |
| C  | 5.348035000  | -0.901215000 | -0.025250000 |
| C  | 5.417308000  | 0.485181000  | 0.121391000  |
| C  | 4.981608000  | 1.106906000  | 1.360974000  |
| C  | 4.323641000  | 2.358811000  | 1.028895000  |
| C  | 3.203632000  | 2.772068000  | 1.753269000  |
| C  | 2.064870000  | 3.351658000  | 1.061183000  |
| C  | 0.856146000  | 2.883247000  | 1.721436000  |
| C  | -0.275379000 | 2.565077000  | 0.964079000  |
| C  | -0.688685000 | -0.400594000 | -2.403506000 |
| C  | -0.773081000 | -0.880419000 | 2.181629000  |
| C  | -1.203935000 | -1.415631000 | 0.975474000  |
| C  | -0.521719000 | -2.562621000 | 0.419318000  |
| C  | 0.567175000  | -3.136731000 | 1.086479000  |
| C  | 1.023801000  | -2.570821000 | 2.336353000  |
| C  | 1.143570000  | -0.363542000 | 3.438552000  |
| C  | 0.485004000  | 0.887271000  | 3.106378000  |
| C  | -0.693873000 | 0.579070000  | 2.321676000  |
| C  | -1.080087000 | 1.409396000  | 1.282779000  |
| C  | -1.713570000 | 0.883244000  | 0.030832000  |
| C  | -1.749495000 | -0.585072000 | -0.124897000 |
| C  | -0.495756000 | -2.412437000 | -1.022629000 |
| C  | 0.619965000  | -2.839543000 | -1.753374000 |
| C  | 1.756122000  | -3.422798000 | -1.058761000 |
| C  | 1.730479000  | -3.568341000 | 0.328899000  |
| C  | 2.912751000  | -3.258033000 | 1.115455000  |
| C  | 2.474223000  | -2.636884000 | 2.355261000  |
| C  | 3.217369000  | -1.593569000 | 2.911931000  |
| C  | 2.536608000  | -0.434060000 | 3.465710000  |
| C  | 1.246646000  | 2.023180000  | 2.817055000  |
| C  | 2.696852000  | 1.950410000  | 2.840251000  |
| C  | 3.329090000  | 0.745673000  | 3.155536000  |
| C  | 4.493980000  | 0.317204000  | 2.404306000  |
| C  | 4.423630000  | -1.128677000 | 2.251868000  |
| C  | 4.844808000  | -1.724933000 | 1.061561000  |
| C  | 4.072958000  | -2.810387000 | 0.481937000  |
| C  | 4.099717000  | -2.658313000 | -0.964221000 |
| C  | 2.965478000  | -2.960633000 | -1.719386000 |
| C  | -1.165712000 | -1.174613000 | -1.354773000 |
| C  | 1.119911000  | -2.028160000 | -2.840514000 |
| C  | 0.367723000  | -1.450987000 | 2.862091000  |

$$E_g(\text{B3LYP}/6\text{-}31\text{G}(\text{d})) = -2940.39991$$

$$G_g(\text{B3LYP}/6\text{-}31\text{G}(\text{d})) = -2939.81245$$

$$E_s(\text{M06}/6\text{-}311\text{G}(\text{d},\text{p})//\text{B3LYP}/6\text{-}31\text{G}(\text{d})) = -2938.94794$$

$$G_s(\text{M06}/6\text{-}311\text{G}(\text{d},\text{p})//\text{B3LYP}/6\text{-}31\text{G}(\text{d})) = -2938.36048$$

In [6,6] bond

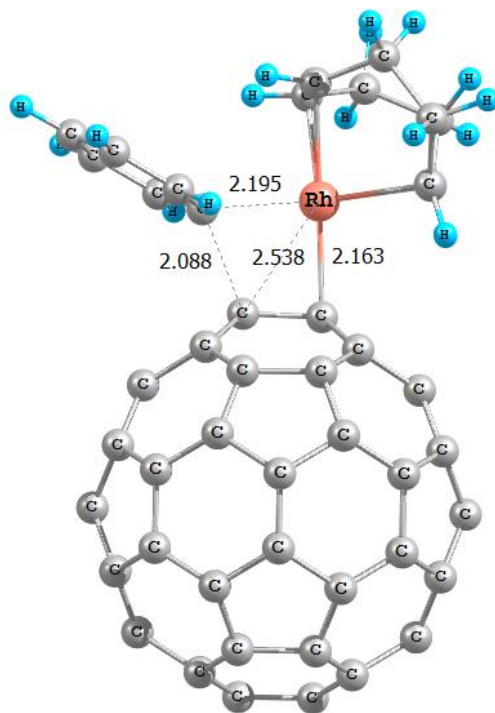

# F

|    |              |              |              |
|----|--------------|--------------|--------------|
| C  | 5.950018000  | -0.519418000 | -1.207449000 |
| C  | 4.238520000  | -2.396489000 | 0.087340000  |
| C  | 4.350735000  | -1.760941000 | 1.346215000  |
| C  | 6.255424000  | -0.066438000 | 0.073735000  |
| C  | 5.635833000  | -1.477682000 | 2.099338000  |
| C  | 6.775284000  | -0.945944000 | 1.201042000  |
| C  | 6.015871000  | -1.954581000 | -1.697432000 |
| C  | 5.415161000  | -2.971666000 | -0.700713000 |
| H  | 3.276568000  | -2.851115000 | -0.138127000 |
| H  | 3.471380000  | -1.785911000 | 1.986738000  |
| H  | 5.922252000  | 0.225482000  | -2.002540000 |
| H  | 6.406376000  | 1.003133000  | 0.199098000  |
| H  | 7.052214000  | -2.230582000 | -1.948882000 |
| H  | 5.072966000  | -3.852117000 | -1.255739000 |
| H  | 5.964198000  | -2.380468000 | 2.639299000  |
| H  | 7.473084000  | -0.365337000 | 1.815163000  |
| H  | 6.185155000  | -3.333133000 | -0.010508000 |
| H  | 5.451075000  | -2.004893000 | -2.635585000 |
| H  | 5.406947000  | -0.730074000 | 2.868161000  |
| H  | 7.356814000  | -1.776954000 | 0.789172000  |
| H  | 4.022544000  | -0.264201000 | -0.148597000 |
| Rh | 3.074695000  | 2.041774000  | 0.035550000  |
| C  | 3.646573000  | 2.666378000  | 1.165579000  |
| C  | 3.779073000  | 2.102893000  | -1.187361000 |
| C  | 4.834177000  | 3.382151000  | 1.058362000  |
| H  | 3.119275000  | 2.626236000  | 2.113528000  |
| C  | 4.974351000  | 2.839339000  | -1.289819000 |
| H  | 3.319749000  | 1.707389000  | -2.090178000 |
| C  | 5.495968000  | 3.484846000  | -0.175501000 |
| H  | 5.238122000  | 3.883888000  | 1.933520000  |
| H  | 5.474004000  | 2.913904000  | -2.251923000 |
| H  | 6.406460000  | 4.071727000  | -0.258423000 |
| C  | -3.603231000 | 0.872722000  | 2.998782000  |
| C  | -2.687411000 | -0.161943000 | 3.455290000  |
| C  | -1.313453000 | 0.080852000  | 3.463462000  |
| C  | -0.798154000 | 1.365733000  | 3.031014000  |
| C  | -1.680632000 | 2.365267000  | 2.606559000  |
| C  | -3.109458000 | 2.112495000  | 2.585999000  |
| C  | -4.608442000 | 0.229328000  | 2.255204000  |
| C  | -4.413892000 | -1.204199000 | 2.254608000  |
| C  | -3.195869000 | -1.447292000 | 3.003389000  |
| C  | -2.304186000 | -2.438384000 | 2.585879000  |
| C  | -0.381918000 | -0.950007000 | 3.032543000  |
| C  | 0.448621000  | 1.140459000  | 2.330309000  |
| C  | 0.788310000  | 1.915245000  | 1.240309000  |
| C  | -0.145975000 | 2.905876000  | 0.771678000  |
| C  | -1.346021000 | 3.156425000  | 1.447853000  |
| C  | -2.568801000 | 3.402667000  | 0.697190000  |
| C  | -3.660482000 | 2.753858000  | 1.402530000  |
| C  | -4.684141000 | 2.132315000  | 0.683715000  |
| C  | -5.197965000 | 0.844902000  | 1.118012000  |
| C  | -4.701896000 | -1.962977000 | 1.117844000  |
| C  | -5.245786000 | -1.319383000 | -0.066236000 |
| C  | -5.491997000 | 0.055242000  | -0.065988000 |
| C  | -5.154637000 | 0.853128000  | -1.232846000 |
| C  | -4.657625000 | 2.137448000  | -0.770544000 |
| C  | -3.608675000 | 2.764389000  | -1.446556000 |
| C  | -2.544032000 | 3.408219000  | -0.696134000 |
| C  | -1.294870000 | 3.165651000  | -1.401427000 |
| C  | -0.122659000 | 2.908863000  | -0.679982000 |
| C  | 0.716200000  | -0.314282000 | 2.345171000  |
| C  | 0.804355000  | -0.299136000 | -2.248034000 |
| C  | 1.323989000  | -0.899462000 | -1.106621000 |
| C  | 0.774119000  | -2.170494000 | -0.680763000 |
| C  | -0.239316000 | -2.807724000 | -1.405654000 |
| C  | -0.775995000 | -2.177662000 | -2.588275000 |
| C  | -1.185092000 | 0.103683000  | -3.437652000 |
| C  | -0.688499000 | 1.385323000  | -2.976775000 |
| C  | 0.528686000  | 1.152924000  | -2.229925000 |
| C  | 0.817131000  | 1.915057000  | -1.118289000 |
| C  | 1.662631000  | 1.410256000  | 0.072435000  |
| C  | 1.861143000  | -0.157315000 | 0.073215000  |
| C  | 0.743566000  | -2.173522000 | 0.765163000  |
| C  | -0.294662000 | -2.818121000 | 1.449300000  |
| C  | -1.356181000 | -3.466564000 | 0.697060000  |
| C  | -1.329378000 | -3.460343000 | -0.697718000 |
| C  | -2.549941000 | -3.219061000 | -1.447905000 |
| C  | -2.205868000 | -2.419653000 | -2.614168000 |
| C  | -3.083000000 | -1.426338000 | -3.058124000 |
| C  | -2.558629000 | -0.138359000 | -3.482110000 |
| C  | -1.585192000 | 2.382998000  | -2.577919000 |
| C  | -3.013378000 | 2.130362000  | -2.612163000 |
| C  | -3.490890000 | 0.893561000  | -3.052804000 |
| C  | -4.582871000 | 0.245232000  | -2.353695000 |
| C  | -4.328173000 | -1.188546000 | -2.353550000 |
| C  | -4.658170000 | -1.955024000 | -1.233472000 |
| C  | -3.749155000 | -2.989392000 | -0.771613000 |
| C  | -3.776796000 | -2.994779000 | 0.683077000  |
| C  | -2.604298000 | -3.230482000 | 1.402655000  |
| C  | 1.267839000  | -0.904487000 | 1.217296000  |
| C  | -0.874205000 | -2.195118000 | 2.613465000  |
| C  | -0.268231000 | -0.930002000 | -2.980202000 |

$$E_g(\text{B3LYP}/6\text{-}31\text{G}(\text{d})) = -2940.43664$$

$$G_g(\text{B3LYP}/6\text{-}31\text{G}(\text{d})) = -2939.84708$$

$$E_s(\text{M06}/6\text{-}311\text{G}(\text{d},\text{p})//\text{B3LYP}/6\text{-}31\text{G}(\text{d})) = -2938.98851$$

$$G_s(\text{M06}/6\text{-}311\text{G}(\text{d},\text{p})//\text{B3LYP}/6\text{-}31\text{G}(\text{d})) = -2938.39895$$

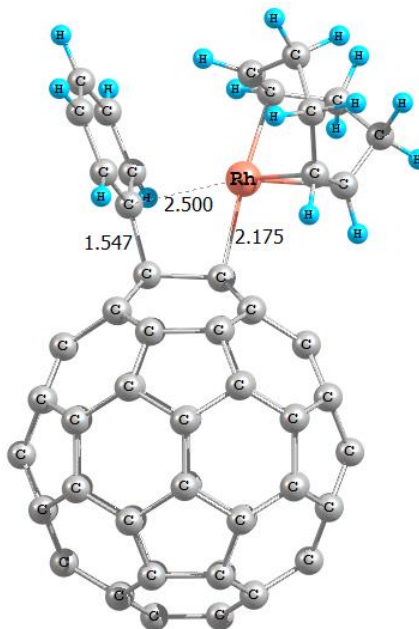

# G

|    |              |              |              |
|----|--------------|--------------|--------------|
| C  | -6.125054000 | -0.264333000 | -0.546865000 |
| C  | -4.561100000 | -1.313800000 | 1.565468000  |
| C  | -4.048228000 | -2.354257000 | 0.759364000  |
| C  | -5.803262000 | -1.428973000 | -1.252590000 |
| C  | -4.848999000 | -3.407232000 | 0.014939000  |
| C  | -6.071577000 | -2.833343000 | -0.733245000 |
| C  | -6.764267000 | -0.216532000 | 0.829870000  |
| C  | -6.049110000 | -1.118915000 | 1.864707000  |
| H  | -3.881769000 | -0.914758000 | 2.317484000  |
| H  | -3.026624000 | -2.664542000 | 0.962358000  |
| H  | -6.221888000 | 0.655554000  | -1.126432000 |
| H  | -5.627637000 | -1.333860000 | -2.322375000 |
| H  | -7.832165000 | -0.478050000 | 0.769359000  |
| H  | -6.156888000 | -0.675064000 | 2.860718000  |
| H  | -5.158684000 | -4.207105000 | 0.706631000  |
| H  | -6.323395000 | -3.489664000 | -1.573715000 |
| H  | -6.538314000 | -2.098398000 | 1.920802000  |
| H  | -6.721175000 | 0.821936000  | 1.172596000  |
| H  | -4.172762000 | -3.875594000 | -0.710050000 |
| H  | -6.951078000 | -2.825245000 | -0.080209000 |
| Rh | -3.984149000 | -0.534679000 | -0.346511000 |
| C  | -2.873916000 | 2.371599000  | 0.155729000  |
| C  | -3.236117000 | 3.297947000  | -0.835342000 |
| C  | -3.699061000 | 2.256791000  | 1.286700000  |
| C  | -4.402184000 | 4.065264000  | -0.714981000 |
| H  | -2.582004000 | 3.453447000  | -1.689948000 |
| C  | -4.847599000 | 3.037224000  | 1.418355000  |
| H  | -3.419713000 | 1.572313000  | 2.081389000  |
| C  | -5.211836000 | 3.938045000  | 0.412471000  |
| H  | -4.659458000 | 4.775229000  | -1.496632000 |
| H  | -5.456911000 | 2.947027000  | 2.313928000  |
| H  | -6.107160000 | 4.544379000  | 0.516948000  |
| C  | 3.545714000  | 0.691776000  | -3.086389000 |
| C  | 2.571983000  | -0.322726000 | -3.461711000 |
| C  | 1.206685000  | -0.028614000 | -3.413031000 |
| C  | 0.764939000  | 1.286010000  | -2.997910000 |
| C  | 1.701174000  | 2.266954000  | -2.653309000 |
| C  | 3.118807000  | 1.962243000  | -2.693594000 |
| C  | 4.623974000  | 0.034843000  | -2.373587000 |
| C  | 4.317281000  | -1.387057000 | -2.310325000 |
| C  | 3.055709000  | -1.608393000 | -2.992396000 |
| C  | 2.146719000  | -2.547725000 | -2.495997000 |
| C  | 0.256648000  | -1.007194000 | -2.906991000 |
| C  | -0.451340000 | 1.130856000  | -2.227892000 |
| C  | -0.707724000 | 1.951450000  | -1.148544000 |
| C  | 0.283911000  | 2.920880000  | -0.764435000 |
| C  | 1.453818000  | 3.107810000  | -1.508871000 |
| C  | 2.720168000  | 3.335561000  | -0.828644000 |
| C  | 3.751584000  | 2.623950000  | -1.563104000 |
| C  | 4.786162000  | 1.988505000  | -0.872770000 |
| C  | 5.230469000  | 0.668367000  | -1.285701000 |
| C  | 4.632695000  | -2.116285000 | -1.162009000 |
| C  | 5.256852000  | -1.454290000 | -0.029071000 |
| C  | 5.535813000  | -0.090841000 | -0.089604000 |
| C  | 5.303371000  | 0.757617000  | 1.062866000  |
| C  | 4.830767000  | 2.043431000  | 0.579849000  |
| C  | 3.839269000  | 2.731427000  | 1.282859000  |
| C  | 2.763663000  | 3.389677000  | 0.563010000  |
| C  | 1.542324000  | 3.218331000  | 1.336924000  |
| C  | 0.327253000  | 2.981124000  | 0.684341000  |
| C  | -0.799571000 | -0.307745000 | -2.203847000 |
| C  | -0.638106000 | -0.130453000 | 2.400692000  |
| C  | -1.230311000 | -0.743236000 | 1.304605000  |
| C  | -0.742070000 | -2.047323000 | 0.905609000  |
| C  | 0.276429000  | -2.703625000 | 1.605293000  |
| C  | 0.892049000  | -2.054804000 | 2.735543000  |
| C  | 1.421594000  | 0.236165000  | 3.480547000  |
| C  | 0.948464000  | 1.519375000  | 3.001419000  |
| C  | -0.315086000 | 1.310804000  | 2.326501000  |
| C  | -0.629072000 | 2.041325000  | 1.202689000  |
| C  | -1.570043000 | 1.545455000  | 0.071666000  |
| C  | -1.813701000 | -0.031381000 | 0.129352000  |
| C  | -0.786730000 | -2.105711000 | -0.534419000 |
| C  | 0.188107000  | -2.807121000 | -1.244983000 |
| C  | 1.259871000  | -3.474291000 | -0.524699000 |
| C  | 1.303584000  | -3.420695000 | 0.860920000  |
| C  | 2.567978000  | -3.202846000 | 1.550359000  |
| C  | 2.311923000  | -2.351941000 | 2.702968000  |
| C  | 3.243353000  | -1.377259000 | 3.067042000  |
| C  | 2.786774000  | -0.056919000 | 3.468760000  |
| C  | 1.861988000  | 2.468017000  | 2.526316000  |
| C  | 3.279775000  | 2.161243000  | 2.498920000  |
| C  | 3.733985000  | 0.923060000  | 2.959138000  |
| C  | 4.766596000  | 0.210371000  | 2.231493000  |
| C  | 4.460355000  | -1.210791000 | 2.294109000  |
| C  | 4.705993000  | -2.026866000 | 1.187296000  |
| C  | 3.737812000  | -3.041376000 | 0.807134000  |
| C  | 3.691969000  | -3.096160000 | -0.646472000 |
| C  | 2.477016000  | -3.309041000 | -1.299064000 |
| C  | -1.301239000 | -0.833047000 | -1.005133000 |
| C  | 0.728247000  | -2.252695000 | -2.467068000 |
| C  | 0.447905000  | -0.776604000 | 3.103054000  |
| O  | -3.769971000 | 0.546549000  | -2.310134000 |
| H  | -2.885691000 | 0.309984000  | -2.663279000 |
| H  | -3.731489000 | 1.504248000  | -2.118395000 |

$E_g(\text{B3LYP}/6\text{-}31\text{G}(\text{d})) = -3016.86342$

$G_g(\text{B3LYP}/6\text{-}31\text{G}(\text{d})) = -3016.25018$

$E_s(\text{M06}/6\text{-}311\text{G}(\text{d},\text{p})//\text{B3LYP}/6\text{-}31\text{G}(\text{d})) = -3015.42067$

$G_s(\text{M06}/6\text{-}311\text{G}(\text{d},\text{p})//\text{B3LYP}/6\text{-}31\text{G}(\text{d})) = -3014.80743$

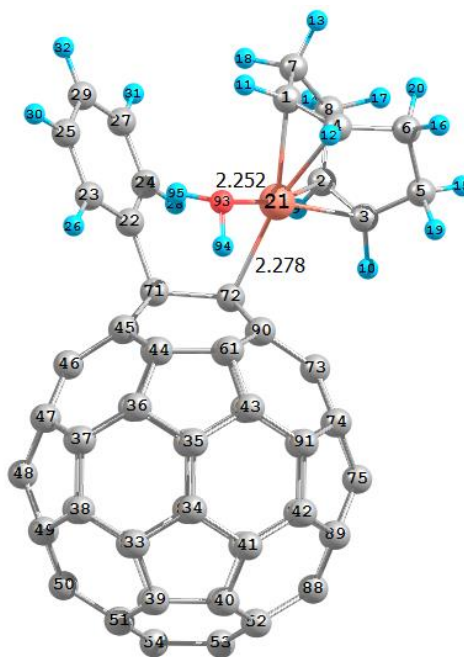

# G-H

|    |              |              |              |
|----|--------------|--------------|--------------|
| C  | -5.988328000 | -0.231734000 | 0.129185000  |
| C  | -4.296210000 | -2.169127000 | 1.299474000  |
| C  | -4.104217000 | -2.861363000 | 0.091686000  |
| C  | -6.012831000 | -1.080185000 | -0.993875000 |
| C  | -5.191897000 | -3.475650000 | -0.771369000 |
| C  | -6.413958000 | -2.550009000 | -0.965491000 |
| C  | -6.312032000 | -0.632831000 | 1.555601000  |
| C  | -5.649444000 | -1.963895000 | 1.975412000  |
| H  | -3.436627000 | -2.091763000 | 1.961383000  |
| H  | -3.116551000 | -3.285492000 | -0.081204000 |
| H  | -6.028661000 | 0.839162000  | -0.064878000 |
| H  | -6.089162000 | -0.598049000 | -1.967935000 |
| H  | -7.402762000 | -0.679036000 | 1.701547000  |
| H  | -5.509703000 | -1.967999000 | 3.061880000  |
| H  | -5.505032000 | -4.447222000 | -0.357801000 |
| H  | -6.912330000 | -2.804199000 | -1.907429000 |
| H  | -6.308057000 | -2.810537000 | 1.754003000  |
| H  | -5.949814000 | 0.168564000  | 2.209498000  |
| H  | -4.749495000 | -3.689943000 | -1.751347000 |
| H  | -7.155435000 | -2.718068000 | -0.177221000 |
| Rh | -3.962571000 | -0.756163000 | -0.329220000 |
| C  | -2.381805000 | 3.224127000  | 0.127540000  |
| C  | -2.529761000 | 4.186319000  | -0.882065000 |
| C  | -3.290353000 | 3.226634000  | 1.190800000  |
| C  | -3.564909000 | 5.118112000  | -0.834727000 |
| H  | -1.827367000 | 4.207312000  | -1.711384000 |
| C  | -4.328928000 | 4.161100000  | 1.241406000  |
| H  | -3.190019000 | 2.493934000  | 1.986051000  |
| C  | -4.471263000 | 5.109385000  | 0.229340000  |
| H  | -3.660425000 | 5.856504000  | -1.626692000 |
| H  | -5.022748000 | 4.147355000  | 2.078320000  |
| H  | -5.275627000 | 5.839003000  | 0.269655000  |
| C  | -4.809779000 | 1.893866000  | -0.511500000 |
| C  | 4.202909000  | 1.878864000  | -1.833815000 |
| C  | 2.994031000  | 2.542959000  | -2.051770000 |
| C  | 2.350133000  | 3.256374000  | -0.966501000 |
| C  | 2.944132000  | 3.286849000  | 0.301070000  |
| C  | 4.192154000  | 2.584722000  | 0.533193000  |
| C  | 5.394711000  | 0.587627000  | -0.273554000 |
| C  | 5.152664000  | -0.232844000 | -1.450401000 |
| C  | 4.425079000  | 0.567458000  | -2.418966000 |
| C  | 3.432227000  | -0.018668000 | -3.206892000 |
| C  | 1.958621000  | 1.935745000  | -2.873401000 |
| C  | 0.919096000  | 3.096949000  | -1.105280000 |
| C  | 0.123554000  | 2.965988000  | 0.013154000  |
| C  | 0.736596000  | 2.944754000  | 1.311572000  |
| C  | 2.115262000  | 3.126899000  | 1.470304000  |
| C  | 2.846578000  | 2.327898000  | 2.442437000  |
| C  | 4.133267000  | 1.990704000  | 1.861000000  |
| C  | 4.694397000  | 0.732235000  | 2.089149000  |
| C  | 5.337513000  | 0.016516000  | 1.000611000  |
| C  | 4.865204000  | -1.591929000 | -1.305495000 |
| C  | 4.798038000  | -2.182224000 | 0.020247000  |
| C  | 5.032838000  | -1.395862000 | 1.150715000  |
| C  | 4.197973000  | -1.553357000 | 2.329339000  |
| C  | 3.989409000  | -0.238369000 | 2.910064000  |
| C  | 2.752119000  | 0.089204000  | 3.469999000  |
| C  | 2.170147000  | 1.397378000  | 3.229615000  |
| C  | 0.732737000  | 1.223630000  | 3.079261000  |
| C  | 0.031763000  | 1.974599000  | 2.129413000  |
| C  | 0.670667000  | 2.279920000  | -2.312437000 |
| C  | -1.648922000 | -0.802188000 | 0.299598000  |
| C  | -1.435689000 | -0.195888000 | -0.959143000 |
| C  | -0.798656000 | -0.925471000 | -2.043208000 |
| C  | -0.258614000 | -2.190211000 | -1.822568000 |
| C  | -0.335890000 | -2.787606000 | -0.497309000 |
| C  | -0.352973000 | -2.063839000 | 1.846329000  |
| C  | -0.563735000 | -0.749356000 | 2.423532000  |
| C  | -1.307764000 | 0.055708000  | 1.480303000  |
| C  | -1.029134000 | 1.400208000  | 1.344536000  |
| C  | -1.225307000 | 2.207235000  | 0.040493000  |
| C  | -1.368672000 | 1.245645000  | -1.205325000 |
| C  | -0.112252000 | 0.039726000  | -2.865018000 |
| C  | 1.118632000  | -0.292092000 | -3.446079000 |
| C  | 1.696236000  | -1.601829000 | -3.200691000 |
| C  | 1.019014000  | -2.537111000 | -2.412636000 |
| C  | 1.747169000  | -3.335884000 | -1.440933000 |
| C  | 0.908515000  | -3.487765000 | -0.260357000 |
| C  | 1.487031000  | -3.480824000 | 1.012196000  |
| C  | 0.841297000  | -2.754746000 | 2.086794000  |
| C  | 0.428663000  | -0.176370000 | 3.228633000  |
| C  | 1.672586000  | -0.885765000 | 3.468088000  |
| C  | 1.876350000  | -2.148954000 | 2.909353000  |
| C  | 3.162930000  | -2.491707000 | 2.333814000  |
| C  | 2.921490000  | -3.312692000 | 1.156573000  |
| C  | 3.724529000  | -3.160550000 | 0.024596000  |
| C  | 3.124881000  | -3.173103000 | -1.299698000 |
| C  | 3.831122000  | -2.202236000 | -2.122658000 |
| C  | 3.132595000  | -1.434719000 | -3.055980000 |
| C  | -0.354036000 | 1.346828000  | -2.290338000 |
| C  | 2.185258000  | 0.680987000  | -3.456458000 |
| C  | -0.961691000 | -2.085473000 | 0.534651000  |
| O  | -3.898639000 | 0.992507000  | -1.500528000 |
| H  | -2.700180000 | 1.311229000  | -1.562700000 |
| H  | -4.212743000 | 0.824181000  | -2.405471000 |

$$E_g(\text{B3LYP}/6\text{-}31\text{G}(\text{d})) = -3016.84619$$

$$G_g(\text{B3LYP}/6\text{-}31\text{G}(\text{d})) = -3016.23888$$

$$E_s(\text{M06}/6\text{-}311\text{G}(\text{d,p})//\text{B3LYP}/6\text{-}31\text{G}(\text{d})) = -3015.39418$$

$$G_s(\text{M06}/6\text{-}311\text{G}(\text{d,p})//\text{B3LYP}/6\text{-}31\text{G}(\text{d})) = -3014.78687$$

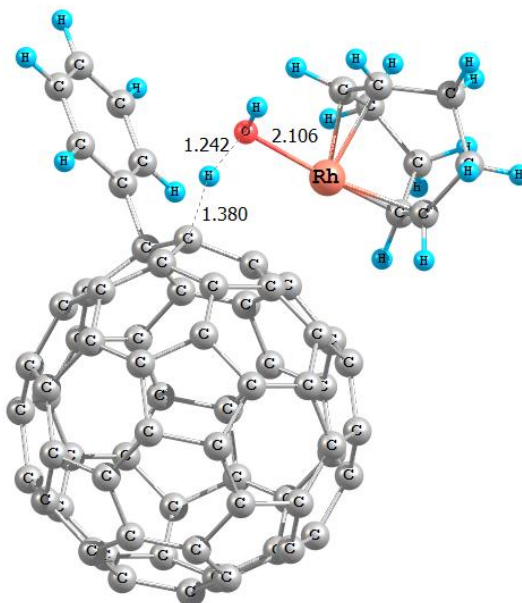

# I

|   |              |              |               |
|---|--------------|--------------|---------------|
| C | 2.770819000  | -0.000424000 | -1.635905000  |
| C | 1.903158000  | 1.177019000  | -2.091638000  |
| C | 3.182195000  | -0.000012000 | -0.080081000  |
| C | 1.903165000  | -1.178113000 | -2.091016000  |
| C | 1.640243000  | 2.283860000  | -1.316086000  |
| C | 0.914506000  | 0.725151000  | -3.033410000  |
| C | 2.565487000  | 1.175322000  | 0.706336000   |
| C | 2.565499000  | -1.174938000 | 0.706958000   |
| C | 0.914509000  | -0.726746000 | -3.033026000  |
| C | 1.640255000  | -2.284545000 | -1.314879000  |
| C | 1.978232000  | 2.278588000  | 0.126523000   |
| C | 0.396210000  | 3.004832000  | -1.471050000  |
| C | -0.284146000 | 1.425005000  | -3.218882000  |
| C | 2.097286000  | 0.725983000  | 1.989794000   |
| C | 2.097289000  | -0.724922000 | 1.990176000   |
| C | 1.978246000  | -2.278512000 | 0.127727000   |
| C | -0.284140000 | -1.426703000 | -3.218124000  |
| C | 0.396225000  | -3.005604000 | -1.469460000  |
| C | 0.933646000  | 3.001429000  | 0.819399000   |
| C | -0.040559000 | 3.448785000  | -0.159365000  |
| C | -0.550525000 | 2.593793000  | -2.416855000  |
| C | -1.531152000 | 0.696211000  | -3.391638000  |
| C | 1.105576000  | 1.424896000  | 2.687730000   |
| C | 1.105581000  | -1.423470000 | 2.688481000   |
| C | 0.933662000  | -3.000930000 | 0.820986000   |
| C | -0.550513000 | -2.595065000 | -2.415481000  |
| C | -1.531148000 | -0.698006000 | -3.391267000  |
| C | -0.040542000 | -3.448869000 | -0.157541000  |
| C | 0.508725000  | 2.593148000  | 2.088096000   |
| C | -1.398296000 | 3.469144000  | 0.160326000   |
| C | -1.962680000 | 2.598413000  | -2.080717000  |
| C | -2.571388000 | 1.424246000  | -2.685149000  |
| C | 0.066600000  | 0.697800000  | 3.400114000   |
| C | 0.508739000  | -2.592045000 | 2.089470000   |
| C | 0.066604000  | -0.696003000 | 3.400485000   |
| C | -1.962596000 | -2.599514000 | -2.079341000  |
| C | -2.571384000 | -1.425673000 | -2.684398000  |
| C | -1.398279000 | -3.469059000 | 0.162159000   |
| C | -0.904361000 | 2.599746000  | 2.418704000   |
| C | -1.840140000 | 3.027990000  | 1.474111000   |
| C | -2.379457000 | 3.027294000  | -0.818446000  |
| C | -3.570888000 | 0.726802000  | -2.003437000  |
| C | -1.179494000 | 1.425692000  | 3.231479000   |
| C | -0.904349000 | -2.598474000 | 2.420081000   |
| C | -1.179487000 | -1.423989000 | 3.232236000   |
| C | -2.379443000 | -3.027730000 | -0.816845000  |
| C | -3.570887000 | -0.727873000 | -2.003055000  |
| C | -1.840125000 | -3.027214000 | 1.475710000   |
| C | -3.085369000 | 2.304627000  | 1.305451000   |
| C | -3.418817000 | 2.304345000  | -0.111891000  |
| C | -4.002973000 | 1.175423000  | -0.691346000  |
| C | -2.377764000 | 0.728096000  | 3.066899000   |
| C | -2.377759000 | -0.726485000 | 3.067283000   |
| C | -3.418806000 | -2.304415000 | -0.1110675000 |
| C | -4.002970000 | -1.175802000 | -0.690725000  |
| C | -3.085356000 | -2.303946000 | 1.305667000   |
| C | -3.349984000 | 1.176329000  | 2.085274000   |
| C | -4.271133000 | 0.000024000  | 0.120184000   |
| C | -3.349977000 | -1.175238000 | 2.085893000   |
| C | -3.951330000 | 0.000383000  | 1.479078000   |
| C | 4.722229000  | 0.000012000  | 0.014591000   |
| C | 5.437318000  | 1.205181000  | 0.029007000   |
| C | 5.437319000  | -1.205156000 | 0.029249000   |
| C | 6.832859000  | 1.205191000  | 0.058222000   |
| H | 4.902009000  | 2.150003000  | 0.025259000   |
| C | 6.832860000  | -1.205158000 | 0.058461000   |
| H | 4.902010000  | -2.149978000 | 0.025697000   |
| C | 7.536536000  | 0.000019000  | 0.074164000   |
| H | 7.368476000  | 2.150671000  | 0.073230000   |
| H | 7.368478000  | -2.150634000 | 0.073658000   |
| H | 8.622694000  | 0.000022000  | 0.101277000   |
| H | 3.715755000  | -0.000565000 | -2.193765000  |

$$E_g(\text{B3LYP}/6\text{-}31\text{G}(\text{d})) = -2518.37760$$

$$G_g(\text{B3LYP}/6\text{-}31\text{G}(\text{d})) = -2517.94917$$

$$E_s(\text{M06}/6\text{-}311\text{G}(\text{d},\text{p})//\text{B3LYP}/6\text{-}31\text{G}(\text{d})) = -2517.11109$$

$$G_s(\text{M06}/6\text{-}311\text{G}(\text{d},\text{p})//\text{B3LYP}/6\text{-}31\text{G}(\text{d})) = -2516.68266$$

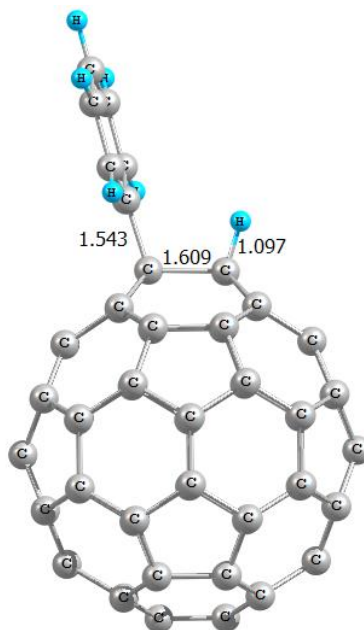



# H = L

|    |              |              |              |
|----|--------------|--------------|--------------|
| C  | -0.900729000 | -1.176670000 | 0.970867000  |
| C  | -0.147501000 | -0.092466000 | -1.505505000 |
| C  | 0.003235000  | 1.230485000  | -0.973159000 |
| C  | -0.983154000 | 0.155288000  | 1.420812000  |
| C  | -1.087485000 | 2.038151000  | -0.291214000 |
| C  | -1.862965000 | 1.220657000  | 0.768928000  |
| C  | -1.626741000 | -1.746732000 | -0.240027000 |
| C  | -1.467538000 | -0.866881000 | -1.503266000 |
| H  | 0.548691000  | -0.377078000 | -2.295589000 |
| H  | 0.794953000  | 1.842043000  | -1.409709000 |
| H  | -0.583694000 | -1.926574000 | 1.700682000  |
| H  | -0.704283000 | 0.346335000  | 2.458567000  |
| H  | -2.693045000 | -1.913218000 | -0.021015000 |
| H  | -1.512822000 | -1.501865000 | -2.394878000 |
| H  | -1.777580000 | 2.463470000  | -1.037748000 |
| H  | -2.246099000 | 1.898758000  | 1.539733000  |
| H  | -2.303454000 | -0.163253000 | -1.591522000 |
| H  | -1.198241000 | -2.735324000 | -0.442034000 |
| H  | -0.601404000 | 2.891485000  | 0.196065000  |
| H  | -2.745105000 | 0.750306000  | 0.319983000  |
| Rh | 0.865211000  | -0.150990000 | 0.320255000  |
| O  | 2.703394000  | 0.039815000  | -0.268094000 |
| H  | 2.897708000  | 0.329968000  | -1.173894000 |

$E_g(\text{B3LYP}/6\text{-}31\text{G}(\text{d})) = -498.46891$

$G_g(\text{B3LYP}/6\text{-}31\text{G}(\text{d})) = -498.30781$

$E_s(\text{M06}/6\text{-}311\text{G}(\text{d},\text{p})//\text{B3LYP}/6\text{-}31\text{G}(\text{d})) = -498.26624$

$G_s(\text{M06}/6\text{-}311\text{G}(\text{d},\text{p})//\text{B3LYP}/6\text{-}31\text{G}(\text{d})) = -498.10514$

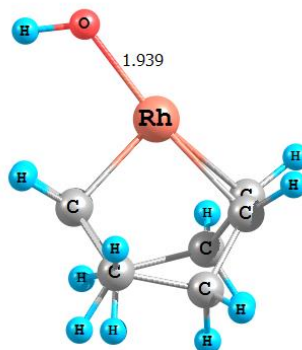

**J**

|    |              |              |              |
|----|--------------|--------------|--------------|
| C  | -0.289648000 | -1.264723000 | 0.864820000  |
| C  | -1.782581000 | -0.145905000 | -1.249045000 |
| C  | -1.693479000 | 1.161176000  | -0.762908000 |
| C  | -0.419392000 | 0.016966000  | 1.485690000  |
| C  | -2.166971000 | 1.650707000  | 0.594255000  |
| C  | -1.750949000 | 0.715641000  | 1.753770000  |
| C  | -1.419423000 | -2.113243000 | 0.318896000  |
| C  | -2.441773000 | -1.303315000 | -0.510305000 |
| H  | -1.637005000 | -0.285793000 | -2.322000000 |
| H  | -1.508248000 | 1.949099000  | -1.498366000 |
| H  | 0.612056000  | -1.828320000 | 1.106876000  |
| H  | 0.403805000  | 0.323460000  | 2.130541000  |
| H  | -1.918741000 | -2.641178000 | 1.145297000  |
| H  | -2.918464000 | -1.964609000 | -1.239949000 |
| H  | -3.256858000 | 1.793704000  | 0.584985000  |
| H  | -1.663988000 | 1.303082000  | 2.672457000  |
| H  | -3.245429000 | -0.922421000 | 0.126382000  |
| H  | -0.972820000 | -2.890697000 | -0.310360000 |
| H  | -1.730496000 | 2.641429000  | 0.757990000  |
| H  | -2.522490000 | -0.037144000 | 1.944825000  |
| Rh | 0.250660000  | 0.238836000  | -0.511240000 |
| N  | 2.257250000  | 0.057073000  | -0.076435000 |
| C  | 3.400979000  | -0.007246000 | 0.094297000  |
| C  | 4.839606000  | -0.087315000 | 0.305079000  |
| H  | 5.169322000  | -1.127924000 | 0.220117000  |
| H  | 5.359037000  | 0.515131000  | -0.447196000 |
| H  | 5.091652000  | 0.288600000  | 1.301940000  |

 $E_g(\text{B3LYP}/6\text{-}31\text{G}(\text{d})) = -555.21315$  $G_g(\text{B3LYP}/6\text{-}31\text{G}(\text{d})) = -555.02061$  $E_s(\text{M06}/6\text{-}311\text{G}(\text{d},\text{p})//\text{B3LYP}/6\text{-}31\text{G}(\text{d})) = -555.00830$  $G_s(\text{M06}/6\text{-}311\text{G}(\text{d},\text{p})//\text{B3LYP}/6\text{-}31\text{G}(\text{d})) = -554.81576$ 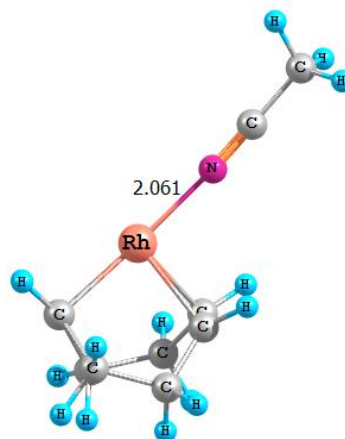

# K

|    |              |              |              |
|----|--------------|--------------|--------------|
| C  | 0.214749000  | 1.164138000  | 1.105605000  |
| C  | 0.342153000  | 0.200804000  | -1.505863000 |
| C  | 0.216816000  | -1.163603000 | -1.105470000 |
| C  | 0.342501000  | -0.200060000 | 1.505988000  |
| C  | 1.157648000  | -1.913449000 | -0.181756000 |
| C  | 1.496409000  | -1.111253000 | 1.096139000  |
| C  | 1.153159000  | 1.916070000  | 0.181220000  |
| C  | 1.494649000  | 1.113548000  | -1.095591000 |
| H  | -0.202300000 | 0.496612000  | -2.405746000 |
| H  | -0.403848000 | -1.800213000 | -1.743788000 |
| H  | -0.407228000 | 1.799333000  | 1.744041000  |
| H  | -0.201505000 | -0.496468000 | 2.405931000  |
| H  | 2.065801000  | 2.198369000  | 0.725539000  |
| H  | 1.708986000  | 1.807037000  | -1.913350000 |
| H  | 2.071361000  | -2.191670000 | -0.726360000 |
| H  | 1.710469000  | -1.805057000 | 1.913696000  |
| H  | 2.398648000  | 0.513560000  | -0.953826000 |
| H  | 0.661537000  | 2.853827000  | -0.096459000 |
| H  | 0.669413000  | -2.853275000 | 0.094745000  |
| H  | 2.399966000  | -0.510157000 | 0.956077000  |
| Rh | -1.132885000 | -0.001091000 | -0.000047000 |

$E_g(\text{B3LYP}/6\text{-}31\text{G}(\text{d})) = -422.39358$

$G_g(\text{B3LYP}/6\text{-}31\text{G}(\text{d})) = -422.24297$

$E_s(\text{M06}/6\text{-}311\text{G}(\text{d},\text{p})//\text{B3LYP}/6\text{-}31\text{G}(\text{d})) = -422.27187$

$G_s(\text{M06}/6\text{-}311\text{G}(\text{d},\text{p})//\text{B3LYP}/6\text{-}31\text{G}(\text{d})) = -422.12126$

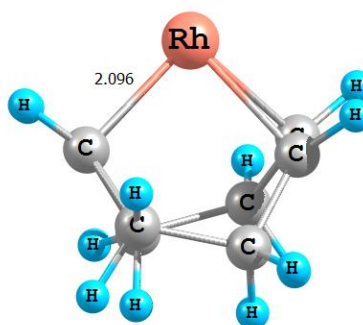

**M**

|    |              |              |              |
|----|--------------|--------------|--------------|
| C  | -1.343870000 | -1.449521000 | -0.749522000 |
| C  | -1.475193000 | 1.394576000  | -0.643312000 |
| C  | -1.343918000 | 1.449463000  | 0.749502000  |
| C  | -1.475250000 | -1.394632000 | 0.643279000  |
| C  | -2.235489000 | 0.766065000  | 1.767459000  |
| C  | -2.602795000 | -0.685107000 | 1.384903000  |
| C  | -2.235367000 | -0.766121000 | -1.767544000 |
| C  | -2.602688000 | 0.685058000  | -1.385023000 |
| H  | -0.943014000 | 2.152081000  | -1.216997000 |
| H  | -0.740839000 | 2.260912000  | 1.156635000  |
| H  | -0.740752000 | -2.260966000 | -1.156605000 |
| H  | -0.943105000 | -2.152125000 | 1.217010000  |
| H  | -3.145293000 | -1.363170000 | -1.929619000 |
| H  | -2.833196000 | 1.245921000  | -2.296254000 |
| H  | -3.145421000 | 1.363121000  | 1.929477000  |
| H  | -2.833383000 | -1.245971000 | 2.296113000  |
| H  | -3.512310000 | 0.707626000  | -0.777675000 |
| H  | -1.700898000 | -0.762277000 | -2.723898000 |
| H  | -1.701085000 | 0.762209000  | 2.723849000  |
| H  | -3.512369000 | -0.707662000 | 0.777481000  |
| Rh | 0.094767000  | -0.000023000 | 0.000040000  |
| N  | 1.565195000  | 1.471306000  | -0.040655000 |
| N  | 1.565263000  | -1.471289000 | 0.040801000  |
| C  | 2.379977000  | 2.292583000  | -0.071093000 |
| C  | 2.380144000  | -2.292467000 | 0.071199000  |
| C  | 3.406604000  | 3.326765000  | -0.110113000 |
| H  | 4.028769000  | 3.268456000  | 0.788696000  |
| H  | 4.040143000  | 3.189337000  | -0.992175000 |
| H  | 2.940588000  | 4.316007000  | -0.157147000 |
| C  | 3.406861000  | -3.326568000 | 0.109999000  |
| H  | 4.009742000  | -3.287537000 | -0.802896000 |
| H  | 4.059140000  | -3.171403000 | 0.975289000  |
| H  | 2.941476000  | -4.314189000 | 0.187508000  |

 $E_g(\text{B3LYP}/6\text{-}31\text{G}(\text{d})) = -688.01945$  $G_g(\text{B3LYP}/6\text{-}31\text{G}(\text{d})) = -687.78975$  $E_s(\text{M06}/6\text{-}311\text{G}(\text{d,p})//\text{B3LYP}/6\text{-}31\text{G}(\text{d})) = -687.74503$  $G_s(\text{M06}/6\text{-}311\text{G}(\text{d,p})//\text{B3LYP}/6\text{-}31\text{G}(\text{d})) = -687.51533$ 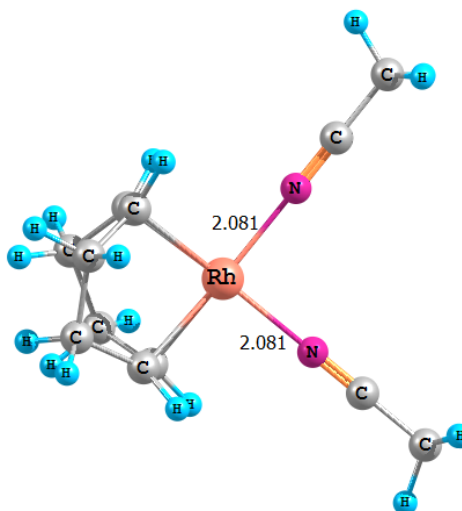

**NOTE:** The following energies in solution are calculated with water as the solvent.

**N**

|    |              |              |              |
|----|--------------|--------------|--------------|
| C  | 5.963555000  | -1.035978000 | -1.056910000 |
| C  | 5.119910000  | -0.191069000 | 1.525949000  |
| C  | 4.855717000  | 1.143128000  | 1.094794000  |
| C  | 5.953186000  | 0.318486000  | -1.389464000 |
| C  | 5.841453000  | 2.085315000  | 0.434432000  |
| C  | 6.712867000  | 1.405993000  | -0.646641000 |
| C  | 6.680239000  | -1.660816000 | 0.127307000  |
| C  | 6.482445000  | -0.877601000 | 1.446174000  |
| H  | 4.446431000  | -0.587521000 | 2.284641000  |
| H  | 4.023485000  | 1.650015000  | 1.583353000  |
| H  | 5.655089000  | -1.738175000 | -1.834851000 |
| H  | 5.589586000  | 0.582314000  | -2.383176000 |
| H  | 7.751252000  | -1.772982000 | -0.095488000 |
| H  | 6.576209000  | -1.570828000 | 2.287472000  |
| H  | 6.474310000  | 2.556971000  | 1.201594000  |
| H  | 7.044161000  | 2.160968000  | -1.366293000 |
| H  | 7.272451000  | -0.131455000 | 1.579189000  |
| H  | 6.287317000  | -2.675197000 | 0.251613000  |
| H  | 5.264111000  | 2.896506000  | -0.022535000 |
| H  | 7.620969000  | 0.984872000  | -0.205990000 |
| Rh | 4.058516000  | -0.221838000 | -0.311523000 |
| C  | -3.094087000 | 2.889696000  | 1.315183000  |
| C  | -2.394300000 | 2.377512000  | 2.482593000  |
| C  | -1.002431000 | 2.430446000  | 2.540777000  |
| C  | -0.253076000 | 2.998656000  | 1.434012000  |
| C  | -0.924787000 | 3.489319000  | 0.311834000  |
| C  | -2.375313000 | 3.437941000  | 0.252372000  |
| C  | -4.228478000 | 2.020750000  | 1.054855000  |
| C  | -4.229723000 | 0.970557000  | 2.060170000  |
| C  | -3.097804000 | 1.191269000  | 2.942952000  |
| C  | -2.381405000 | 0.104580000  | 3.445078000  |
| C  | -0.254033000 | 1.297216000  | 3.060647000  |
| C  | 0.955308000  | 2.214471000  | 1.263892000  |
| C  | 1.455093000  | 1.973398000  | -0.013225000 |
| C  | 0.758569000  | 2.477343000  | -1.180377000 |
| C  | -0.410775000 | 3.232412000  | -1.020334000 |
| C  | -1.543157000 | 3.000846000  | -1.902928000 |
| C  | -2.758109000 | 3.135206000  | -1.116546000 |
| C  | -3.844080000 | 2.296176000  | -1.366555000 |
| C  | -4.595375000 | 1.728804000  | -0.259381000 |
| C  | -4.599893000 | -0.329310000 | 1.711892000  |
| C  | -4.980314000 | -0.632747000 | 0.342979000  |
| C  | -4.978548000 | 0.375204000  | -0.622585000 |
| C  | -4.462679000 | 0.104632000  | -1.953272000 |
| C  | -3.762045000 | 1.291943000  | -2.414522000 |
| C  | -2.597408000 | 1.165188000  | -3.171151000 |
| C  | -1.464483000 | 2.036865000  | -2.908980000 |
| C  | -0.250333000 | 1.256141000  | -3.071992000 |
| C  | 0.840740000  | 1.475331000  | -2.230683000 |
| C  | 0.958991000  | 1.158890000  | 2.276416000  |
| C  | 1.208259000  | -2.026541000 | -1.042721000 |
| C  | 1.570939000  | -1.736608000 | 0.272195000  |
| C  | 0.829668000  | -2.295841000 | 1.380221000  |
| C  | -0.262493000 | -3.130142000 | 1.124958000  |
| C  | -0.643183000 | -3.435296000 | -0.243661000 |
| C  | -0.615598000 | -2.382087000 | -2.478345000 |
| C  | 0.085714000  | -1.194522000 | -2.940069000 |
| C  | 1.205162000  | -0.966830000 | -2.049390000 |
| C  | 1.586168000  | 0.338972000  | -1.715016000 |
| C  | 1.980780000  | 0.650052000  | -0.342511000 |
| C  | 2.013630000  | -0.385322000 | 0.642992000  |
| C  | 0.752969000  | -1.288355000 | 2.425992000  |
| C  | -0.418457000 | -1.159600000 | 3.177712000  |
| C  | -1.551729000 | -2.029568000 | 2.914593000  |
| C  | -1.475540000 | -2.996618000 | 1.910427000  |
| C  | -2.608762000 | -3.220509000 | 1.027793000  |
| C  | -2.093447000 | -3.491151000 | -0.303800000 |
| C  | -2.761485000 | -2.995712000 | -1.424539000 |
| C  | -2.007579000 | -2.429243000 | -2.530894000 |
| C  | -0.634961000 | -0.100968000 | -3.429402000 |
| C  | -2.083620000 | -0.155048000 | -3.495574000 |
| C  | -2.755603000 | -1.294612000 | -3.048861000 |
| C  | -3.971831000 | -1.163405000 | -2.267454000 |
| C  | -3.974153000 | -2.213477000 | -1.261578000 |
| C  | -4.468376000 | -1.953064000 | 0.016936000  |
| C  | -3.771134000 | -2.465934000 | 1.184432000  |
| C  | -3.851656000 | -1.461001000 | 2.232131000  |
| C  | -2.765920000 | -1.248798000 | 3.082171000  |
| C  | 1.462906000  | -0.106260000 | 1.979193000  |
| C  | -0.930093000 | 0.158411000  | 3.503008000  |
| C  | 0.080888000  | -2.896916000 | -1.309939000 |

$$E_g(\text{B3LYP}/6\text{-}31\text{G}(\text{d})) = -2708.58046$$

$$G_g(\text{B3LYP}/6\text{-}31\text{G}(\text{d})) = -2708.07582$$

$$E_s(\text{M06}/6\text{-}311\text{G}(\text{d},\text{p})//\text{B3LYP}/6\text{-}31\text{G}(\text{d})) = -2707.28775$$

$$G_s(\text{M06}/6\text{-}311\text{G}(\text{d},\text{p})//\text{B3LYP}/6\text{-}31\text{G}(\text{d})) = -2706.78311$$

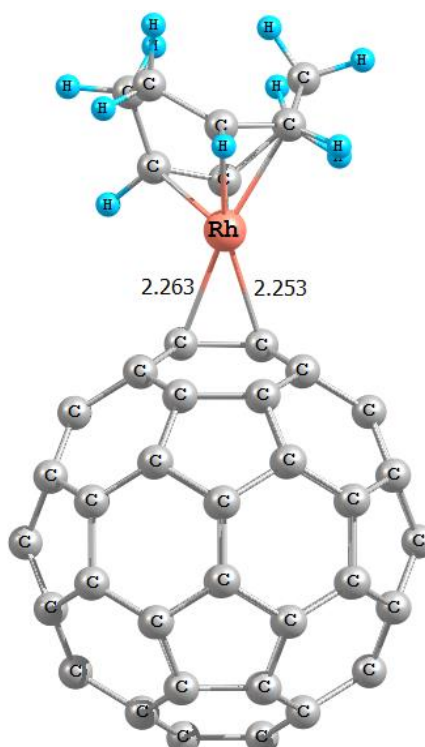

# O

|    |              |              |              |
|----|--------------|--------------|--------------|
| C  | -5.670218000 | -0.375965000 | -1.445163000 |
| C  | -4.582670000 | 1.649147000  | 0.244397000  |
| C  | -4.940910000 | 1.000747000  | 1.429307000  |
| C  | -6.279183000 | -0.863485000 | -0.274170000 |
| C  | -6.344323000 | 0.575213000  | 1.830518000  |
| C  | -7.155855000 | -0.043051000 | 0.668723000  |
| C  | -5.723813000 | 1.048838000  | -1.956440000 |
| C  | -5.551229000 | 2.104221000  | -0.842979000 |
| H  | -3.630223000 | 2.166394000  | 0.246896000  |
| H  | -4.242924000 | 1.080049000  | 2.263071000  |
| H  | -5.391782000 | -1.110679000 | -2.200208000 |
| H  | -6.429581000 | -1.941508000 | -0.215911000 |
| H  | -6.663487000 | 1.217139000  | -2.506849000 |
| H  | -5.172043000 | 3.030729000  | -1.288533000 |
| H  | -6.888202000 | 1.426374000  | 2.270156000  |
| H  | -7.932887000 | -0.694111000 | 1.084335000  |
| H  | -6.519598000 | 2.360386000  | -0.401300000 |
| H  | -4.916160000 | 1.164561000  | -2.688015000 |
| H  | -6.249221000 | -0.169175000 | 2.630460000  |
| H  | -7.684300000 | 0.735310000  | 0.109222000  |
| Rh | -4.155104000 | -0.554956000 | 0.114316000  |
| C  | 2.811612000  | 2.943198000  | 1.603090000  |
| C  | 2.027139000  | 3.502434000  | 0.514342000  |
| C  | 0.636724000  | 3.390284000  | 0.528466000  |
| C  | -0.028978000 | 2.719252000  | 1.632796000  |
| C  | 0.724756000  | 2.186624000  | 2.681206000  |
| C  | 2.173247000  | 2.298971000  | 2.664701000  |
| C  | 4.026476000  | 2.384006000  | 1.037694000  |
| C  | 3.995118000  | 2.599504000  | -0.400614000 |
| C  | 2.759975000  | 3.291267000  | -0.723879000 |
| C  | 2.072417000  | 2.982182000  | -1.899479000 |
| C  | -0.078721000 | 3.067136000  | -0.693725000 |
| C  | -1.155866000 | 1.980447000  | 1.097562000  |
| C  | -1.494826000 | 0.736537000  | 1.621723000  |
| C  | -0.702611000 | 0.177039000  | 2.697122000  |
| C  | 0.380430000  | 0.887549000  | 3.224322000  |
| C  | 1.614980000  | 0.193418000  | 3.550542000  |
| C  | 2.724481000  | 1.066333000  | 3.203588000  |
| C  | 3.891852000  | 0.528131000  | 2.658625000  |
| C  | 4.555355000  | 1.199964000  | 1.554271000  |
| C  | 4.493530000  | 1.622239000  | -1.264036000 |
| C  | 5.043344000  | 0.389170000  | -0.725481000 |
| C  | 5.073624000  | 0.182468000  | 0.654573000  |
| C  | 4.729228000  | -1.118725000 | 1.203359000  |
| C  | 3.999048000  | -0.905488000 | 2.441562000  |
| C  | 2.933821000  | -1.743305000 | 2.776671000  |
| C  | 1.716847000  | -1.182287000 | 3.340542000  |
| C  | 0.589132000  | -1.923766000 | 2.800490000  |
| C  | -0.596754000 | -1.254790000 | 2.479026000  |
| C  | -1.183305000 | 2.193418000  | -0.349510000 |
| C  | -0.849778000 | -2.330009000 | -1.033044000 |
| C  | -1.385597000 | -1.157993000 | -1.554054000 |
| C  | -0.710273000 | -0.487059000 | -2.643786000 |
| C  | 0.455869000  | -1.024354000 | -3.198032000 |
| C  | 1.005015000  | -2.253044000 | -2.660753000 |
| C  | 1.146152000  | -3.451437000 | -0.507623000 |
| C  | 0.413315000  | -3.239015000 | 0.729995000  |
| C  | -0.820724000 | -2.550471000 | 0.410387000  |
| C  | -1.323308000 | -1.582899000 | 1.271975000  |
| C  | -1.969690000 | -0.360452000 | 0.753826000  |
| C  | -1.987133000 | -0.144668000 | -0.671119000 |
| C  | -0.817008000 | 0.945634000  | -2.429440000 |
| C  | 0.247087000  | 1.784949000  | -2.770790000 |
| C  | 1.462662000  | 1.225409000  | -3.339259000 |
| C  | 1.564715000  | -0.150468000 | -3.545814000 |
| C  | 2.800711000  | -0.844448000 | -3.223604000 |
| C  | 2.453779000  | -2.145403000 | -2.675978000 |
| C  | 3.204606000  | -2.683484000 | -1.628997000 |
| C  | 2.537174000  | -3.353544000 | -0.524045000 |
| C  | 1.105894000  | -2.938915000 | 1.906212000  |
| C  | 2.555007000  | -2.829206000 | 1.887869000  |
| C  | 3.256556000  | -3.033070000 | 0.698364000  |
| C  | 4.364194000  | -2.161200000 | 0.349460000  |
| C  | 4.332777000  | -1.945812000 | -1.088914000 |
| C  | 4.667054000  | -0.696512000 | -1.615491000 |
| C  | 3.884635000  | -0.134822000 | -2.703721000 |
| C  | 3.777930000  | 1.298724000  | -2.486808000 |
| C  | 2.591490000  | 1.965028000  | -2.798654000 |
| C  | -1.559113000 | 1.160435000  | -1.203292000 |
| C  | 0.624271000  | 2.868470000  | -1.883924000 |
| C  | 0.363295000  | -2.888701000 | -1.594757000 |
| O  | -3.752911000 | -2.438427000 | -0.312826000 |
| H  | -4.528449000 | -2.888308000 | -0.684497000 |

$$E_g(\text{B3LYP}/6\text{-}31\text{G}(\text{d})) = -2784.61863$$

$$G_g(\text{B3LYP}/6\text{-}31\text{G}(\text{d})) = -2784.10258$$

$$E_s(\text{M06}/6\text{-}311\text{G}(\text{d,p})//\text{B3LYP}/6\text{-}31\text{G}(\text{d})) = -2783.28011$$

$$G_s(\text{M06}/6\text{-}311\text{G}(\text{d,p})//\text{B3LYP}/6\text{-}31\text{G}(\text{d})) = -2782.76406$$

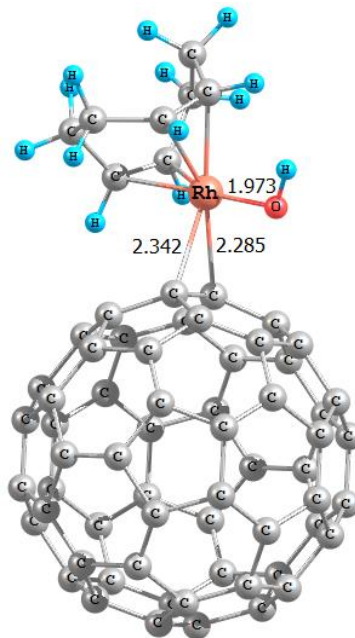

**P**

|    |              |              |              |
|----|--------------|--------------|--------------|
| Rh | -4.813404000 | 0.000036000  | -0.009126000 |
| C  | -2.826233000 | 0.735764000  | -0.044914000 |
| C  | -2.249431000 | 1.433699000  | -1.216570000 |
| C  | -2.826238000 | -0.735603000 | -0.045531000 |
| C  | -2.275590000 | 1.431175000  | 1.144500000  |
| C  | -1.802227000 | 0.734329000  | -2.331579000 |
| C  | -1.514906000 | 2.590632000  | -0.753179000 |
| C  | -2.249477000 | -1.432881000 | -1.217385000 |
| C  | -2.275648000 | -1.431729000 | 1.145691000  |
| C  | -1.532127000 | 2.589839000  | 0.699294000  |
| C  | -1.857235000 | 0.733544000  | 2.271458000  |
| C  | -1.802256000 | -0.732892000 | -2.332003000 |
| C  | -0.616600000 | 1.177446000  | -3.037997000 |
| C  | -0.379109000 | 3.032027000  | -1.438288000 |
| C  | -1.515005000 | -2.590117000 | -0.754663000 |
| C  | -1.532220000 | -2.590160000 | 0.697810000  |
| C  | -1.857259000 | -0.734755000 | 2.271036000  |
| C  | -0.413258000 | 3.030814000  | 1.412412000  |
| C  | -0.689071000 | 1.175888000  | 3.005996000  |
| C  | -0.616643000 | -1.175652000 | -3.038665000 |
| C  | 0.115586000  | 0.001008000  | -3.476410000 |
| C  | 0.080307000  | 2.310004000  | -2.606288000 |
| C  | 0.786623000  | 3.483394000  | -0.696090000 |
| C  | -0.379221000 | -3.031156000 | -1.440023000 |
| C  | -0.413371000 | -3.031589000 | 1.410676000  |
| C  | -0.689113000 | -1.177563000 | 3.005330000  |
| C  | 0.018135000  | 2.308504000  | 2.590721000  |
| C  | 0.769921000  | 3.483408000  | 0.698857000  |
| C  | 0.032310000  | -0.000981000 | 3.461076000  |
| C  | 0.080222000  | -2.308486000 | -2.607608000 |
| C  | 1.510681000  | 0.000979000  | -3.466221000 |
| C  | 1.533052000  | 2.308408000  | -2.590625000 |
| C  | 1.970521000  | 3.035320000  | -1.409762000 |
| C  | 0.786495000  | -3.482996000 | -0.698004000 |
| C  | 0.018052000  | -2.309963000 | 2.589403000  |
| C  | 0.769792000  | -3.483812000 | 0.698683000  |
| C  | 1.470675000  | 2.307156000  | 2.610158000  |
| C  | 1.936296000  | 3.034762000  | 1.440458000  |
| C  | 1.427159000  | -0.001012000 | 3.483904000  |
| C  | 1.532969000  | -2.306951000 | -2.591943000 |
| C  | 2.234502000  | -1.175778000 | -3.012314000 |
| C  | 2.234544000  | 1.177450000  | -3.011642000 |
| C  | 3.090578000  | 2.602314000  | -0.698084000 |
| C  | 1.970412000  | -3.034561000 | -1.411502000 |
| C  | 1.470589000  | -2.308680000 | 2.608839000  |
| C  | 1.936180000  | -3.035631000 | 1.438719000  |
| C  | 2.161689000  | 1.175866000  | 3.047381000  |
| C  | 3.073107000  | 2.601987000  | 0.755812000  |
| C  | 2.161646000  | -1.177666000 | 3.046709000  |
| C  | 3.400677000  | -0.726780000 | -2.272838000 |
| C  | 3.400702000  | 0.727986000  | -2.272422000 |
| C  | 3.820535000  | 1.425645000  | -1.138381000 |
| C  | 3.090485000  | -2.602002000 | -0.699578000 |
| C  | 3.073007000  | -2.602505000 | 0.754319000  |
| C  | 3.345090000  | 0.726626000  | 2.336307000  |
| C  | 3.792148000  | 1.424845000  | 1.212962000  |
| C  | 3.345062000  | -0.728064000 | 2.335890000  |
| C  | 3.820484000  | -1.425105000 | -1.139200000 |
| C  | 4.254753000  | 0.697842000  | 0.042530000  |
| C  | 3.792092000  | -1.425654000 | 1.212142000  |
| C  | 4.254727000  | -0.697997000 | 0.042130000  |
| O  | -6.715765000 | -0.000124000 | -0.062097000 |
| H  | -7.168090000 | -0.000264000 | 0.799736000  |

 $E_g(\text{B3LYP}/6\text{-}31\text{G}(\text{d})) = -2472.50705$  $G_g(\text{B3LYP}/6\text{-}31\text{G}(\text{d})) = -2472.16779$  $E_s(\text{M06}/6\text{-}311\text{G}(\text{d,p})//\text{B3LYP}/6\text{-}31\text{G}(\text{d})) = -2471.33783$  $G_s(\text{M06}/6\text{-}311\text{G}(\text{d,p})//\text{B3LYP}/6\text{-}31\text{G}(\text{d})) = -2470.99857$ 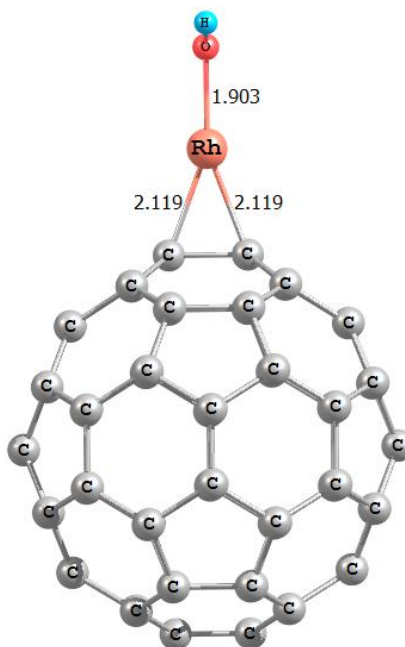

# COD

|   |              |              |              |
|---|--------------|--------------|--------------|
| C | 1.215278000  | 1.235989000  | -0.495464000 |
| C | 0.007831000  | -1.704672000 | -0.218025000 |
| C | -1.215377000 | -1.235946000 | -0.495314000 |
| C | -0.007909000 | 1.704615000  | -0.217940000 |
| C | -1.923413000 | 0.011271000  | -0.024557000 |
| C | -1.083000000 | 1.107362000  | 0.665747000  |
| C | 1.923460000  | -0.011055000 | -0.024466000 |
| C | 1.083149000  | -1.107490000 | 0.665428000  |
| H | 0.291009000  | -2.635246000 | -0.711120000 |
| H | -1.822335000 | -1.841702000 | -1.170579000 |
| H | 1.821992000  | 1.841654000  | -1.171016000 |
| H | -0.291604000 | 2.634764000  | -0.711550000 |
| H | 2.741401000  | 0.283415000  | 0.653185000  |
| H | 1.771517000  | -1.909927000 | 0.959262000  |
| H | -2.741803000 | -0.283107000 | 0.652601000  |
| H | -1.771208000 | 1.909783000  | 0.959992000  |
| H | 0.666337000  | -0.724051000 | 1.600186000  |
| H | 2.425308000  | -0.456013000 | -0.896678000 |
| H | -2.424705000 | 0.456468000  | -0.896979000 |
| H | -0.666024000 | 0.723515000  | 1.600249000  |

$$E_g(\text{B3LYP}/6\text{-}31\text{G}(\text{d})) = -312.02447$$

$$G_g(\text{B3LYP}/6\text{-}31\text{G}(\text{d})) = -311.87480$$

$$E_s(\text{M06}/6\text{-}311\text{G}(\text{d,p})//\text{B3LYP}/6\text{-}31\text{G}(\text{d})) = -311.85193$$

$$G_s(\text{M06}/6\text{-}311\text{G}(\text{d,p})//\text{B3LYP}/6\text{-}31\text{G}(\text{d})) = -311.70226$$

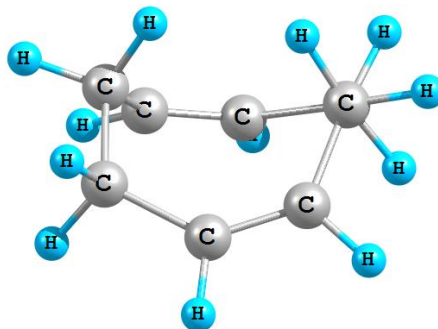



# Q

|    |              |              |              |
|----|--------------|--------------|--------------|
| Rh | 3.840604000  | -0.834988000 | -0.287687000 |
| O  | 6.845689000  | -0.869731000 | 1.747590000  |
| H  | 7.391168000  | -1.662081000 | 1.858687000  |
| B  | 6.538443000  | -0.696689000 | 0.367925000  |
| O  | 7.635022000  | -0.730240000 | -0.576458000 |
| H  | 8.403226000  | -0.283653000 | -0.195488000 |
| O  | 5.615647000  | -1.869487000 | -0.172887000 |
| H  | 5.992019000  | -2.143657000 | -1.028094000 |
| C  | 5.520204000  | 0.584438000  | 0.187348000  |
| C  | 5.070464000  | 0.931216000  | -1.131076000 |
| C  | 5.258459000  | 1.523842000  | 1.236618000  |
| C  | 4.468375000  | 2.196423000  | -1.385152000 |
| H  | 5.448870000  | 0.371302000  | -1.985326000 |
| C  | 4.691317000  | 2.749639000  | 0.970784000  |
| H  | 5.580726000  | 1.262260000  | 2.240037000  |
| C  | 4.298025000  | 3.091305000  | -0.351980000 |
| H  | 4.177738000  | 2.460694000  | -2.398067000 |
| H  | 4.547238000  | 3.472515000  | 1.770074000  |
| H  | 3.866845000  | 4.070296000  | -0.544188000 |
| C  | -2.656050000 | -0.665754000 | 3.361072000  |
| C  | -1.423072000 | 0.075972000  | 3.565438000  |
| C  | -1.364053000 | 1.433450000  | 3.249768000  |
| C  | -2.537170000 | 2.108129000  | 2.720220000  |
| C  | -3.721963000 | 1.396480000  | 2.523002000  |
| C  | -3.782105000 | -0.019138000 | 2.849328000  |
| C  | -2.305177000 | -1.996252000 | 2.890430000  |
| C  | -0.857312000 | -2.075650000 | 2.807086000  |
| C  | -0.314517000 | -0.797996000 | 3.219823000  |
| C  | 0.806088000  | -0.275667000 | 2.566828000  |
| C  | -0.193973000 | 1.977474000  | 2.578224000  |
| C  | -2.089862000 | 3.066459000  | 1.722973000  |
| C  | -2.846176000 | 3.274355000  | 0.568065000  |
| C  | -4.078067000 | 2.534317000  | 0.363243000  |
| C  | -4.508370000 | 1.614176000  | 1.321035000  |
| C  | -5.053920000 | 0.333240000  | 0.903123000  |
| C  | -4.604902000 | -0.675647000 | 1.847787000  |
| C  | -4.267380000 | -1.952734000 | 1.396066000  |
| C  | -3.095883000 | -2.625379000 | 1.926951000  |
| C  | -0.254785000 | -2.778740000 | 1.758241000  |
| C  | -1.079446000 | -3.432163000 | 0.754865000  |
| C  | -2.469590000 | -3.359258000 | 0.838527000  |
| C  | -3.259374000 | -3.142647000 | -0.363586000 |
| C  | -4.369354000 | -2.273898000 | -0.019092000 |
| C  | -4.805132000 | -1.305007000 | -0.925504000 |
| C  | -5.153013000 | 0.025158000  | -0.454702000 |
| C  | -4.709374000 | 0.984502000  | -1.452557000 |
| C  | -4.181439000 | 2.213472000  | -1.052070000 |
| C  | -0.642038000 | 2.983902000  | 1.639178000  |
| C  | -0.968992000 | 1.965711000  | -2.856645000 |
| C  | -0.173144000 | 2.587199000  | -1.889418000 |
| C  | 0.998052000  | 1.915094000  | -1.365993000 |
| C  | 1.341299000  | 0.651935000  | -1.826629000 |
| C  | 0.504233000  | -0.004441000 | -2.805625000 |
| C  | -1.855837000 | -0.103562000 | -3.528871000 |
| C  | -2.966147000 | 0.769116000  | -3.185499000 |
| C  | -2.416992000 | 2.048991000  | -2.768641000 |
| C  | -3.012834000 | 2.754833000  | -1.721651000 |
| C  | -2.184693000 | 3.407767000  | -0.719866000 |
| C  | -0.795029000 | 3.321867000  | -0.800952000 |
| C  | 1.104799000  | 2.236074000  | 0.061445000  |
| C  | 1.550975000  | 1.279911000  | 0.967562000  |
| C  | 1.996837000  | -0.055821000 | 0.513961000  |
| C  | 1.889098000  | -0.367211000 | -0.905740000 |
| C  | 1.239846000  | -1.646159000 | -1.292880000 |
| C  | 0.445401000  | -1.420293000 | -2.481722000 |
| C  | -0.738662000 | -2.134978000 | -2.683929000 |
| C  | -1.912576000 | -1.461758000 | -3.216822000 |
| C  | -4.088848000 | 0.247504000  | -2.540141000 |
| C  | -4.148191000 | -1.168181000 | -2.214515000 |
| C  | -3.081593000 | -2.005523000 | -2.546573000 |
| C  | -2.627961000 | -3.013661000 | -1.602261000 |
| C  | -1.180775000 | -3.091398000 | -1.689506000 |
| C  | -0.419694000 | -3.298063000 | -0.534025000 |
| C  | 0.808860000  | -2.558052000 | -0.334042000 |
| C  | 0.912928000  | -2.237240000 | 1.097449000  |
| C  | 1.431097000  | -1.011829000 | 1.494076000  |
| C  | -0.005666000 | 3.103056000  | 0.400362000  |
| C  | 0.871543000  | 1.157837000  | 2.238572000  |
| C  | -0.623065000 | 0.640160000  | -3.324758000 |

$$E_g(\text{B3LYP}/6\text{-}31\text{G}(\text{d})) = -2880.79587$$

$$G_g(\text{B3LYP}/6\text{-}31\text{G}(\text{d})) = -2880.34058$$

$$E_s(\text{M06}/6\text{-}311\text{G}(\text{d,p})//\text{B3LYP}/6\text{-}31\text{G}(\text{d})) = -2879.49395$$

$$G_s(\text{M06}/6\text{-}311\text{G}(\text{d,p})//\text{B3LYP}/6\text{-}31\text{G}(\text{d})) = -2879.03867$$

With Ph-B(OH)<sub>2</sub>

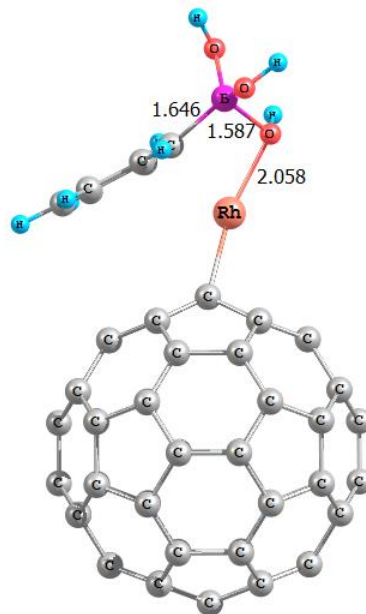

**Q**

|    |              |              |              |
|----|--------------|--------------|--------------|
| Rh | 3.598767000  | -0.639637000 | -0.499846000 |
| O  | 6.732766000  | -0.840041000 | 1.442856000  |
| B  | 6.313747000  | -0.480695000 | 0.126379000  |
| O  | 7.477965000  | -0.359284000 | -0.721782000 |
| O  | 5.406030000  | -1.617258000 | -0.544045000 |
| H  | 5.774457000  | -1.785285000 | -1.429243000 |
| C  | 5.259402000  | 0.766365000  | 0.087426000  |
| C  | 4.755116000  | 1.223983000  | -1.177261000 |
| C  | 5.017821000  | 1.594240000  | 1.230449000  |
| C  | 4.113930000  | 2.492020000  | -1.285516000 |
| H  | 5.118250000  | 0.766200000  | -2.096802000 |
| C  | 4.402110000  | 2.818600000  | 1.105385000  |
| H  | 5.394576000  | 1.251624000  | 2.189676000  |
| C  | 3.951350000  | 3.274062000  | -0.164003000 |
| H  | 3.785703000  | 2.846547000  | -2.258501000 |
| H  | 4.267350000  | 3.456022000  | 1.975732000  |
| H  | 3.486537000  | 4.253121000  | -0.244936000 |
| C  | -2.797094000 | -1.169149000 | 3.279040000  |
| C  | -1.581180000 | -0.421885000 | 3.553815000  |
| C  | -1.570192000 | 0.967022000  | 3.424322000  |
| C  | -2.776579000 | 1.668620000  | 3.019364000  |
| C  | -3.944879000 | 0.951736000  | 2.754323000  |
| C  | -3.955132000 | -0.496138000 | 2.886755000  |
| C  | -2.420861000 | -2.411519000 | 2.623934000  |
| C  | -0.974352000 | -2.431170000 | 2.496654000  |
| C  | -0.457550000 | -1.204251000 | 3.066731000  |
| C  | 0.629400000  | -0.562669000 | 2.465339000  |
| C  | -0.435555000 | 1.634552000  | 2.805596000  |
| C  | -2.385156000 | 2.767418000  | 2.151741000  |
| C  | -3.178695000 | 3.104173000  | 1.053295000  |
| C  | -4.393677000 | 2.358984000  | 0.778384000  |
| C  | -4.769644000 | 1.303669000  | 1.611436000  |
| C  | -5.289666000 | 0.074124000  | 1.056636000  |
| C  | -4.785572000 | -1.038042000 | 1.824793000  |
| C  | -4.424478000 | -2.231250000 | 1.196192000  |
| C  | -3.219029000 | -2.930671000 | 1.602742000  |
| C  | -0.380792000 | -2.967016000 | 1.349016000  |
| C  | -1.212908000 | -3.505954000 | 0.285376000  |
| C  | -2.601807000 | -3.489460000 | 0.410496000  |
| C  | -3.430369000 | -3.139080000 | -0.732101000 |
| C  | -4.555345000 | -2.360848000 | -0.247191000 |
| C  | -5.042761000 | -1.292771000 | -1.002795000 |
| C  | -5.416857000 | -0.050715000 | -0.347784000 |
| C  | -5.029456000 | 1.048891000  | -1.215909000 |
| C  | -4.526136000 | 2.228885000  | -0.664807000 |
| C  | -0.938105000 | 2.744169000  | 2.023243000  |
| C  | -1.358561000 | 2.331334000  | -2.559772000 |
| C  | -0.554870000 | 2.842684000  | -1.536187000 |
| C  | 0.649882000  | 2.144559000  | -1.136928000 |
| C  | 1.016198000  | 0.966360000  | -1.772482000 |
| C  | 0.171874000  | 0.421176000  | -2.811652000 |
| C  | -2.203035000 | 0.344159000  | -3.486548000 |
| C  | -3.328348000 | 1.125665000  | -3.001791000 |
| C  | -2.805207000 | 2.354425000  | -2.427693000 |
| C  | -3.392289000 | 2.893016000  | -1.281459000 |
| C  | -2.556672000 | 3.431742000  | -0.219576000 |
| C  | -1.167743000 | 3.402430000  | -0.343915000 |
| C  | 0.786437000  | 2.273197000  | 0.318427000  |
| C  | 1.284453000  | 1.218422000  | 1.075647000  |
| C  | 1.754747000  | -0.028978000 | 0.434188000  |
| C  | 1.617147000  | -0.149647000 | -1.011027000 |
| C  | 0.994845000  | -1.384228000 | -1.553031000 |
| C  | 0.162673000  | -1.026376000 | -2.681708000 |
| C  | -1.004737000 | -1.745662000 | -2.952351000 |
| C  | -2.211834000 | -1.044970000 | -3.360922000 |
| C  | -4.417451000 | 0.485804000  | -2.407494000 |
| C  | -4.426094000 | -0.962018000 | -2.275925000 |
| C  | -3.345349000 | -1.711980000 | -2.743381000 |
| C  | -2.837190000 | -2.823993000 | -1.956416000 |
| C  | -1.391059000 | -2.842130000 | -2.087493000 |
| C  | -0.592766000 | -3.177784000 | -0.988443000 |
| C  | 0.618542000  | -2.431925000 | -0.718228000 |
| C  | 0.752124000  | -2.303654000 | 0.740933000  |
| C  | 1.245612000  | -1.127055000 | 1.288331000  |
| C  | -0.339480000 | 3.050315000  | 0.797627000  |
| C  | 0.644371000  | 0.883685000  | 2.330704000  |
| C  | -0.987393000 | 1.093316000  | -3.211561000 |
| C  | 8.062473000  | -1.329150000 | 1.328751000  |
| H  | 8.061843000  | -2.420688000 | 1.181299000  |
| H  | 8.620413000  | -1.108157000 | 2.246280000  |
| C  | 8.621669000  | -0.605233000 | 0.089409000  |
| H  | 9.354762000  | -1.205684000 | -0.463375000 |
| H  | 9.099123000  | 0.347550000  | 0.366000000  |

 $E_g(\text{B3LYP}/6\text{-}31\text{G}(\text{d})) = -2958.20348$  $G_g(\text{B3LYP}/6\text{-}31\text{G}(\text{d})) = -2957.71256$  $E_s(\text{M06}/6\text{-}311\text{G}(\text{d,p})//\text{B3LYP}/6\text{-}31\text{G}(\text{d})) = -2956.84167$  $G_s(\text{M06}/6\text{-}311\text{G}(\text{d,p})//\text{B3LYP}/6\text{-}31\text{G}(\text{d})) = -2956.35075$ With Ph-B(O-C<sub>2</sub>H<sub>4</sub>-O)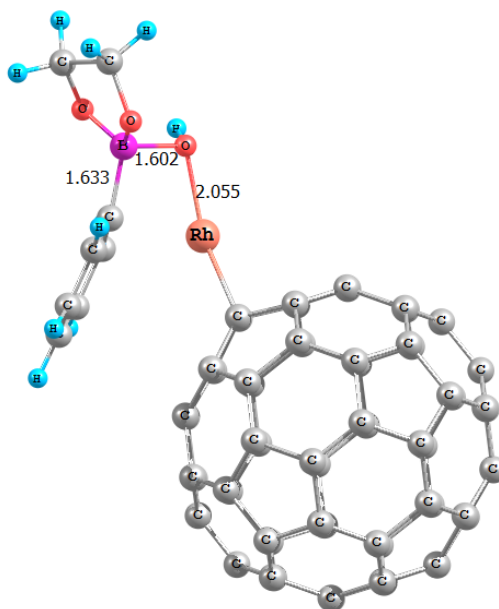

# Q

|    |              |              |              |
|----|--------------|--------------|--------------|
| Rh | 3.046007000  | -0.381969000 | -0.683858000 |
| O  | 6.287471000  | -0.686605000 | 1.112830000  |
| B  | 5.786627000  | -0.207425000 | -0.132763000 |
| O  | 6.900005000  | 0.044505000  | -1.013675000 |
| O  | 4.877726000  | -1.285589000 | -0.894876000 |
| H  | 5.220689000  | -1.346317000 | -1.804073000 |
| C  | 4.684232000  | 0.994272000  | 0.023136000  |
| C  | 4.117503000  | 1.588938000  | -1.155416000 |
| C  | 4.452054000  | 1.658681000  | 1.270314000  |
| C  | 3.425288000  | 2.832445000  | -1.079086000 |
| H  | 4.464117000  | 1.267824000  | -2.137246000 |
| C  | 3.785114000  | 2.861311000  | 1.323925000  |
| H  | 4.876795000  | 1.212843000  | 2.164972000  |
| C  | 3.272301000  | 3.456424000  | 0.138612000  |
| H  | 3.049301000  | 3.294293000  | -1.987642000 |
| H  | 3.656786000  | 3.375392000  | 2.273300000  |
| H  | 2.766793000  | 4.416554000  | 0.199472000  |
| C  | -3.223903000 | -1.701540000 | 3.104300000  |
| C  | -2.028819000 | -0.955593000 | 3.460962000  |
| C  | -2.071174000 | 0.436518000  | 3.538999000  |
| C  | -3.312101000 | 1.142076000  | 3.267001000  |
| C  | -4.460756000 | 0.426360000  | 2.923369000  |
| C  | -4.415295000 | -1.024473000 | 2.839499000  |
| C  | -2.820487000 | -2.818326000 | 2.264644000  |
| C  | -1.377886000 | -2.762527000 | 2.105955000  |
| C  | -0.890875000 | -1.613098000 | 2.840716000  |
| C  | 0.155752000  | -0.847122000 | 2.318391000  |
| C  | -0.977782000 | 1.231858000  | 3.002352000  |
| C  | -2.983391000 | 2.370593000  | 2.563199000  |
| C  | -3.817256000 | 2.834223000  | 1.543974000  |
| C  | -5.011679000 | 2.090401000  | 1.187215000  |
| C  | -5.327371000 | 0.910103000  | 1.862535000  |
| C  | -5.817913000 | -0.240946000 | 1.122496000  |
| C  | -5.253179000 | -1.436043000 | 1.726074000  |
| C  | -4.865938000 | -2.508552000 | 0.920364000  |
| C  | -3.625881000 | -3.211562000 | 1.194038000  |
| C  | -0.795760000 | -3.099170000 | 0.879130000  |
| C  | -1.635953000 | -3.506569000 | -0.235110000 |
| C  | -3.020720000 | -3.564785000 | -0.080400000 |
| C  | -3.891038000 | -3.082121000 | -1.141043000 |
| C  | -5.030502000 | -2.429781000 | -0.523015000 |
| C  | -5.576416000 | -1.281997000 | -1.101904000 |
| C  | -5.976492000 | -0.165418000 | -0.262339000 |
| C  | -5.650905000 | 1.064312000  | -0.965679000 |
| C  | -5.177040000 | 2.169282000  | -0.256395000 |
| C  | -1.540353000 | 2.423477000  | 2.403289000  |
| C  | -2.066118000 | 2.673553000  | -2.180755000 |
| C  | -1.254879000 | 3.060467000  | -1.108968000 |
| C  | -0.015804000 | 2.359697000  | -0.842365000 |
| C  | 0.375935000  | 1.303224000  | -1.652787000 |
| C  | -0.475223000 | 0.884716000  | -2.743816000 |
| C  | -2.862677000 | 0.814387000  | -3.373459000 |
| C  | -4.002241000 | 1.471377000  | -2.755601000 |
| C  | -3.508887000 | 2.622374000  | -2.016822000 |
| C  | -4.084680000 | 2.962043000  | -0.791108000 |
| C  | -3.240988000 | 3.369517000  | 0.321275000  |
| C  | -1.855712000 | 3.414898000  | 0.165510000  |
| C  | 0.154993000  | 2.278744000  | 0.612617000  |
| C  | 0.711052000  | 1.144445000  | 1.194868000  |
| C  | 1.208064000  | 0.024213000  | 0.365800000  |
| C  | 1.037384000  | 0.111870000  | -1.078607000 |
| C  | 0.444726000  | -1.052499000 | -1.784512000 |
| C  | -0.428913000 | -0.565341000 | -2.830229000 |
| C  | -1.576623000 | -1.282640000 | -3.179901000 |
| C  | -2.818252000 | -0.577337000 | -3.455433000 |
| C  | -5.051272000 | 0.708107000  | -2.239996000 |
| C  | -5.004795000 | -0.742546000 | -2.324232000 |
| C  | -3.910469000 | -1.371960000 | -2.919896000 |
| C  | -3.342063000 | -2.566449000 | -2.316747000 |
| C  | -1.900281000 | -2.508304000 | -2.478652000 |
| C  | -1.061676000 | -2.970712000 | -1.458691000 |
| C  | 0.128909000  | -2.225732000 | -1.106556000 |
| C  | 0.295703000  | -2.308327000 | 0.352772000  |
| C  | 0.760258000  | -1.206657000 | 1.058261000  |
| C  | -0.985607000 | 2.930742000  | 1.224854000  |
| C  | 0.115823000  | 0.602749000  | 2.399393000  |
| C  | -1.667919000 | 1.562140000  | -3.016265000 |
| C  | 7.655863000  | -1.078103000 | 0.916720000  |
| C  | 7.691010000  | -2.567351000 | 0.528927000  |
| H  | 7.175604000  | -2.745630000 | -0.419105000 |
| H  | 8.716410000  | -2.946085000 | 0.446319000  |
| H  | 7.172681000  | -3.142681000 | 1.303010000  |
| C  | 8.407563000  | -0.879622000 | 2.235180000  |
| H  | 8.286313000  | 0.137879000  | 2.614876000  |
| H  | 8.013685000  | -1.568904000 | 2.990086000  |
| H  | 9.478530000  | -1.084139000 | 2.116966000  |
| C  | 8.112302000  | -0.124349000 | -0.257985000 |
| C  | 9.186006000  | -0.703969000 | -1.182132000 |
| H  | 9.416442000  | 0.015549000  | -1.975578000 |
| H  | 10.113137000 | -0.909800000 | -0.633694000 |
| H  | 8.849298000  | -1.629718000 | -1.655550000 |
| C  | 8.553883000  | 1.263536000  | 0.238298000  |
| H  | 9.517218000  | 1.229108000  | 0.759810000  |
| H  | 8.654193000  | 1.930205000  | -0.624720000 |
| H  | 7.808312000  | 1.694733000  | 0.913613000  |

$$E_g(\text{B3LYP}/6\text{-}31\text{G}(\text{d})) = -3115.47051$$

$$G_g(\text{B3LYP}/6\text{-}31\text{G}(\text{d})) = -3114.87294$$

$$E_s(\text{M06}/6\text{-}311\text{G}(\text{d,p})//\text{B3LYP}/6\text{-}31\text{G}(\text{d})) = -3114.03025$$

$$G_s(\text{M06}/6\text{-}311\text{G}(\text{d,p})//\text{B3LYP}/6\text{-}31\text{G}(\text{d})) = -3113.43268$$

With Ph-B(O-C<sub>2</sub>(Me)<sub>2</sub>H<sub>4</sub>-O)

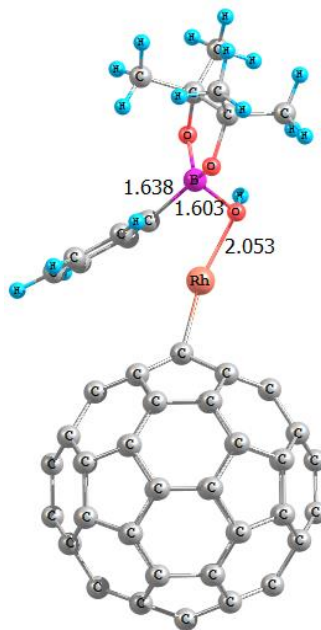

# Q-R

|    |              |              |              |
|----|--------------|--------------|--------------|
| Rh | 3.826601000  | 0.055534000  | 0.129188000  |
| O  | 6.743622000  | -2.283369000 | 0.759576000  |
| H  | 6.662631000  | -2.059882000 | 1.696023000  |
| B  | 5.675153000  | -1.792047000 | 0.001191000  |
| O  | 5.585156000  | -2.262301000 | -1.316855000 |
| H  | 6.404670000  | -2.724429000 | -1.544882000 |
| O  | 4.333688000  | -1.830514000 | 0.688247000  |
| H  | 3.751651000  | -2.448245000 | 0.207114000  |
| C  | 5.948378000  | 0.172814000  | -0.052841000 |
| C  | 6.450420000  | 0.634544000  | -1.290627000 |
| C  | 6.410605000  | 0.811760000  | 1.123160000  |
| C  | 7.368324000  | 1.682467000  | -1.351858000 |
| H  | 6.129044000  | 0.138385000  | -2.202518000 |
| C  | 7.320763000  | 1.870612000  | 1.063734000  |
| H  | 6.064345000  | 0.472502000  | 2.098695000  |
| C  | 7.799580000  | 2.304732000  | -0.174624000 |
| H  | 7.753386000  | 2.014435000  | -2.313011000 |
| H  | 7.663005000  | 2.348232000  | 1.978477000  |
| H  | 8.513708000  | 3.122742000  | -0.223528000 |
| C  | -0.917569000 | 1.023324000  | -3.311255000 |
| C  | -2.369241000 | 1.034210000  | -3.361789000 |
| C  | -3.085332000 | 1.998015000  | -2.649514000 |
| C  | -2.378172000 | 2.991712000  | -1.857517000 |
| C  | -0.984218000 | 2.977565000  | -1.804206000 |
| C  | -0.236774000 | 1.975105000  | -2.544861000 |
| C  | -0.480566000 | -0.356947000 | -3.294067000 |
| C  | -1.659799000 | -1.207053000 | -3.337216000 |
| C  | -2.829012000 | -0.345268000 | -3.378907000 |
| C  | -3.985056000 | -0.704590000 | -2.683505000 |
| C  | -4.288518000 | 1.624713000  | -1.928256000 |
| C  | -3.149292000 | 3.236138000  | -0.648849000 |
| C  | -2.494320000 | 3.461597000  | 0.565261000  |
| C  | -1.042845000 | 3.453401000  | 0.617685000  |
| C  | -0.300363000 | 3.212916000  | -0.543181000 |
| C  | 0.869931000  | 2.360330000  | -0.498758000 |
| C  | 0.908880000  | 1.586778000  | -1.747652000 |
| C  | 1.332814000  | 0.263697000  | -1.736925000 |
| C  | 0.617493000  | -0.725908000 | -2.511491000 |
| C  | -1.692360000 | -2.393250000 | -2.603748000 |
| C  | -0.547369000 | -2.780867000 | -1.795579000 |
| C  | 0.582976000  | -1.960885000 | -1.747906000 |
| C  | 1.281749000  | -1.741555000 | -0.499913000 |
| C  | 1.848766000  | -0.371872000 | -0.502288000 |
| C  | 1.807506000  | 0.395475000  | 0.745536000  |
| C  | 1.255965000  | 1.769674000  | 0.699571000  |
| C  | 0.477082000  | 2.000432000  | 1.897451000  |
| C  | -0.645036000 | 2.833415000  | 1.864313000  |
| C  | -4.328127000 | 2.390018000  | -0.691648000 |
| C  | -3.060759000 | 0.423520000  | 3.280784000  |
| C  | -4.160377000 | 0.795634000  | 2.505416000  |
| C  | -4.862681000 | -0.200718000 | 1.714960000  |
| C  | -4.436024000 | -1.529742000 | 1.729733000  |
| C  | -3.291959000 | -1.917230000 | 2.535055000  |
| C  | -1.164947000 | -0.966830000 | 3.349394000  |
| C  | -0.712373000 | 0.408517000  | 3.363492000  |
| C  | -1.881482000 | 1.271925000  | 3.322507000  |
| C  | -1.848634000 | 2.458309000  | 2.589083000  |
| C  | -2.993393000 | 2.846797000  | 1.782870000  |
| C  | -4.125957000 | 2.032034000  | 1.741160000  |
| C  | -5.262988000 | 0.419442000  | 0.462691000  |
| C  | -5.225325000 | -0.314582000 | -0.723758000 |
| C  | -4.785159000 | -1.699737000 | -0.708468000 |
| C  | -4.397029000 | -2.295226000 | 0.493307000  |
| C  | -3.227141000 | -3.153784000 | 0.533776000  |
| C  | -2.541290000 | -2.918137000 | 1.794262000  |
| C  | -1.146822000 | -2.920025000 | 1.840251000  |
| C  | -0.441804000 | -1.925099000 | 2.631646000  |
| C  | 0.442606000  | 0.765051000  | 2.660772000  |
| C  | 1.200668000  | -0.232059000 | 1.937865000  |
| C  | 0.763611000  | -1.551234000 | 1.919914000  |
| C  | 0.801559000  | -2.321807000 | 0.669780000  |
| C  | -0.378800000 | -3.163734000 | 0.630898000  |
| C  | -1.039438000 | -3.394488000 | -0.579587000 |
| C  | -2.491293000 | -3.388488000 | -0.629035000 |
| C  | -2.895595000 | -2.768760000 | -1.880735000 |
| C  | -4.019099000 | -1.941150000 | -1.919252000 |
| C  | -4.807909000 | 1.799699000  | 0.479432000  |
| C  | -4.729796000 | 0.300188000  | -1.943846000 |
| C  | -2.616721000 | -0.961050000 | 3.295986000  |

$E_g(\text{B3LYP}/6\text{-}31\text{G}(\text{d})) = -2880.78875$

$G_g(\text{B3LYP}/6\text{-}31\text{G}(\text{d})) = -2880.33658$

$E_s(\text{M06}/6\text{-}311\text{G}(\text{d},\text{p})//\text{B3LYP}/6\text{-}31\text{G}(\text{d})) = -2879.48106$

$G_s(\text{M06}/6\text{-}311\text{G}(\text{d},\text{p})//\text{B3LYP}/6\text{-}31\text{G}(\text{d})) = -2879.02890$

With Ph-B(OH)<sub>2</sub>

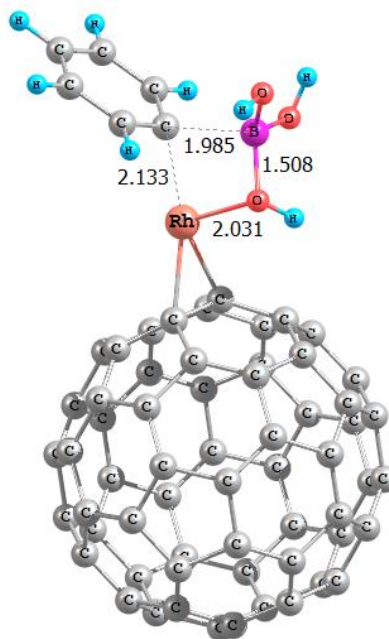

# Q-R

|    |              |              |              |
|----|--------------|--------------|--------------|
| Rh | 3.594519000  | -0.407642000 | -0.170244000 |
| O  | 6.590084000  | 1.673880000  | -1.140581000 |
| B  | 5.499962000  | 1.353558000  | -0.316318000 |
| O  | 5.576966000  | 2.021725000  | 0.923523000  |
| O  | 4.179126000  | 1.369736000  | -0.977846000 |
| H  | 3.623269000  | 2.073905000  | -0.595709000 |
| C  | 5.695459000  | -0.620303000 | 0.018672000  |
| C  | 6.182679000  | -0.949300000 | 1.303889000  |
| C  | 6.178718000  | -1.361953000 | -1.084821000 |
| C  | 7.100816000  | -1.984993000 | 1.480573000  |
| H  | 5.850366000  | -0.367947000 | 2.160252000  |
| C  | 7.090105000  | -2.405918000 | -0.906441000 |
| H  | 5.858846000  | -1.101326000 | -2.091007000 |
| C  | 7.548557000  | -2.718323000 | 0.375907000  |
| H  | 7.473184000  | -2.218935000 | 2.475044000  |
| H  | 7.451493000  | -2.965327000 | -1.765712000 |
| H  | 8.263015000  | -3.525798000 | 0.514798000  |
| C  | -1.167000000 | -0.776505000 | 3.381561000  |
| C  | -2.615021000 | -0.677482000 | 3.444661000  |
| C  | -3.408345000 | -1.642033000 | 2.820815000  |
| C  | -2.785266000 | -2.746255000 | 2.108164000  |
| C  | -1.394672000 | -2.837990000 | 2.043140000  |
| C  | -0.566916000 | -1.835239000 | 2.692294000  |
| C  | -0.631956000 | 0.562186000  | 3.246486000  |
| C  | -1.746317000 | 1.496026000  | 3.227722000  |
| C  | -2.973811000 | 0.728299000  | 3.350029000  |
| C  | -4.110388000 | 1.112630000  | 2.636338000  |
| C  | -4.591567000 | -1.242555000 | 2.080449000  |
| C  | -3.588829000 | -3.032515000 | 0.930342000  |
| C  | -2.968043000 | -3.403678000 | -0.263974000 |
| C  | -1.520683000 | -3.505400000 | -0.330004000 |
| C  | -0.746629000 | -3.225027000 | 0.800752000  |
| C  | 0.481671000  | -2.466950000 | 0.676817000  |
| C  | 0.592916000  | -1.598067000 | 1.856305000  |
| C  | 1.111862000  | -0.314563000 | 1.733371000  |
| C  | 0.479115000  | 0.785035000  | 2.428104000  |
| C  | -1.704072000 | 2.617918000  | 2.399688000  |
| C  | -0.545164000 | 2.854382000  | 1.553646000  |
| C  | 0.522284000  | 1.952939000  | 1.565530000  |
| C  | 1.184603000  | 1.580802000  | 0.334065000  |
| C  | 1.652296000  | 0.179289000  | 0.445291000  |
| C  | 1.539764000  | -0.683856000 | -0.732531000 |
| C  | 0.892969000  | -2.005994000 | -0.560991000 |
| C  | 0.082555000  | -2.277314000 | -1.737427000 |
| C  | -1.096350000 | -3.020611000 | -1.626551000 |
| C  | -4.702463000 | -2.101591000 | 0.911656000  |
| C  | -3.351807000 | -0.565943000 | -3.219202000 |
| C  | -4.464756000 | -0.792338000 | -2.407644000 |
| C  | -5.083136000 | 0.314262000  | -1.697740000 |
| C  | -4.562115000 | 1.603093000  | -1.826389000 |
| C  | -3.404036000 | 1.838926000  | -2.669907000 |
| C  | -1.361834000 | 0.672294000  | -3.418386000 |
| C  | -1.009819000 | -0.728575000 | -3.320634000 |
| C  | -2.237315000 | -1.497946000 | -3.199085000 |
| C  | -2.279527000 | -2.619808000 | -2.370804000 |
| C  | -3.438496000 | -2.837254000 | -1.526776000 |
| C  | -4.508774000 | -1.961234000 | -1.543937000 |
| C  | -5.509716000 | -0.169981000 | -0.395141000 |
| C  | -5.403690000 | 0.654438000  | 0.726342000  |
| C  | -4.864507000 | 1.997604000  | 0.592239000  |
| C  | -4.450731000 | 2.461952000  | -0.657742000 |
| C  | -3.222893000 | 3.226989000  | -0.778285000 |
| C  | -2.573183000 | 2.839841000  | -2.020304000 |
| C  | -1.182921000 | 2.736715000  | -2.077064000 |
| C  | -0.561800000 | 1.631458000  | -2.788912000 |
| C  | 0.125813000  | -1.109493000 | -2.599652000 |
| C  | 0.963320000  | -0.114224000 | -1.968090000 |
| C  | 0.623012000  | 1.230339000  | -2.057910000 |
| C  | 0.732805000  | 2.096552000  | -0.876435000 |
| C  | -0.382902000 | 3.023081000  | -0.898414000 |
| C  | -1.008632000 | 3.399481000  | 0.294208000  |
| C  | -2.456170000 | 3.502396000  | 0.355185000  |
| C  | -2.886789000 | 3.019039000  | 1.657026000  |
| C  | -4.066442000 | 2.281551000  | 1.772874000  |
| C  | -5.154544000 | -1.576294000 | -0.300511000 |
| C  | -4.935991000 | 0.107333000  | 1.989141000  |
| C  | -2.809485000 | 0.776595000  | -3.353084000 |
| C  | 6.822762000  | 2.727567000  | 0.944100000  |
| H  | 6.620384000  | 3.804230000  | 0.845254000  |
| H  | 7.334356000  | 2.553455000  | 1.896839000  |
| C  | 7.602735000  | 2.169410000  | -0.267614000 |
| H  | 8.190115000  | 2.930884000  | -0.790322000 |
| H  | 8.275531000  | 1.352707000  | 0.031110000  |

$E_g(\text{B3LYP}/6\text{-}31\text{G}(\text{d})) = -2958.19333$

$G_g(\text{B3LYP}/6\text{-}31\text{G}(\text{d})) = -2957.70488$

$E_s(\text{M06}/6\text{-}311\text{G}(\text{d,p})//\text{B3LYP}/6\text{-}31\text{G}(\text{d})) = -2956.82675$

$G_s(\text{M06}/6\text{-}311\text{G}(\text{d,p})//\text{B3LYP}/6\text{-}31\text{G}(\text{d})) = -2956.33830$

With Ph-B(O-C<sub>2</sub>H<sub>4</sub>-O)

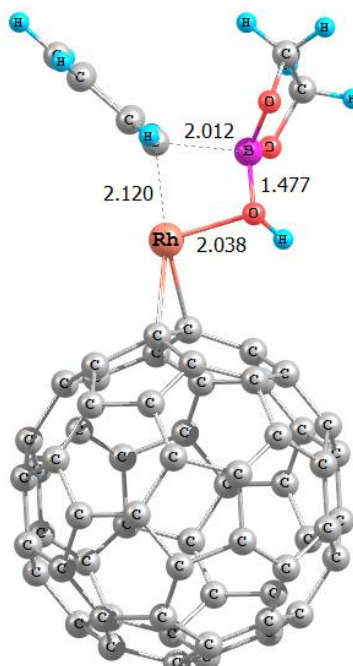

# Q-R

|    |              |              |              |
|----|--------------|--------------|--------------|
| Rh | 3.096438000  | -1.405366000 | 0.048363000  |
| O  | 5.666291000  | 1.010816000  | -0.955609000 |
| B  | 5.193615000  | 0.794709000  | 0.311956000  |
| O  | 6.000546000  | 1.254784000  | 1.320409000  |
| O  | 3.802490000  | 0.612150000  | 0.565087000  |
| H  | 3.616653000  | 0.763254000  | 1.506523000  |
| C  | 5.330224000  | -1.778800000 | 0.159286000  |
| C  | 4.750373000  | -2.621595000 | 1.177270000  |
| C  | 4.943611000  | -2.092451000 | -1.198201000 |
| C  | 3.659381000  | -3.472618000 | 0.916088000  |
| H  | 5.078539000  | -2.512707000 | 2.209913000  |
| C  | 3.870572000  | -2.950455000 | -1.498163000 |
| H  | 5.409970000  | -1.542773000 | -2.012783000 |
| C  | 3.148048000  | -3.558680000 | -0.419275000 |
| H  | 3.139271000  | -3.992027000 | 1.716951000  |
| H  | 3.511781000  | -3.077640000 | -2.516310000 |
| H  | 2.267313000  | -4.155201000 | -0.625326000 |
| C  | -2.462715000 | -2.934356000 | 1.722167000  |
| C  | -3.857841000 | -2.531489000 | 1.706962000  |
| C  | -4.568027000 | -2.515945000 | 0.504949000  |
| C  | -3.909738000 | -2.902169000 | -0.733213000 |
| C  | -2.567015000 | -3.281433000 | -0.719937000 |
| C  | -1.826252000 | -3.297699000 | 0.530321000  |
| C  | -1.765890000 | -2.100886000 | 2.677027000  |
| C  | -2.726796000 | -1.179448000 | 3.262389000  |
| C  | -4.022498000 | -1.446679000 | 2.661134000  |
| C  | -4.888489000 | -0.390146000 | 2.373574000  |
| C  | -5.470239000 | -1.418645000 | 0.207737000  |
| C  | -4.412658000 | -2.047077000 | -1.796545000 |
| C  | -3.552918000 | -1.611998000 | -2.807197000 |
| C  | -2.157365000 | -2.013984000 | -2.798405000 |
| C  | -1.670710000 | -2.829868000 | -1.771255000 |
| C  | -0.374948000 | -2.558108000 | -1.179123000 |
| C  | -0.472585000 | -2.860618000 | 0.259330000  |
| C  | 0.201364000  | -2.066571000 | 1.179297000  |
| C  | -0.464450000 | -1.669021000 | 2.399071000  |
| C  | -2.349317000 | 0.131011000  | 3.555225000  |
| C  | -0.994237000 | 0.578093000  | 3.274075000  |
| C  | -0.071428000 | -0.304591000 | 2.703357000  |
| C  | 0.840608000  | 0.142608000  | 1.673444000  |
| C  | 1.129743000  | -0.988901000 | 0.752578000  |
| C  | 1.228015000  | -0.692736000 | -0.694138000 |
| C  | 0.390743000  | -1.495954000 | -1.621354000 |
| C  | -0.123131000 | -0.636892000 | -2.664118000 |
| C  | -1.365036000 | -0.892899000 | -3.254589000 |
| C  | -5.374320000 | -1.128672000 | -1.215169000 |
| C  | -2.850549000 | 2.440208000  | -2.678803000 |
| C  | -4.152582000 | 2.013274000  | -2.410802000 |
| C  | -4.804046000 | 2.401803000  | -1.171394000 |
| C  | -4.126834000 | 3.202175000  | -0.248913000 |
| C  | -2.773231000 | 3.645328000  | -0.526986000 |
| C  | -0.751400000 | 2.867843000  | -1.709461000 |
| C  | -0.593351000 | 1.786752000  | -2.656618000 |
| C  | -1.889115000 | 1.518731000  | -3.260476000 |
| C  | -2.266660000 | 0.208448000  | -3.554023000 |
| C  | -3.621331000 | -0.237090000 | -3.275189000 |
| C  | -4.545644000 | 0.646517000  | -2.715207000 |
| C  | -5.599931000 | 1.276574000  | -0.709847000 |
| C  | -5.692248000 | 0.998507000  | 0.654962000  |
| C  | -4.991793000 | 1.833839000  | 1.616398000  |
| C  | -4.223111000 | 2.912605000  | 1.174232000  |
| C  | -2.928551000 | 3.176327000  | 1.775098000  |
| C  | -2.029815000 | 3.624838000  | 0.722839000  |
| C  | -0.692715000 | 3.227179000  | 0.732011000  |
| C  | -0.037718000 | 2.838664000  | -0.506223000 |
| C  | 0.269797000  | 0.726990000  | -2.358216000 |
| C  | 1.028710000  | 0.713373000  | -1.128549000 |
| C  | 0.868020000  | 1.748097000  | -0.217307000 |
| C  | 0.770662000  | 1.455177000  | 1.221697000  |
| C  | -0.193536000 | 2.371270000  | 1.794992000  |
| C  | -1.057023000 | 1.946609000  | 2.810652000  |
| C  | -2.451011000 | 2.354042000  | 2.797656000  |
| C  | -3.251543000 | 1.231255000  | 3.258770000  |
| C  | -4.495739000 | 0.976185000  | 2.679095000  |
| C  | -5.439482000 | 0.191907000  | -1.663986000 |
| C  | -5.627513000 | -0.375943000 | 1.123154000  |
| C  | -2.145796000 | 3.273011000  | -1.717534000 |
| C  | 6.899674000  | 1.773985000  | -0.816953000 |
| C  | 7.918083000  | 1.226933000  | -1.815857000 |
| H  | 7.550371000  | 1.383416000  | -2.835414000 |
| H  | 8.878530000  | 1.746369000  | -1.719791000 |
| H  | 8.083617000  | 0.156762000  | -1.673493000 |
| C  | 6.546652000  | 3.226114000  | -1.166822000 |
| H  | 5.798287000  | 3.631385000  | -0.478594000 |
| H  | 7.428044000  | 3.876001000  | -1.145657000 |
| H  | 6.123092000  | 3.252747000  | -2.175662000 |
| C  | 7.288018000  | 1.565676000  | 0.710909000  |
| C  | 8.208027000  | 0.363120000  | 0.957838000  |
| H  | 7.777934000  | -0.547752000 | 0.533953000  |
| H  | 9.207488000  | 0.530055000  | 0.541810000  |
| H  | 8.309226000  | 0.215489000  | 2.038296000  |
| C  | 7.850537000  | 2.806520000  | 1.403514000  |
| H  | 8.800275000  | 3.109528000  | 0.948049000  |
| H  | 7.157287000  | 3.649631000  | 1.359174000  |
| H  | 8.039978000  | 2.579581000  | 2.457646000  |

$$E_g(\text{B3LYP}/6\text{-}31\text{G}(\text{d})) = -3115.44889$$

$$G_g(\text{B3LYP}/6\text{-}31\text{G}(\text{d})) = -3114.85107$$

$$E_s(\text{M06}/6\text{-}311\text{G}(\text{d},\text{p})//\text{B3LYP}/6\text{-}31\text{G}(\text{d})) = -3114.01156$$

$$G_s(\text{M06}/6\text{-}311\text{G}(\text{d},\text{p})//\text{B3LYP}/6\text{-}31\text{G}(\text{d})) = -3113.41374$$

With Ph-B(O-C<sub>2</sub>(Me)<sub>2</sub>H<sub>4</sub>-O)

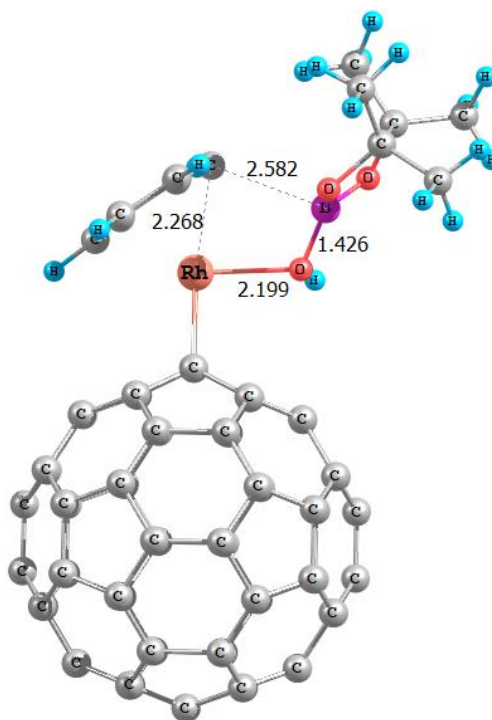

# Q-R

|    |              |              |              |
|----|--------------|--------------|--------------|
| Rh | -3.044222000 | 0.855589000  | -0.203431000 |
| O  | -6.261335000 | -0.765330000 | -1.193078000 |
| B  | -5.223571000 | -0.648164000 | -0.262391000 |
| O  | -5.533334000 | -1.281134000 | 0.949087000  |
| O  | -3.846491000 | -0.932678000 | -0.741729000 |
| H  | -3.446979000 | -1.607497000 | -0.162220000 |
| C  | -5.072031000 | 1.397625000  | -0.024385000 |
| C  | -5.416487000 | 1.896304000  | 1.252316000  |
| C  | -5.510303000 | 2.117267000  | -1.159710000 |
| C  | -6.157915000 | 3.070621000  | 1.388913000  |
| H  | -5.119196000 | 1.341630000  | 2.138764000  |
| C  | -6.248640000 | 3.295554000  | -1.022837000 |
| H  | -5.295866000 | 1.736432000  | -2.154916000 |
| C  | -6.570821000 | 3.772197000  | 0.250402000  |
| H  | -6.422610000 | 3.435854000  | 2.378270000  |
| H  | -6.580432000 | 3.834789000  | -1.906656000 |
| H  | -7.149845000 | 4.686035000  | 0.357354000  |
| C  | 1.763537000  | 1.091569000  | 3.294991000  |
| C  | 3.197797000  | 0.871758000  | 3.362940000  |
| C  | 4.065952000  | 1.700708000  | 2.650301000  |
| C  | 3.533928000  | 2.783929000  | 1.838335000  |
| C  | 2.155854000  | 2.990989000  | 1.768112000  |
| C  | 1.250746000  | 2.129451000  | 2.510356000  |
| C  | 1.112219000  | -0.201618000 | 3.287810000  |
| C  | 2.140336000  | -1.227695000 | 3.354819000  |
| C  | 3.431631000  | -0.562720000 | 3.401440000  |
| C  | 4.523072000  | -1.110768000 | 2.725012000  |
| C  | 5.201389000  | 1.130818000  | 1.947667000  |
| C  | 4.346230000  | 2.886368000  | 0.636406000  |
| C  | 3.747357000  | 3.196574000  | -0.586065000 |
| C  | 2.313691000  | 3.418373000  | -0.658053000 |
| C  | 1.530727000  | 3.315136000  | 0.496343000  |
| C  | 0.240158000  | 2.658480000  | 0.447000000  |
| C  | 0.065362000  | 1.918721000  | 1.703926000  |
| C  | -0.562946000 | 0.679183000  | 1.701490000  |
| C  | -0.022311000 | -0.401385000 | 2.496078000  |
| C  | 1.991236000  | -2.413106000 | 2.635186000  |
| C  | 0.807056000  | -2.625329000 | 1.818445000  |
| C  | -0.178182000 | -1.636570000 | 1.747819000  |
| C  | -0.820232000 | -1.324465000 | 0.488544000  |
| C  | -1.160510000 | 0.117603000  | 0.468491000  |
| C  | -0.983828000 | 0.850176000  | -0.786228000 |
| C  | -0.223088000 | 2.120927000  | -0.749233000 |
| C  | 0.594558000  | 2.209508000  | -1.940421000 |
| C  | 1.834824000  | 2.853538000  | -1.902435000 |
| C  | 5.374548000  | 1.863547000  | 0.702953000  |
| C  | 3.850590000  | 0.071744000  | -3.261580000 |
| C  | 4.987419000  | 0.274439000  | -2.477604000 |
| C  | 5.513915000  | -0.810559000 | -1.667462000 |
| C  | 4.882245000  | -2.056030000 | -1.673565000 |
| C  | 3.698508000  | -2.266212000 | -2.487867000 |
| C  | 1.758090000  | -1.000087000 | -3.337502000 |
| C  | 1.530537000  | 0.429330000  | -3.372756000 |
| C  | 2.821859000  | 1.096023000  | -3.326949000 |
| C  | 2.970600000  | 2.281758000  | -2.607504000 |
| C  | 4.154760000  | 2.494849000  | -1.792776000 |
| C  | 5.143120000  | 1.511031000  | -1.728461000 |
| C  | 5.994926000  | -0.245738000 | -0.417631000 |
| C  | 5.829582000  | -0.948983000 | 0.776739000  |
| C  | 5.174303000  | -2.246386000 | 0.771207000  |
| C  | 4.708251000  | -2.787601000 | -0.428570000 |
| C  | 3.417309000  | -3.450070000 | -0.473904000 |
| C  | 2.790412000  | -3.125406000 | -1.745300000 |
| C  | 1.413712000  | -2.906376000 | -1.808383000 |
| C  | 0.883858000  | -1.822532000 | -2.619731000 |
| C  | 0.439783000  | 0.974325000  | -2.688850000 |
| C  | -0.474583000 | 0.119523000  | -1.964300000 |
| C  | -0.253776000 | -1.252284000 | -1.926507000 |
| C  | -0.426339000 | -1.989474000 | -0.668628000 |
| C  | 0.604420000  | -3.008145000 | -0.605579000 |
| C  | 1.207845000  | -3.324823000 | 0.615380000  |
| C  | 2.641647000  | -3.548935000 | 0.682477000  |
| C  | 3.126621000  | -2.985537000 | 1.932040000  |
| C  | 4.367481000  | -2.347134000 | 1.975507000  |
| C  | 5.764955000  | 1.188758000  | -0.455396000 |
| C  | 5.426212000  | -0.246900000 | 1.983863000  |
| C  | 3.191595000  | -1.224591000 | -3.266600000 |
| C  | -6.921995000 | -1.699994000 | 0.885262000  |
| C  | -7.190447000 | -1.747788000 | -0.675520000 |
| C  | -7.776581000 | -0.655479000 | 1.616030000  |
| H  | -8.826626000 | -0.963627000 | 1.664846000  |
| H  | -7.405556000 | -0.546969000 | 2.640597000  |
| H  | -7.722002000 | 0.322217000  | 1.131686000  |
| C  | -7.038582000 | -3.046614000 | 1.601160000  |
| H  | -6.804765000 | -2.918105000 | 2.663310000  |
| H  | -8.057483000 | -3.444092000 | 1.525842000  |
| H  | -6.345579000 | -3.785149000 | 1.191485000  |
| C  | -8.603084000 | -1.345065000 | -1.099445000 |
| H  | -9.350061000 | -2.029181000 | -0.679900000 |
| H  | -8.842032000 | -0.327287000 | -0.783011000 |
| H  | -8.682366000 | -1.386193000 | -2.190781000 |
| C  | -6.824217000 | -3.099349000 | -1.310128000 |
| H  | -6.850321000 | -2.995218000 | -2.399296000 |
| H  | -5.814362000 | -3.415328000 | -1.028897000 |
| H  | -7.525499000 | -3.890163000 | -1.021825000 |

$$E_g(\text{B3LYP}/6\text{-}31\text{G}(\text{d})) = -3115.45844$$

$$G_g(\text{B3LYP}/6\text{-}31\text{G}(\text{d})) = -3114.86119$$

$$E_s(\text{M06}/6\text{-}311\text{G}(\text{d},\text{p})//\text{B3LYP}/6\text{-}31\text{G}(\text{d})) =$$

$$G_s(\text{M06}/6\text{-}311\text{G}(\text{d},\text{p})//\text{B3LYP}/6\text{-}31\text{G}(\text{d})) = -3113.41253$$

With Ph-B(O-C<sub>2</sub>(Me)<sub>2</sub>H<sub>4</sub>-O), second structure

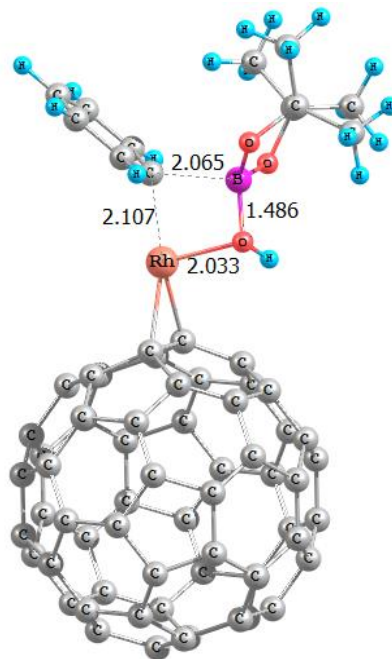

# R

|    |              |              |              |
|----|--------------|--------------|--------------|
| Rh | -3.783302000 | 0.850727000  | -0.272811000 |
| O  | -7.234533000 | 0.454457000  | 1.047756000  |
| H  | -6.533045000 | -0.220213000 | 0.977382000  |
| B  | -7.017800000 | 1.571582000  | 0.324210000  |
| O  | -7.916332000 | 2.596099000  | 0.255718000  |
| H  | -8.712978000 | 2.402092000  | 0.770609000  |
| O  | -5.832467000 | 1.761077000  | -0.413789000 |
| H  | -5.854784000 | 2.612777000  | -0.878307000 |
| C  | -4.560760000 | -0.951450000 | -0.141007000 |
| C  | -5.064504000 | -1.559921000 | -1.305197000 |
| C  | -4.744690000 | -1.599567000 | 1.094779000  |
| C  | -5.738661000 | -2.782433000 | -1.231970000 |
| H  | -4.928070000 | -1.082207000 | -2.272367000 |
| C  | -5.427178000 | -2.823555000 | 1.159216000  |
| H  | -4.343005000 | -1.163430000 | 2.005343000  |
| C  | -5.924468000 | -3.417708000 | -0.000850000 |
| H  | -6.118614000 | -3.239018000 | -2.142950000 |
| H  | -5.560886000 | -3.309461000 | 2.122878000  |
| H  | -6.449608000 | -4.367322000 | 0.051984000  |
| C  | -6.610186000 | 2.370988000  | -1.277413000 |
| C  | 0.649494000  | 2.858388000  | -1.801226000 |
| C  | 1.323764000  | 2.143384000  | -2.796809000 |
| C  | 0.764473000  | 0.902803000  | -3.290423000 |
| C  | -0.443856000 | 0.431187000  | -2.767648000 |
| C  | -1.150637000 | 1.183502000  | -1.755894000 |
| C  | -0.641456000 | 2.669070000  | 0.163398000  |
| C  | 0.599130000  | 3.336581000  | 0.503242000  |
| C  | 1.396442000  | 3.453532000  | -0.705979000 |
| C  | 2.783389000  | 3.313073000  | -0.646745000 |
| C  | 2.766487000  | 1.990748000  | -2.731179000 |
| C  | 1.858422000  | -0.022764000 | -3.536580000 |
| C  | 1.699243000  | -1.380226000 | -3.256623000 |
| C  | 0.439744000  | -1.872669000 | -2.722053000 |
| C  | -0.610842000 | -0.982255000 | -2.476707000 |
| C  | -1.426521000 | -1.106756000 | -1.289228000 |
| C  | -1.879471000 | 0.242860000  | -0.866110000 |
| C  | -1.909925000 | 0.540557000  | 0.579982000  |
| C  | -1.212228000 | 1.765922000  | 1.052214000  |
| C  | 1.224940000  | 3.081596000  | 1.728088000  |
| C  | 0.634754000  | 2.134558000  | 2.650707000  |
| C  | -0.554353000 | 1.483875000  | 2.308140000  |
| C  | -0.720567000 | 0.070019000  | 2.596294000  |
| C  | -1.486552000 | -0.523917000 | 1.523130000  |
| C  | -1.162484000 | -1.798567000 | 1.077094000  |
| C  | -1.132571000 | -2.097208000 | -0.361279000 |
| C  | -0.035881000 | -3.013875000 | -0.597784000 |
| C  | 0.733462000  | -2.913921000 | -1.761217000 |
| C  | 3.098305000  | 0.650977000  | -3.189471000 |
| C  | 4.034927000  | -2.661877000 | -0.123719000 |
| C  | 4.608724000  | -1.750807000 | -1.012728000 |
| C  | 5.172433000  | -0.506669000 | -0.515339000 |
| C  | 5.142809000  | -0.223500000 | 0.851098000  |
| C  | 4.548017000  | -1.172419000 | 1.777862000  |
| C  | 2.744587000  | -2.854464000 | 1.833266000  |
| C  | 1.994681000  | -3.447642000 | 0.737771000  |
| C  | 2.795168000  | -3.332724000 | -0.470698000 |
| C  | 2.176495000  | -3.070614000 | -1.694446000 |
| C  | 2.774483000  | -2.122532000 | -2.620680000 |
| C  | 3.965469000  | -1.475551000 | -2.285669000 |
| C  | 4.876084000  | 0.538110000  | -1.481518000 |
| C  | 4.558030000  | 1.824866000  | -1.042503000 |
| C  | 4.527121000  | 2.120018000  | 0.381984000  |
| C  | 4.814963000  | 1.116458000  | 1.309143000  |
| C  | 4.020168000  | 0.996130000  | 2.519551000  |
| C  | 3.854865000  | -0.419288000 | 2.809026000  |
| C  | 2.645061000  | -0.890176000 | 3.322971000  |
| C  | 2.078130000  | -2.133022000 | 2.825366000  |
| C  | 0.610297000  | -3.288213000 | 0.674612000  |
| C  | -0.085416000 | -2.536875000 | 1.705523000  |
| C  | 0.635357000  | -1.974791000 | 2.763836000  |
| C  | 0.310494000  | -0.640303000 | 3.219481000  |
| C  | 1.550909000  | 0.034672000  | 3.566942000  |
| C  | 1.709803000  | 1.392561000  | 3.289347000  |
| C  | 2.968726000  | 1.883893000  | 2.755455000  |
| C  | 2.668102000  | 2.928295000  | 1.788933000  |
| C  | 3.432242000  | 3.041208000  | 0.625806000  |
| C  | 4.130870000  | -0.060501000 | -2.575767000 |
| C  | 3.482566000  | 2.564135000  | -1.678608000 |
| C  | 4.003780000  | -2.366355000 | 1.300708000  |

$$E_g(\text{B3LYP}/6\text{-}31\text{G}(\text{d})) = -2880.85226$$

$$G_g(\text{B3LYP}/6\text{-}31\text{G}(\text{d})) = -2880.39926$$

$$E_s(\text{M06}/6\text{-}311\text{G}(\text{d},\text{p})//\text{B3LYP}/6\text{-}31\text{G}(\text{d})) = -2879.54568$$

$$G_s(\text{M06}/6\text{-}311\text{G}(\text{d},\text{p})//\text{B3LYP}/6\text{-}31\text{G}(\text{d})) = -2879.09268$$

With Ph-B(OH)<sub>2</sub>

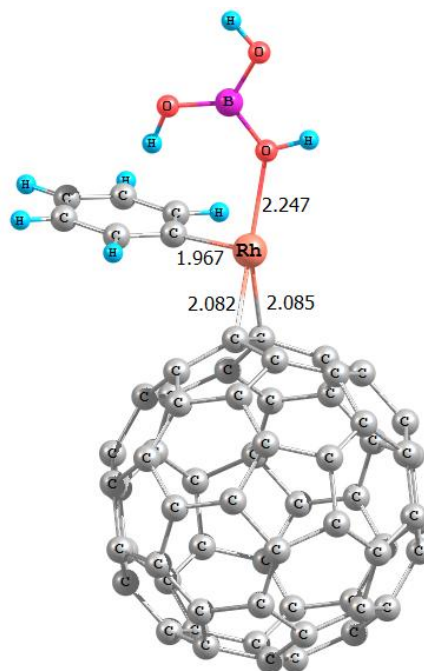



# R

|    |              |               |              |
|----|--------------|---------------|--------------|
| Rh | -3.675845000 | 0.073678000   | -0.556277000 |
| O  | -5.683476000 | -2.767513000  | -0.564616000 |
| B  | -6.308804000 | -1.644228000  | -0.108175000 |
| O  | -7.370344000 | -1.854919000  | 0.724135000  |
| O  | -5.867243000 | -0.390091000  | -0.485311000 |
| H  | -6.342264000 | 0.356045000   | -0.077100000 |
| C  | -4.211231000 | 1.900820000   | -0.068606000 |
| C  | -4.757401000 | 2.150888000   | 1.204204000  |
| C  | -4.227798000 | 2.929554000   | -1.026783000 |
| C  | -5.312753000 | 3.401070000   | 1.506378000  |
| H  | -4.726923000 | 1.380263000   | 1.971847000  |
| C  | -4.785396000 | 4.174366000   | -0.717151000 |
| H  | -3.803505000 | 2.763426000   | -2.013218000 |
| C  | -5.329132000 | 4.414834000   | 0.547406000  |
| H  | -5.723719000 | 3.579382000   | 2.497568000  |
| H  | -4.789804000 | 4.959775000   | -1.469524000 |
| H  | -5.756861000 | 5.385430000   | 0.783703000  |
| C  | -0.920336000 | -2.292283000  | -0.154703000 |
| C  | 0.165019000  | -3.191059000  | 0.180217000  |
| C  | 0.753615000  | -3.145028000  | 1.448760000  |
| C  | 0.281737000  | -2.183716000  | 2.422678000  |
| C  | -0.756672000 | -1.310000000  | 2.085609000  |
| C  | -1.379141000 | -1.375020000  | 0.782860000  |
| C  | -0.756951000 | -1.894535000  | -1.561838000 |
| C  | 0.428476000  | -2.553303000  | -2.071048000 |
| C  | 0.998713000  | -3.352961000  | -0.999333000 |
| C  | 2.383366000  | -3.462631000  | -0.867706000 |
| C  | 2.195412000  | -3.252175000  | 1.585173000  |
| C  | 1.429008000  | -1.693328000  | 3.169594000  |
| C  | 1.488905000  | -0.353856000  | 3.554361000  |
| C  | 0.404151000  | 0.552946000   | 3.213015000  |
| C  | -0.695995000 | 0.084993000   | 2.487171000  |
| C  | -1.288060000 | 0.884779000   | 1.437529000  |
| C  | -1.831756000 | -0.0115293000 | 0.388294000  |
| C  | -1.667745000 | 0.386434000   | -1.025855000 |
| C  | -1.056822000 | -0.596875000  | -1.957895000 |
| C  | 1.272064000  | -1.893226000  | -2.971266000 |
| C  | 0.962691000  | -0.539448000  | -3.379393000 |
| C  | -0.174966000 | 0.094698000   | -2.870491000 |
| C  | -0.114059000 | 1.488727000   | -2.466835000 |
| C  | -0.964005000 | 1.661945000   | -1.309526000 |
| C  | -0.559853000 | 2.512009000   | -0.288215000 |
| C  | -0.724336000 | 2.112861000   | 1.116711000  |
| C  | 0.425865000  | 2.599655000   | 1.851658000  |
| C  | 0.977871000  | 1.840784000   | 2.888799000  |
| C  | 2.614116000  | -2.354596000  | 2.649833000  |
| C  | 4.442700000  | 1.747548000   | 1.612564000  |
| C  | 4.746772000  | 0.443528000   | 2.008382000  |
| C  | 5.222370000  | -0.520518000  | 1.029997000  |
| C  | 5.379289000  | -0.142497000  | -0.304366000 |
| C  | 5.067180000  | 1.212609000   | -0.716991000 |
| C  | 3.521839000  | 3.044668000   | -0.120173000 |
| C  | 2.684226000  | 3.204632000   | 1.058056000  |
| C  | 3.257492000  | 2.406584000   | 2.130399000  |
| C  | 2.420659000  | 1.738526000   | 3.026388000  |
| C  | 2.737331000  | 0.380852000   | 3.438844000  |
| C  | 3.876624000  | -0.253496000  | 2.939922000  |
| C  | 4.644874000  | -1.813752000  | 1.356690000  |
| C  | 4.242903000  | -2.676401000  | 0.334820000  |
| C  | 4.406401000  | -2.282388000  | -1.056246000 |
| C  | 4.965142000  | -1.041460000  | -1.369036000 |
| C  | 4.397680000  | -0.238889000  | -2.439105000 |
| C  | 4.460502000  | 1.156678000   | -2.035587000 |
| C  | 3.418535000  | 2.025726000   | -2.364703000 |
| C  | 2.938658000  | 2.989223000   | -1.387436000 |
| C  | 1.298885000  | 3.294429000   | 0.920890000  |
| C  | 0.689548000  | 3.237311000   | -0.397414000 |
| C  | 1.496781000  | 3.093815000   | -1.530558000 |
| C  | 1.085432000  | 2.197847000   | -2.589086000 |
| C  | 2.270955000  | 1.535190000   | -3.109320000 |
| C  | 2.211168000  | 0.196394000   | -3.496674000 |
| C  | 3.295430000  | -0.708884000  | -3.155273000 |
| C  | 2.713516000  | -2.001055000  | -2.829153000 |
| C  | 3.259131000  | -2.770731000  | -1.799639000 |
| C  | 3.813691000  | -1.649338000  | 2.536970000  |
| C  | 2.994764000  | -3.408078000  | 0.450904000  |
| C  | 4.605921000  | 2.141938000   | 0.221426000  |
| C  | -7.560285000 | -3.282364000  | 0.793721000  |
| H  | -7.645958000 | -3.579859000  | 1.842043000  |
| H  | -8.492241000 | -3.534900000  | 0.277057000  |
| C  | -6.310872000 | -3.884506000  | 0.093070000  |
| H  | -6.565046000 | -4.641685000  | -0.653198000 |
| H  | -5.599167000 | -4.314701000  | 0.805157000  |

$$E_g(\text{B3LYP}/6\text{-}31\text{G}(\text{d})) = -2958.25162$$

$$G_g(\text{B3LYP}/6\text{-}31\text{G}(\text{d})) = -2957.76665$$

$$E_s(\text{M06}/6\text{-}311\text{G}(\text{d,p})//\text{B3LYP}/6\text{-}31\text{G}(\text{d})) = -2956.88292$$

$$G_s(\text{M06}/6\text{-}311\text{G}(\text{d,p})//\text{B3LYP}/6\text{-}31\text{G}(\text{d})) = -2956.39795$$

With Ph-B(O-C<sub>2</sub>H<sub>4</sub>-O)

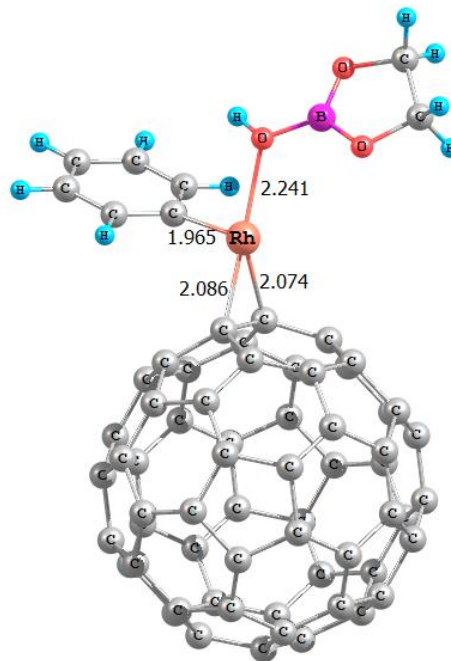

# R

|    |               |               |              |
|----|---------------|---------------|--------------|
| Rh | -3.123821000  | -0.796126000  | 0.256036000  |
| O  | -5.630285000  | 1.597955000   | 0.156557000  |
| B  | -6.160564000  | 0.343820000   | 0.142313000  |
| O  | -7.510966000  | 0.271626000   | -0.023260000 |
| O  | -5.343536000  | -0.763775000  | 0.294726000  |
| H  | -5.768024000  | -1.629297000  | 0.171636000  |
| C  | -3.284597000  | -2.745998000  | 0.053530000  |
| C  | -3.545191000  | -3.305222000  | -1.210293000 |
| C  | -3.299659000  | -3.584540000  | 1.182060000  |
| C  | -3.815588000  | -4.672745000  | -1.338659000 |
| H  | -3.523748000  | -2.678182000  | -2.098416000 |
| C  | -3.571333000  | -4.950574000  | 1.045370000  |
| H  | -3.089342000  | -3.176575000  | 2.167423000  |
| C  | -3.828673000  | -5.499042000  | -0.213111000 |
| H  | -4.009292000  | -5.090070000  | -2.324349000 |
| H  | -3.575354000  | -5.586100000  | 1.928124000  |
| H  | -4.034320000  | -6.561216000  | -0.315889000 |
| C  | -0.760810000  | 1.930754000   | -0.367721000 |
| C  | 0.191686000   | 2.942000000   | -0.778046000 |
| C  | 0.888430000   | 2.808244000   | -1.984100000 |
| C  | 0.664136000   | 1.643774000   | -2.814551000 |
| C  | -0.245064000  | 0.664600000   | -2.402097000 |
| C  | -0.981177000  | 0.816585000   | -1.167673000 |
| C  | -0.658178000  | 1.783252000   | 1.092453000  |
| C  | 0.356525000   | 2.705845000   | 1.558833000  |
| C  | 0.882281000   | 3.421174000   | 0.407778000  |
| C  | 2.237550000   | 3.747127000   | 0.345069000  |
| C  | 2.301122000   | 3.139755000   | -2.047072000 |
| C  | 1.936547000   | 1.250569000   | -3.398378000 |
| C  | 2.244415000   | -0.1100979000 | -3.555407000 |
| C  | 1.293859000   | -1.119318000  | -3.137630000 |
| C  | 0.073750000   | -0.743187000  | -2.566046000 |
| C  | -0.470941000  | -1.454613000  | -1.437258000 |
| C  | -1.243605000  | -0.525145000  | -0.585413000 |
| C  | -1.141307000  | -0.674164000  | 0.882074000  |
| C  | -0.781461000  | 0.528815000   | 1.677467000  |
| C  | 1.212368000   | 2.344562000   | 2.605909000  |
| C  | 1.089344000   | 1.035180000   | 3.210082000  |
| C  | 0.111387000   | 0.144875000   | 2.742295000  |
| C  | 0.437023000   | -1.262253000  | 2.575887000  |
| C  | -0.269731000  | -1.752251000  | 1.413416000  |
| C  | 0.353536000   | -2.663885000  | 0.571094000  |
| C  | 0.250836000   | -2.516178000  | -0.887710000 |
| C  | 1.524130000   | -2.902126000  | -1.461266000 |
| C  | 2.036132000   | -2.225120000  | -2.572742000 |
| C  | 2.949955000   | 2.176989000   | -2.922835000 |
| C  | 5.314759000   | -1.344069000  | -1.119391000 |
| C  | 5.439891000   | -0.082244000  | -1.704134000 |
| C  | 5.667275000   | 1.085946000   | -0.869232000 |
| C  | 5.764628000   | 0.945928000   | 0.516087000  |
| C  | 5.639303000   | -0.368011000  | 1.125137000  |
| C  | 4.466224000   | -2.504391000  | 0.742381000  |
| C  | 3.771838000   | -2.982398000  | -0.442801000 |
| C  | 4.301121000   | -2.268290000  | -1.594015000 |
| C  | 3.450103000   | -1.897528000  | -2.636853000 |
| C  | 3.579911000   | -0.583541000  | -3.246164000 |
| C  | 4.554079000   | 0.305966000   | -2.788149000 |
| C  | 4.920227000   | 2.195892000   | -1.437519000 |
| C  | 4.297160000   | 3.120527000   | -0.596742000 |
| C  | 4.399043000   | 2.974638000   | 0.847528000  |
| C  | 5.119803000   | 1.909890000   | 1.392327000  |
| C  | 4.597602000   | 1.192584000   | 2.542966000  |
| C  | 4.918459000   | -0.215878000  | 2.377235000  |
| C  | 4.005365000   | -1.192251000  | 2.780436000  |
| C  | 3.773656000   | -2.360560000  | 1.946116000  |
| C  | 2.412234000   | -3.288234000  | -0.377815000 |
| C  | 1.688741000   | -3.138245000  | 0.873629000  |
| C  | 2.359949000   | -2.688808000  | 2.015455000  |
| C  | 1.719141000   | -1.727406000  | 2.885960000  |
| C  | 2.732728000   | -0.799472000  | 3.361938000  |
| C  | 2.424980000   | 0.551795000   | 3.521491000  |
| C  | 3.375509000   | 1.568479000   | 3.103942000  |
| C  | 2.624567000   | 2.676614000   | 2.535542000  |
| C  | 3.127645000   | 3.364216000   | 1.429383000  |
| C  | 4.232520000   | 1.714354000   | -2.623268000 |
| C  | 2.962748000   | 3.600268000   | -0.906879000 |
| C  | 5.416828000   | -1.490056000  | 0.324584000  |
| C  | -7.946015000  | 1.629875000   | -0.367917000 |
| C  | -8.051427000  | 1.676144000   | -1.896588000 |
| H  | -8.435380000  | 2.640874000   | -2.243133000 |
| H  | -7.080863000  | 1.499784000   | -2.371566000 |
| H  | -8.739604000  | 0.893145000   | -2.229451000 |
| C  | -9.311883000  | 1.869870000   | 0.268597000  |
| H  | -9.293896000  | 1.695282000   | 1.346586000  |
| H  | -9.648140000  | 2.896515000   | 0.085245000  |
| H  | -10.047131000 | 1.189760000   | -0.172858000 |
| C  | -6.768031000  | 2.518317000   | 0.210695000  |
| C  | -6.424147000  | 3.754495000   | -0.615056000 |
| H  | -7.273888000  | 4.445641000   | -0.649979000 |
| H  | -5.580582000  | 4.278450000   | -0.155034000 |
| H  | -6.142231000  | 3.493769000   | -1.637404000 |
| C  | -6.955777000  | 2.894170000   | 1.685033000  |
| H  | -6.026278000  | 3.332365000   | 2.060893000  |
| H  | -7.758516000  | 3.627403000   | 1.813088000  |
| H  | -7.187593000  | 2.016515000   | 2.297175000  |

$$E_g(\text{B3LYP}/6\text{-}31\text{G}(\text{d})) = -3115.52224$$

$$G_g(\text{B3LYP}/6\text{-}31\text{G}(\text{d})) = -3114.93034$$

$$E_s(\text{M06}/6\text{-}311\text{G}(\text{d},\text{p})//\text{B3LYP}/6\text{-}31\text{G}(\text{d})) = -3114.07303$$

$$G_s(\text{M06}/6\text{-}311\text{G}(\text{d},\text{p})//\text{B3LYP}/6\text{-}31\text{G}(\text{d})) =$$

With Ph-B(O-C<sub>2</sub>(Me)<sub>2</sub>H<sub>4</sub>-O)

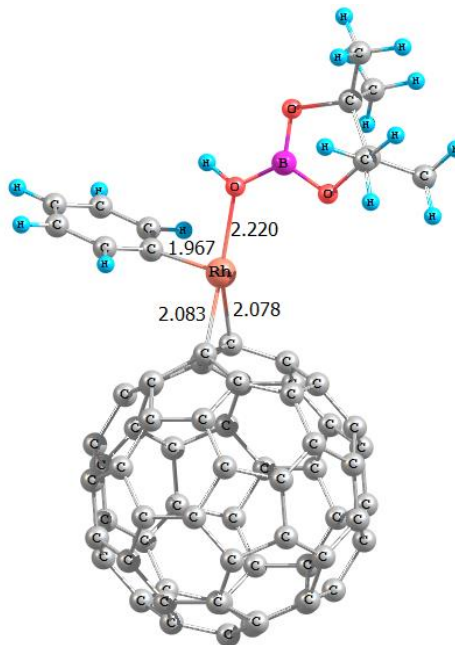

**S**

|    |              |              |              |
|----|--------------|--------------|--------------|
| Rh | -4.098977000 | -1.479571000 | 0.000158000  |
| C  | -5.214644000 | 0.102770000  | -0.000037000 |
| C  | -5.725191000 | 0.589107000  | 1.216742000  |
| C  | -5.725662000 | 0.588456000  | -1.216870000 |
| C  | -6.777585000 | 1.510018000  | 1.209411000  |
| H  | -5.304056000 | 0.256971000  | 2.162357000  |
| C  | -6.778056000 | 1.509373000  | -1.209621000 |
| H  | -5.304898000 | 0.255822000  | -2.162476000 |
| C  | -7.304657000 | 1.969672000  | -0.000128000 |
| H  | -7.175505000 | 1.877222000  | 2.152324000  |
| H  | -7.176336000 | 1.876067000  | -2.152580000 |
| H  | -8.114195000 | 2.694486000  | -0.000162000 |
| C  | -0.720985000 | -2.804433000 | 0.735822000  |
| C  | 0.596696000  | -3.214773000 | 1.177137000  |
| C  | 1.173341000  | -2.633121000 | 2.311010000  |
| C  | 0.452616000  | -1.607606000 | 3.035439000  |
| C  | -0.812689000 | -1.208440000 | 2.594856000  |
| C  | -1.417883000 | -1.828182000 | 1.437482000  |
| C  | -0.721019000 | -2.804500000 | -0.735509000 |
| C  | 0.596641000  | -3.214874000 | -1.176852000 |
| C  | 1.410694000  | -3.467560000 | 0.000135000  |
| C  | 2.764551000  | -3.131258000 | 0.000088000  |
| C  | 2.581320000  | -2.276613000 | 2.308711000  |
| C  | 1.411487000  | -0.612050000 | 3.486686000  |
| C  | 1.066062000  | 0.739350000  | 3.485840000  |
| C  | -0.252947000 | 1.154556000  | 3.036020000  |
| C  | -1.173356000 | 0.198930000  | 2.594130000  |
| C  | -2.006136000 | 0.452225000  | 1.439710000  |
| C  | -2.274019000 | -0.831070000 | 0.742775000  |
| C  | -2.274044000 | -0.831134000 | -0.742553000 |
| C  | -1.417946000 | -1.828304000 | -1.437217000 |
| C  | 1.173234000  | -2.633210000 | -2.310801000 |
| C  | 0.452475000  | -1.607863000 | -3.035281000 |
| C  | -0.812811000 | -1.208662000 | -2.594676000 |
| C  | -1.173476000 | 0.198709000  | -2.594049000 |
| C  | -2.006204000 | 0.452104000  | -1.439613000 |
| C  | -1.856133000 | 1.639269000  | -0.735028000 |
| C  | -1.856101000 | 1.639333000  | 0.735021000  |
| C  | -0.895097000 | 2.629975000  | 1.176351000  |
| C  | -0.111164000 | 2.398887000  | 2.311022000  |
| C  | 2.729539000  | -1.026603000 | 3.036591000  |
| C  | 3.181563000  | 2.937721000  | 0.727490000  |
| C  | 3.881243000  | 1.951207000  | 1.425284000  |
| C  | 4.606485000  | 0.922604000  | 0.697695000  |
| C  | 4.606451000  | 0.922544000  | -0.697948000 |
| C  | 3.881175000  | 1.951089000  | -1.425590000 |
| C  | 1.863886000  | 3.348630000  | -1.177147000 |
| C  | 1.047005000  | 3.598339000  | -0.000154000 |
| C  | 1.863944000  | 3.348728000  | 1.176824000  |
| C  | 1.295811000  | 2.761030000  | 2.308713000  |
| C  | 2.024594000  | 1.734755000  | 3.035951000  |
| C  | 3.290627000  | 1.337313000  | 2.601866000  |
| C  | 4.462433000  | -0.327572000 | 1.425050000  |
| C  | 4.321531000  | -1.528833000 | 0.727592000  |
| C  | 4.321499000  | -1.528896000 | -0.727625000 |
| C  | 4.462362000  | -0.327692000 | -1.425190000 |
| C  | 3.650324000  | -0.071680000 | -2.602381000 |
| C  | 3.290502000  | 1.337093000  | -2.602088000 |
| C  | 2.024450000  | 1.734500000  | -3.036151000 |
| C  | 1.295703000  | 2.760832000  | -2.308959000 |
| C  | -0.301492000 | 3.242320000  | -0.000107000 |
| C  | -0.895151000 | 2.629876000  | -1.176486000 |
| C  | -0.111272000 | 2.398690000  | -2.311172000 |
| C  | -0.253092000 | 1.154300000  | -3.036065000 |
| C  | 1.065897000  | 0.739055000  | -3.485906000 |
| C  | 1.411323000  | -0.612346000 | -3.486661000 |
| C  | 2.729394000  | -1.026859000 | -3.036588000 |
| C  | 2.581212000  | -2.276811000 | -2.308600000 |
| C  | 3.361771000  | -2.520965000 | -1.176922000 |
| C  | 3.650446000  | -0.071461000 | 2.602257000  |
| C  | 3.361826000  | -2.520864000 | 1.177018000  |
| C  | 3.181528000  | 2.937658000  | -0.727842000 |

 $E_g(\text{B3LYP}/6\text{-}31\text{G}(\text{d})) = -2628.35041$  $G_g(\text{B3LYP}/6\text{-}31\text{G}(\text{d})) = -2627.94061$  $E_s(\text{M06}/6\text{-}311\text{G}(\text{d},\text{p})//\text{B3LYP}/6\text{-}31\text{G}(\text{d})) = -2627.05970$  $G_s(\text{M06}/6\text{-}311\text{G}(\text{d},\text{p})//\text{B3LYP}/6\text{-}31\text{G}(\text{d})) = -2626.64990$ 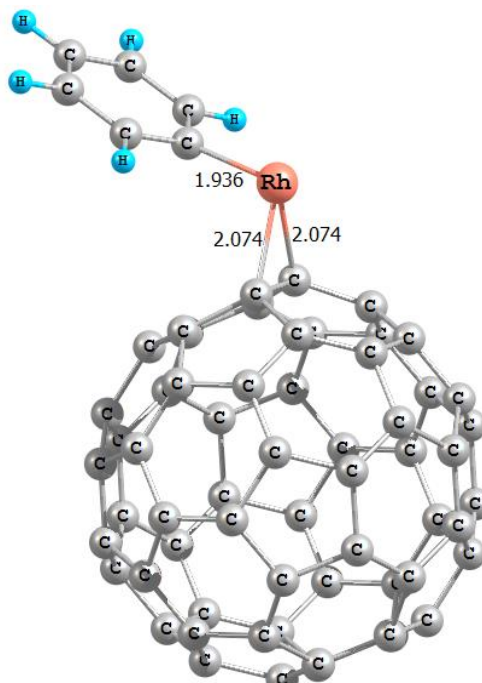

**T**

|    |              |              |              |
|----|--------------|--------------|--------------|
| Rh | -0.000019000 | 1.347420000  | -0.845958000 |
| C  | 2.163630000  | 1.238763000  | -0.998754000 |
| C  | 2.682127000  | 0.544732000  | -2.199681000 |
| C  | 1.725104000  | 0.431856000  | 0.135052000  |
| C  | 3.110235000  | 2.345573000  | -0.744624000 |
| C  | 2.670629000  | -0.842698000 | -2.297374000 |
| C  | 3.803506000  | 1.292589000  | -2.726122000 |
| C  | 1.818262000  | -1.041149000 | 0.022708000  |
| C  | 2.241736000  | 0.759496000  | 1.478539000  |
| C  | 4.067689000  | 2.402263000  | -1.827114000 |
| C  | 3.510147000  | 2.673322000  | 0.545248000  |
| C  | 2.232611000  | -1.651954000 | -1.155883000 |
| C  | 3.772623000  | -1.535933000 | -2.934283000 |
| C  | 4.863959000  | 0.630555000  | -3.352479000 |
| C  | 2.236950000  | -1.582641000 | 1.297560000  |
| C  | 2.501708000  | -0.471330000 | 2.194545000  |
| C  | 3.070418000  | 1.857617000  | 1.678833000  |
| C  | 5.384259000  | 2.810180000  | -1.590053000 |
| C  | 4.876003000  | 3.085195000  | 0.800562000  |
| C  | 3.063084000  | -2.839454000 | -1.107454000 |
| C  | 4.015747000  | -2.768116000 | -2.202296000 |
| C  | 4.848724000  | -0.814299000 | -3.459390000 |
| C  | 6.232044000  | 1.051347000  | -3.099871000 |
| C  | 3.031415000  | -2.730963000 | 1.352622000  |
| C  | 3.550956000  | -0.552038000 | 3.114349000  |
| C  | 4.166697000  | 1.780559000  | 2.625009000  |
| C  | 5.797611000  | 3.160465000  | -0.247277000 |
| C  | 6.486339000  | 2.117971000  | -2.236968000 |
| C  | 5.282892000  | 2.536998000  | 2.084156000  |
| C  | 3.454222000  | -3.372464000 | 0.123883000  |
| C  | 5.319724000  | -3.231324000 | -2.025171000 |
| C  | 6.207172000  | -1.293558000 | -3.269816000 |
| C  | 7.063713000  | -0.139601000 | -3.048639000 |
| C  | 4.1271165000 | -2.811357000 | 2.304713000  |
| C  | 4.402447000  | 0.599712000  | 3.333806000  |
| C  | 4.381837000  | -1.743956000 | 3.166050000  |
| C  | 7.156732000  | 2.683760000  | -0.055950000 |
| C  | 7.584079000  | 2.039839000  | -1.287223000 |
| C  | 6.589356000  | 2.080553000  | 2.269996000  |
| C  | 4.812794000  | -3.850883000 | 0.310365000  |
| C  | 5.727514000  | -3.781462000 | -0.742065000 |
| C  | 6.438693000  | -2.477856000 | -2.567821000 |
| C  | 8.115779000  | -0.216472000 | -2.134590000 |
| C  | 5.229732000  | -3.503498000 | 1.658825000  |
| C  | 5.762574000  | 0.125172000  | 3.523788000  |
| C  | 5.750306000  | -1.324677000 | 3.419717000  |
| C  | 7.546010000  | 2.157783000  | 1.177149000  |
| C  | 8.381877000  | 0.895638000  | -1.236279000 |
| C  | 6.833919000  | 0.852171000  | 3.001568000  |
| C  | 7.095373000  | -3.364719000 | -0.490180000 |
| C  | 7.534203000  | -2.557849000 | -1.618152000 |
| C  | 8.356340000  | -1.449788000 | -1.405246000 |
| C  | 6.544178000  | -3.101170000 | 1.901077000  |
| C  | 6.809698000  | -1.989069000 | 2.799425000  |
| C  | 8.376131000  | 0.967586000  | 1.229854000  |
| C  | 7.786843000  | 0.348766000  | 0.047554000  |
| C  | 7.936842000  | 0.161130000  | 2.358109000  |
| C  | 7.495242000  | -3.029436000 | 0.804929000  |
| C  | 8.770620000  | -1.100927000 | -0.056495000 |
| C  | 7.925362000  | -1.231475000 | 2.258319000  |
| C  | 8.350005000  | -1.875047000 | 1.026026000  |
| C  | -1.725104000 | 0.431990000  | 0.135132000  |
| C  | -1.818208000 | -1.041055000 | 0.023138000  |
| C  | -2.163594000 | 1.238598000  | -0.998929000 |
| C  | -2.241868000 | 0.759950000  | 1.478485000  |
| C  | -2.232465000 | -1.652174000 | -1.155322000 |
| C  | -2.236983000 | -1.582230000 | 1.298093000  |
| C  | -2.681979000 | 0.544234000  | -2.199704000 |
| C  | -3.110246000 | 2.345438000  | -0.745156000 |
| C  | -2.501848000 | -0.470696000 | 2.194781000  |
| C  | -3.070589000 | 1.858108000  | 1.678443000  |
| C  | -2.670428000 | -0.843219000 | -2.297047000 |
| C  | -3.062882000 | -2.839704000 | -1.106655000 |
| C  | -3.031407000 | -2.730569000 | 1.353401000  |
| C  | -3.803377000 | 1.291924000  | -2.726437000 |
| C  | -4.067634000 | 2.401820000  | -1.827730000 |
| C  | -3.510282000 | 2.673476000  | 0.544608000  |
| C  | -3.551161000 | -0.551197000 | 3.114521000  |
| C  | -4.166939000 | 1.781262000  | 2.624564000  |
| C  | -3.772354000 | -1.536658000 | -2.933860000 |
| C  | -4.015480000 | -2.768674000 | -2.201588000 |
| C  | -3.454106000 | -3.372393000 | 0.124799000  |
| C  | -4.127234000 | -2.810734000 | 2.305426000  |
| C  | -4.863730000 | 0.629683000  | -3.352691000 |
| C  | -5.384236000 | 2.809736000  | -1.590865000 |
| C  | -4.876162000 | 3.085382000  | 0.799718000  |
| C  | -4.402702000 | 0.600581000  | 3.333640000  |
| C  | -4.382003000 | -1.743130000 | 3.166470000  |
| C  | -5.283129000 | 2.537517000  | 2.083431000  |
| C  | -4.848444000 | -0.815194000 | -3.459228000 |
| C  | -5.319451000 | -3.231879000 | -2.024435000 |
| C  | -4.812679000 | -3.850807000 | 0.311306000  |
| C  | -5.229722000 | -3.503088000 | 1.659643000  |
| C  | -6.231849000 | 1.050482000  | -3.100280000 |
| C  | -5.797693000 | 3.160349000  | -0.248208000 |
| C  | -6.486236000 | 2.117310000  | -2.237671000 |
| C  | -5.762821000 | 0.126031000  | 3.523633000  |
| C  | -5.750502000 | -1.323839000 | 3.419937000  |
| C  | -6.589587000 | 2.085575000  | 2.269295000  |
| C  | -6.206881000 | -1.294462000 | -3.269640000 |
| C  | -6.338415000 | -2.478597000 | -2.567857000 |
| C  | -5.727321000 | -3.781688000 | -0.741210000 |
| C  | -6.544202000 | -3.100752000 | 1.901699000  |
| C  | -7.063477000 | -0.140479000 | -3.048801000 |
| C  | -7.156812000 | 2.683652000  | -0.056852000 |
| C  | -7.584051000 | 2.039403000  | -1.287991000 |
| C  | -6.834155000 | 0.852863000  | 3.001157000  |
| C  | -6.809837000 | -1.988433000 | 2.799751000  |
| C  | -7.546177000 | 2.157999000  | 1.176359000  |
| C  | -7.533995000 | -2.558369000 | -1.617747000 |
| C  | -7.095204000 | -3.364919000 | -0.489536000 |
| C  | -7.495174000 | -3.029316000 | 0.805459000  |
| C  | -8.115603000 | -0.217147000 | -2.134816000 |
| C  | -8.381805000 | 0.895185000  | -1.236806000 |
| C  | -7.937013000 | 0.161619000  | 2.357797000  |
| C  | -7.925465000 | -1.231008000 | 2.258349000  |
| C  | -8.376251000 | 0.967770000  | 1.229305000  |

$$E_g(\text{B3LYP}/6\text{-}31\text{G}(\text{d})) = -4914.51647$$

$$G_g(\text{B3LYP}/6\text{-}31\text{G}(\text{d})) = -4913.75189$$

$$E_s(\text{M06}/6\text{-}311\text{G}(\text{d,p})//\text{B3LYP}/6\text{-}31\text{G}(\text{d})) = -4912.08742$$

$$G_s(\text{M06}/6\text{-}311\text{G}(\text{d,p})//\text{B3LYP}/6\text{-}31\text{G}(\text{d})) = -4911.32284$$

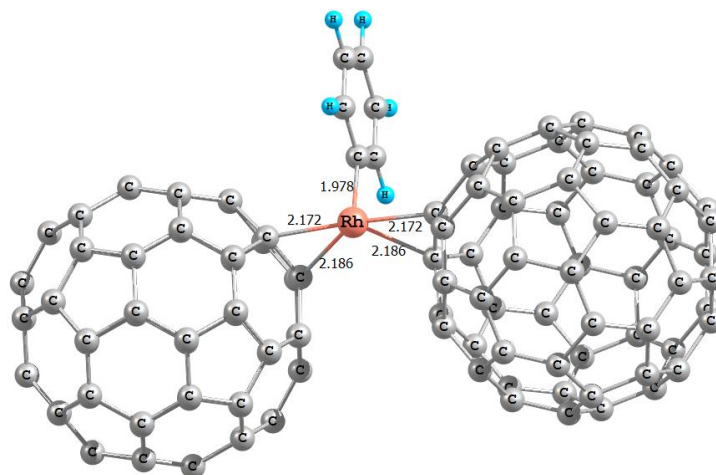

|   |              |              |              |
|---|--------------|--------------|--------------|
| C | -8.356190000 | -1.450284000 | -1.405181000 |
| C | -8.350004000 | -1.874914000 | 1.026202000  |
| C | -8.786868000 | 0.348635000  | 0.047133000  |
| C | -8.770577000 | -1.101086000 | -0.056548000 |
| C | -0.000079000 | 3.167467000  | -0.071301000 |
| C | -0.000411000 | 4.201785000  | -1.018296000 |
| C | 0.000191000  | 3.470635000  | 1.291547000  |
| C | -0.000439000 | 5.535246000  | -0.595808000 |
| H | -0.000639000 | 3.982468000  | -2.085150000 |
| C | 0.000139000  | 4.809221000  | 1.704817000  |
| H | 0.000443000  | 2.679110000  | 2.033505000  |
| C | -0.000172000 | 5.841972000  | 0.767100000  |
| H | -0.000680000 | 6.330499000  | -1.337274000 |
| H | 0.000339000  | 5.037003000  | 2.768182000  |
| H | -0.000221000 | 6.878192000  | 1.093754000  |

# T-U

|    |              |              |              |
|----|--------------|--------------|--------------|
| Rh | 0.083837000  | 2.063135000  | -0.049263000 |
| C  | 1.824632000  | 1.013317000  | -0.772234000 |
| C  | 1.885012000  | -0.290728000 | -1.465147000 |
| C  | 1.810723000  | 1.023224000  | 0.687084000  |
| C  | 2.803785000  | 1.876264000  | -1.471557000 |
| C  | 1.848728000  | -1.485292000 | -0.754381000 |
| C  | 2.753552000  | -0.171911000 | -2.616672000 |
| C  | 1.858862000  | -0.267981000 | 1.403419000  |
| C  | 2.774961000  | 1.900690000  | 1.391204000  |
| C  | 3.317394000  | 1.166773000  | -2.622917000 |
| C  | 3.629698000  | 2.750133000  | -0.773674000 |
| C  | 1.835365000  | -1.473359000 | 0.711981000  |
| C  | 2.656640000  | -2.611222000 | -1.179951000 |
| C  | 3.527910000  | -1.256523000 | -3.039495000 |
| C  | 2.703365000  | -0.128591000 | 2.569669000  |
| C  | 3.266331000  | 1.210636000  | 2.564249000  |
| C  | 3.615307000  | 2.761441000  | 0.693903000  |
| C  | 4.632432000  | 1.371556000  | -3.051570000 |
| C  | 4.997218000  | 2.958129000  | -1.204964000 |
| C  | 2.633829000  | -2.591907000 | 1.172764000  |
| C  | 3.141521000  | -3.295488000 | 0.007142000  |
| C  | 3.477401000  | -2.504621000 | -2.306550000 |
| C  | 4.897606000  | -1.044437000 | -3.478410000 |
| C  | 3.468619000  | -1.205597000 | 3.026514000  |
| C  | 4.572424000  | 1.422887000  | 3.015225000  |
| C  | 4.974113000  | 2.977825000  | 1.148954000  |
| C  | 5.490976000  | 2.286270000  | -2.327342000 |
| C  | 5.438209000  | 0.241643000  | -3.484957000 |
| C  | 5.828488000  | 3.098545000  | -0.020754000 |
| C  | 3.432232000  | -2.465752000 | 2.313455000  |
| C  | 4.424610000  | -3.842927000 | 0.024541000  |
| C  | 4.816320000  | -3.068707000 | -2.286212000 |
| C  | 5.695218000  | -2.166626000 | -3.012512000 |
| C  | 4.829380000  | -0.985658000 | 3.488739000  |
| C  | 5.445247000  | 2.325131000  | 2.292131000  |
| C  | 5.369627000  | 0.300580000  | 3.483561000  |
| C  | 6.831021000  | 1.725592000  | -2.307500000 |
| C  | 6.798647000  | 0.460524000  | -3.023602000 |
| C  | 7.117289000  | 2.564675000  | -0.003465000 |
| C  | 4.771167000  | -3.029698000 | 2.329208000  |
| C  | 5.257655000  | -3.704745000 | 1.208430000  |
| C  | 5.280718000  | -3.724645000 | -1.144884000 |
| C  | 7.002211000  | -1.957003000 | -2.568851000 |
| C  | 5.635758000  | -2.115324000 | 3.057469000  |
| C  | 6.785334000  | 1.764626000  | 2.308610000  |
| C  | 6.738811000  | 0.511907000  | 3.045359000  |
| C  | 7.628277000  | 1.861514000  | -1.169360000 |
| C  | 7.564939000  | -0.616193000 | -2.574324000 |
| C  | 7.604675000  | 1.881219000  | 1.184075000  |
| C  | 6.626027000  | -3.494814000 | 0.770603000  |
| C  | 6.640260000  | -3.507130000 | -0.683909000 |
| C  | 7.484669000  | -2.641187000 | -1.381157000 |
| C  | 6.951274000  | -1.912975000 | 2.636085000  |
| C  | 7.513848000  | -0.572122000 | 2.629750000  |
| C  | 8.425523000  | 0.741621000  | -0.702359000 |
| C  | 8.394975000  | -0.472914000 | -1.390412000 |
| C  | 8.411083000  | 0.753859000  | 0.752123000  |
| C  | 7.456626000  | -2.617036000 | 1.469572000  |
| C  | 8.345702000  | -1.724229000 | -0.652804000 |
| C  | 8.366843000  | -0.448820000 | 1.459915000  |
| C  | 8.332057000  | -1.712502000 | 0.742912000  |
| C  | -1.533256000 | 0.785924000  | -0.086858000 |
| C  | -1.756124000 | -0.040152000 | -1.310468000 |
| C  | -2.294450000 | 2.073790000  | 0.030852000  |
| C  | -1.648048000 | -0.191345000 | 1.033598000  |
| C  | -2.541144000 | 0.393976000  | -2.366683000 |
| C  | -1.765808000 | -1.438320000 | -0.948005000 |
| C  | -3.248280000 | 2.392784000  | -1.082575000 |
| C  | -3.128814000 | 2.248035000  | 1.267019000  |
| C  | -1.697186000 | -1.531262000 | 0.498917000  |
| C  | -2.318875000 | 0.100814000  | 2.209490000  |
| C  | -3.310199000 | 1.641224000  | -2.242183000 |
| C  | -3.350036000 | -0.547372000 | -3.111918000 |
| C  | -2.527555000 | -2.361006000 | -1.671960000 |
| C  | -4.455172000 | 2.959055000  | -0.533153000 |
| C  | -4.383225000 | 2.867838000  | 0.913644000  |
| C  | -3.086255000 | 1.350499000  | 2.320070000  |
| C  | -2.389800000 | -2.543387000 | 1.170593000  |
| C  | -3.056011000 | -0.932914000 | 2.904010000  |
| C  | -4.575895000 | 1.452690000  | -2.920688000 |
| C  | -4.603909000 | 0.102649000  | -3.455539000 |
| C  | -3.339622000 | -1.905861000 | -2.779337000 |
| C  | -3.258864000 | -3.405142000 | -0.972213000 |
| C  | -5.681489000 | 2.796147000  | -1.185274000 |
| C  | -5.541823000 | 2.614446000  | 1.654958000  |
| C  | -4.281516000 | 1.067714000  | 3.088373000  |
| C  | -3.086247000 | -2.238389000 | 2.401308000  |
| C  | -3.190834000 | -3.495073000 | 0.418080000  |
| C  | -4.266272000 | -0.339918000 | 3.447581000  |
| C  | -5.743459000 | 2.024668000  | -2.406942000 |
| C  | -5.794246000 | -0.624682000 | -3.455161000 |
| C  | -4.579454000 | -2.661348000 | -2.768992000 |
| C  | -4.529678000 | -3.590622000 | -1.651696000 |
| C  | -6.883455000 | 2.521609000  | -0.414154000 |
| C  | -5.489868000 | 1.693132000  | 2.768162000  |
| C  | -6.814737000 | 2.432319000  | 0.975533000  |
| C  | -4.325891000 | -2.994133000 | 2.415005000  |
| C  | -4.390705000 | -3.773711000 | 1.188967000  |
| C  | -5.455235000 | -1.068940000 | 3.469532000  |
| C  | -6.981820000 | 1.266066000  | -2.399250000 |
| C  | -7.006453000 | -0.032882000 | -2.911506000 |
| C  | -5.782905000 | -2.034930000 | -3.100458000 |
| C  | -5.683663000 | -3.856364000 | -0.912171000 |
| C  | -7.687572000 | 1.573151000  | -1.165728000 |
| C  | -6.727785000 | 0.933616000  | 2.783957000  |
| C  | -7.548480000 | 1.391158000  | 1.674709000  |
| C  | -5.487445000 | -2.422756000 | 2.939347000  |
| C  | -5.612869000 | -3.949342000 | 0.537259000  |
| C  | -6.710777000 | -0.419856000 | 3.125778000  |
| C  | -7.739252000 | -1.074416000 | -2.215758000 |
| C  | -6.982283000 | -2.312085000 | -2.332183000 |
| C  | -6.934793000 | -3.204582000 | -1.259348000 |
| C  | -8.390978000 | 0.570496000  | -0.495578000 |
| C  | -8.319771000 | 0.477432000  | 0.953704000  |
| C  | -6.757293000 | -2.606355000 | 2.261748000  |
| C  | -6.820029000 | -3.354522000 | 1.084509000  |
| C  | -7.514514000 | -1.369059000 | 2.378484000  |

$$E_g(\text{B3LYP}/6\text{-}31\text{G}(\text{d})) = -4914.47803$$

$$G_g(\text{B3LYP}/6\text{-}31\text{G}(\text{d})) = -4913.71252$$

$$E_s(\text{M06}/6\text{-}311\text{G}(\text{d,p})//\text{B3LYP}/6\text{-}31\text{G}(\text{d})) = -4912.05336$$

$$G_s(\text{M06}/6\text{-}311\text{G}(\text{d,p})//\text{B3LYP}/6\text{-}31\text{G}(\text{d})) = -4911.28785$$

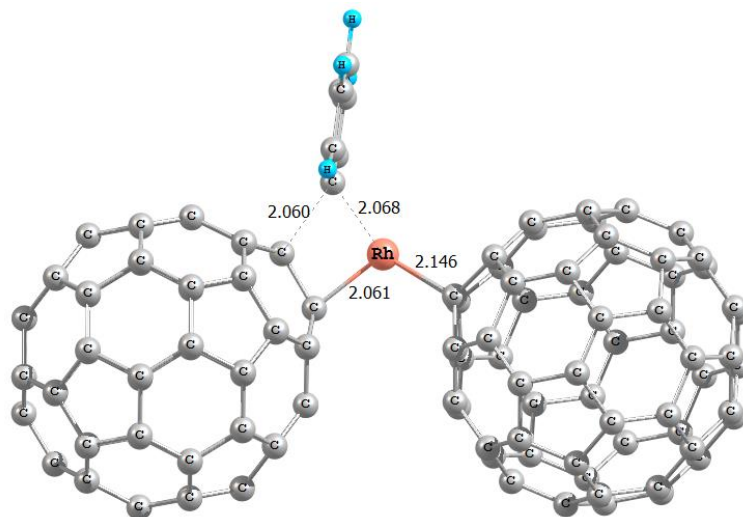

|   |              |              |              |
|---|--------------|--------------|--------------|
| C | -8.417459000 | -0.779734000 | -1.031141000 |
| C | -7.637900000 | -2.894839000 | -0.025533000 |
| C | -8.302410000 | -0.930089000 | 1.312459000  |
| C | -8.363998000 | -1.707789000 | 0.085992000  |
| C | -1.104006000 | 3.755162000  | 0.011526000  |
| C | -1.081256000 | 4.467451000  | -1.202816000 |
| C | -1.041534000 | 4.444201000  | 1.236647000  |
| C | -0.895908000 | 5.851981000  | -1.183125000 |
| H | -1.201911000 | 3.948105000  | -2.148579000 |
| C | -0.858952000 | 5.829659000  | 1.236288000  |
| H | -1.127312000 | 3.905783000  | 2.175379000  |
| C | -0.783982000 | 6.534244000  | 0.031738000  |
| H | -0.855381000 | 6.397897000  | -2.122065000 |
| H | -0.789561000 | 6.358277000  | 2.183400000  |
| H | -0.658942000 | 7.613202000  | 0.039726000  |

# U

|    |              |              |              |
|----|--------------|--------------|--------------|
| Rh | 0.181344000  | 2.382377000  | -0.000032000 |
| C  | 1.781984000  | 1.172248000  | -0.735055000 |
| C  | 1.779620000  | -0.131821000 | -1.434992000 |
| C  | 1.781898000  | 1.172087000  | 0.734900000  |
| C  | 2.815736000  | 1.977689000  | -1.432556000 |
| C  | 1.689743000  | -1.327864000 | -0.734050000 |
| C  | 2.644031000  | -0.052305000 | -2.592667000 |
| C  | 1.779436000  | -0.132115000 | 1.434560000  |
| C  | 2.815524000  | 1.977397000  | 1.432520000  |
| C  | 3.280605000  | 1.252871000  | -2.593935000 |
| C  | 3.695607000  | 2.797159000  | -0.734468000 |
| C  | 1.689655000  | -1.328008000 | 0.733354000  |
| C  | 2.428448000  | -2.492629000 | -1.176807000 |
| C  | 3.353367000  | -1.173949000 | -3.034147000 |
| C  | 2.643661000  | -0.052837000 | 2.592388000  |
| C  | 3.280224000  | 1.252343000  | 2.594025000  |
| C  | 3.695503000  | 2.797008000  | 0.734929000  |
| C  | 4.600736000  | 1.389673000  | -3.034676000 |
| C  | 5.067832000  | 2.935319000  | -1.176890000 |
| C  | 2.428283000  | -2.492866000 | 1.175980000  |
| C  | 2.885392000  | -3.213030000 | -0.000452000 |
| C  | 3.242062000  | -2.423264000 | -2.311553000 |
| C  | 4.728914000  | -1.032965000 | -3.484294000 |
| C  | 3.352916000  | -1.174575000 | 3.033748000  |
| C  | 4.600289000  | 1.389052000  | 3.034986000  |
| C  | 5.067659000  | 2.935080000  | 1.177585000  |
| C  | 5.514472000  | 2.249152000  | -2.310990000 |
| C  | 5.339187000  | 0.221155000  | -3.485383000 |
| C  | 5.916357000  | 3.019216000  | 0.000418000  |
| C  | 3.241724000  | -2.423734000 | 2.310865000  |
| C  | 4.135214000  | -3.832402000 | -0.000421000 |
| C  | 4.547601000  | -3.060594000 | -2.308803000 |
| C  | 5.467891000  | -2.201438000 | -3.035938000 |
| C  | 4.728400000  | -1.033685000 | 3.484121000  |
| C  | 5.514134000  | 2.248684000  | 2.311616000  |
| C  | 5.338673000  | 0.220436000  | 3.485563000  |
| C  | 6.821558000  | 1.615993000  | -2.308554000 |
| C  | 6.713861000  | 0.361161000  | -3.035412000 |
| C  | 7.174497000  | 2.416565000  | 0.000452000  |
| C  | 4.547260000  | -3.061063000 | 2.308177000  |
| C  | 4.985759000  | -3.751691000 | 1.176666000  |
| C  | 4.985754000  | -3.751452000 | -1.177366000 |
| C  | 6.788451000  | -2.067854000 | -2.602827000 |
| C  | 5.467443000  | -2.202062000 | 3.035632000  |
| C  | 6.821220000  | 1.615521000  | 2.309241000  |
| C  | 6.713409000  | 0.360532000  | 3.035815000  |
| C  | 7.635262000  | 1.697441000  | -1.176617000 |
| C  | 7.423892000  | -0.759892000 | -2.602240000 |
| C  | 7.635093000  | 1.697204000  | 1.177444000  |
| C  | 6.359145000  | -3.613442000 | 0.727274000  |
| C  | 6.359253000  | -3.613293000 | -0.727742000 |
| C  | 7.243352000  | -2.788036000 | -1.425724000 |
| C  | 6.788067000  | -2.068391000 | 2.602744000  |
| C  | 7.423510000  | -0.760430000 | 2.602521000  |
| C  | 8.374377000  | 0.531858000  | -0.727057000 |
| C  | 8.270804000  | -0.672965000 | -1.424947000 |
| C  | 8.374275000  | 0.531710000  | 0.727730000  |
| C  | 7.243141000  | -2.788332000 | 1.425559000  |
| C  | 8.160027000  | -1.926379000 | -0.697881000 |
| C  | 8.270601000  | -0.673260000 | 1.425373000  |
| C  | 8.159929000  | -1.926526000 | 0.698032000  |
| C  | -1.600613000 | 1.293978000  | 0.000072000  |
| C  | -1.722796000 | 0.363300000  | -1.170383000 |
| C  | -2.563151000 | 2.552220000  | 0.000044000  |
| C  | -1.722858000 | 0.363290000  | 1.170492000  |
| C  | -2.497585000 | 0.623988000  | -2.288202000 |
| C  | -1.576078000 | -1.001670000 | -0.724520000 |
| C  | -3.549486000 | 2.584164000  | -1.178327000 |
| C  | -3.549509000 | 2.584191000  | 1.178395000  |
| C  | -1.576115000 | -1.001672000 | 0.724631000  |
| C  | -2.497663000 | 0.623987000  | 2.288296000  |
| C  | -3.443146000 | 1.761979000  | -2.279872000 |
| C  | -3.130487000 | -0.458988000 | -3.006685000 |
| C  | -2.157185000 | -2.062216000 | -1.425269000 |
| C  | -4.851516000 | 2.993776000  | -0.726072000 |
| C  | -4.851537000 | 2.993783000  | 0.726091000  |
| C  | -3.443220000 | 1.761979000  | 2.279927000  |
| C  | -2.157239000 | -2.062219000 | 1.425363000  |
| C  | -3.130589000 | -0.458992000 | 3.006751000  |
| C  | -4.628173000 | 1.356297000  | -3.005157000 |
| C  | -4.439727000 | -0.011641000 | -3.451780000 |
| C  | -2.954994000 | -1.786945000 | -2.597036000 |
| C  | -2.776472000 | -3.157856000 | -0.697258000 |
| C  | -6.008235000 | 2.628568000  | -1.425193000 |
| C  | -6.008281000 | 2.628573000  | 1.425166000  |
| C  | -4.628272000 | 1.356294000  | 3.005173000  |
| C  | -2.955084000 | -1.786947000 | 2.597103000  |
| C  | -2.776495000 | -3.157862000 | 0.697332000  |
| C  | -4.439843000 | -0.011643000 | 3.451801000  |
| C  | -5.893171000 | 1.788912000  | -2.593191000 |
| C  | -5.518090000 | -0.896662000 | -3.469274000 |
| C  | -4.079434000 | -2.703626000 | -2.599693000 |
| C  | -3.968858000 | -3.554987000 | -1.425208000 |
| C  | -7.203993000 | 2.233834000  | -0.697131000 |
| C  | -5.893256000 | 1.788907000  | 2.593163000  |
| C  | -7.204013000 | 2.233834000  | 0.697061000  |
| C  | -4.079521000 | -2.703635000 | 2.599727000  |
| C  | -3.968907000 | -3.554992000 | 1.425242000  |
| C  | -5.518205000 | -0.896665000 | 3.469259000  |
| C  | -7.014477000 | 0.867023000  | -2.599790000 |
| C  | -6.829768000 | -0.449499000 | -3.026163000 |
| C  | -5.336357000 | -2.270593000 | -3.029042000 |
| C  | -5.116753000 | -3.935470000 | -0.727249000 |
| C  | -7.826775000 | 1.141583000  | -1.425171000 |
| C  | -7.014564000 | 0.867021000  | 2.599728000  |
| C  | -7.826821000 | 1.141582000  | 1.425080000  |
| C  | -5.336457000 | -2.270599000 | 3.029031000  |
| C  | -5.116778000 | -3.935473000 | 0.727244000  |
| C  | -6.829866000 | -0.449953000 | 3.026103000  |
| C  | -7.452442000 | -1.542478000 | -2.304381000 |
| C  | -6.528047000 | -2.667502000 | -2.304374000 |
| C  | -6.422190000 | -3.483590000 | -1.175784000 |
| C  | -8.422110000 | 0.088964000  | -0.727171000 |
| C  | -8.422135000 | 0.088964000  | 0.727059000  |
| C  | -6.528123000 | -2.667507000 | 2.304324000  |
| C  | -6.422290000 | -3.483590000 | 1.175734000  |
| C  | -7.452517000 | -1.542481000 | 2.304299000  |

$$E_g(\text{B3LYP}/6\text{-}31\text{G}(\text{d})) = -4914.51438$$

$$G_g(\text{B3LYP}/6\text{-}31\text{G}(\text{d})) = -4913.74627$$

$$E_s(\text{M06}/6\text{-}311\text{G}(\text{d},\text{p})//\text{B3LYP}/6\text{-}31\text{G}(\text{d})) = -4912.09510$$

$$G_s(\text{M06}/6\text{-}311\text{G}(\text{d},\text{p})//\text{B3LYP}/6\text{-}31\text{G}(\text{d})) = -4911.32699$$

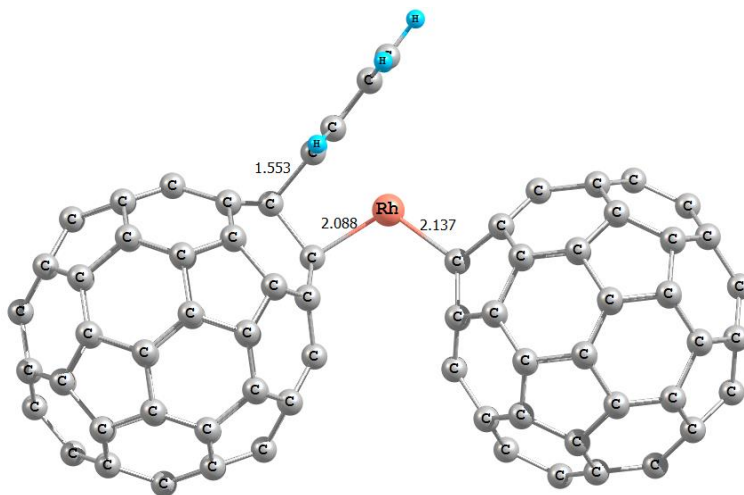



|   |              |              |              |
|---|--------------|--------------|--------------|
| C | -8.232024000 | -1.279377000 | -1.175537000 |
| C | -7.229219000 | -3.203906000 | -0.000038000 |
| C | -8.232061000 | -1.279377000 | 1.175429000  |
| C | -8.116225000 | -2.125763000 | -0.000053000 |
| C | -1.560636000 | 3.738022000  | 0.000012000  |
| C | -1.086748000 | 4.291913000  | -1.220449000 |
| C | -1.086655000 | 4.291826000  | 1.220475000  |
| C | -0.227025000 | 5.396985000  | -1.210625000 |
| H | -1.459847000 | 3.905513000  | -2.162944000 |
| C | -0.226952000 | 5.396924000  | 1.210670000  |
| H | -1.459702000 | 3.905366000  | 2.162967000  |
| C | 0.196611000  | 5.953880000  | 0.000030000  |
| H | 0.103105000  | 5.823510000  | -2.153370000 |
| H | 0.103227000  | 5.823395000  | 2.153424000  |
| H | 0.856340000  | 6.816517000  | 0.000030000  |

**V**

|    |              |              |              |
|----|--------------|--------------|--------------|
| Rh | 0.141395000  | 2.420280000  | -0.478912000 |
| C  | 1.773590000  | 1.046044000  | -1.030858000 |
| C  | 1.692646000  | -0.401728000 | -1.334292000 |
| C  | 1.838452000  | 1.451489000  | 0.384471000  |
| C  | 2.827211000  | 1.550429000  | -1.944635000 |
| C  | 1.578201000  | -1.353118000 | -0.329148000 |
| C  | 2.503867000  | -0.700843000 | -2.494519000 |
| C  | 1.817859000  | 0.385267000  | 1.418949000  |
| C  | 2.955544000  | 2.343532000  | 0.799744000  |
| C  | 3.204334000  | 0.510751000  | -2.875655000 |
| C  | 3.778900000  | 2.483941000  | -1.538047000 |
| C  | 1.645738000  | -0.949448000 | 1.078691000  |
| C  | 2.235111000  | -2.636744000 | -0.452864000 |
| C  | 3.135712000  | -1.942075000 | -2.629253000 |
| C  | 2.738608000  | 0.725974000  | 2.481958000  |
| C  | 3.439902000  | 1.939066000  | 2.100420000  |
| C  | 3.848804000  | 2.877482000  | -0.120759000 |
| C  | 4.509284000  | 0.441431000  | -3.374376000 |
| C  | 5.137670000  | 2.406855000  | -2.038490000 |
| C  | 2.341672000  | -1.990629000 | 1.805917000  |
| C  | 2.707486000  | -3.033352000 | 0.863022000  |
| C  | 2.996446000  | -2.935163000 | -1.586372000 |
| C  | 4.494945000  | -2.013203000 | -3.141018000 |
| C  | 3.411827000  | -0.270586000 | 3.196673000  |
| C  | 4.784213000  | 2.112075000  | 2.448008000  |
| C  | 5.244028000  | 3.050607000  | 0.222186000  |
| C  | 5.497990000  | 1.410848000  | -2.950157000 |
| C  | 5.167075000  | -0.847685000 | -3.509018000 |
| C  | 6.040844000  | 2.759782000  | -0.956734000 |
| C  | 3.207148000  | -1.661258000 | 2.852694000  |
| C  | 3.923099000  | -3.703989000 | 0.997856000  |
| C  | 4.267132000  | -3.624661000 | -1.445321000 |
| C  | 5.195016000  | -3.056199000 | -2.409249000 |
| C  | 4.811923000  | -0.094481000 | 3.548910000  |
| C  | 5.706903000  | 2.681398000  | 1.488932000  |
| C  | 5.483891000  | 1.072007000  | 3.185155000  |
| C  | 6.770170000  | 0.724840000  | -2.810712000 |
| C  | 6.566307000  | -0.672569000 | -3.157244000 |
| C  | 7.267631000  | 2.106992000  | -0.827147000 |
| C  | 4.477198000  | -2.352926000 | 2.989032000  |
| C  | 4.828739000  | -3.353040000 | 2.080605000  |
| C  | 4.721741000  | -4.002045000 | -0.180067000 |
| C  | 6.538678000  | -2.887670000 | -2.069592000 |
| C  | 5.470953000  | -1.383720000 | 3.420650000  |
| C  | 6.979492000  | 1.995532000  | 1.623395000  |
| C  | 6.842447000  | 0.999355000  | 2.673652000  |
| C  | 7.638772000  | 1.065863000  | -1.771786000 |
| C  | 7.238508000  | -1.671486000 | -2.451447000 |
| C  | 7.743933000  | 1.712931000  | 0.489252000  |
| C  | 6.185466000  | -3.428172000 | 1.569743000  |
| C  | 6.118942000  | -3.828110000 | 0.172063000  |
| C  | 7.010806000  | -3.282617000 | -0.753492000 |
| C  | 6.775278000  | -1.454639000 | 2.928099000  |
| C  | 7.474915000  | -0.238620000 | 2.546445000  |
| C  | 8.337674000  | 0.026275000  | -1.038088000 |
| C  | 8.142310000  | -1.315519000 | -1.370717000 |
| C  | 8.403880000  | 0.426779000  | 0.358984000  |
| C  | 7.140085000  | -2.497538000 | 1.984432000  |
| C  | 8.001888000  | -2.311140000 | -0.321007000 |
| C  | 8.270881000  | -0.530645000 | 1.366549000  |
| C  | 8.065150000  | -1.926803000 | 1.019513000  |
| C  | -1.557577000 | 1.236184000  | -0.019542000 |
| C  | -1.794460000 | 0.471961000  | -1.288813000 |
| C  | -2.516417000 | 2.476433000  | 0.229036000  |
| C  | -1.602359000 | 0.151941000  | 1.016533000  |
| C  | -2.648062000 | 0.880584000  | -2.303362000 |
| C  | -1.623671000 | -0.942921000 | -1.049870000 |
| C  | -3.596672000 | 2.654460000  | -0.848704000 |
| C  | -3.410387000 | 2.338485000  | 1.477437000  |
| C  | -1.509897000 | -1.140084000 | 0.379215000  |
| C  | -2.282436000 | 0.250722000  | 2.219268000  |
| C  | -3.584599000 | 1.996997000  | -2.060173000 |
| C  | -3.344595000 | -0.097900000 | -3.110802000 |
| C  | -2.263289000 | -1.898441000 | -1.842668000 |
| C  | -4.856141000 | 2.992817000  | -0.243507000 |
| C  | -4.741061000 | 2.799082000  | 1.190743000  |
| C  | -3.219287000 | 1.375532000  | 2.444448000  |
| C  | -2.037627000 | -2.291031000 | 0.972347000  |
| C  | -2.866930000 | -0.923643000 | 2.828592000  |
| C  | -4.826537000 | 1.691488000  | -2.737264000 |
| C  | -4.683476000 | 0.399733000  | -3.382233000 |
| C  | -3.148726000 | -1.468930000 | -2.900852000 |
| C  | -2.829935000 | -3.086763000 | -1.225072000 |
| C  | -6.067578000 | 2.728254000  | -0.891870000 |
| C  | -5.841568000 | 2.339532000  | 1.923497000  |
| C  | -4.347058000 | 0.868091000  | 3.196820000  |
| C  | -2.735164000 | -2.183608000 | 2.230341000  |
| C  | -2.719035000 | -3.278993000 | 0.151917000  |
| C  | -4.133822000 | -0.547269000 | 3.433676000  |
| C  | -6.051770000 | 2.058742000  | -2.170064000 |
| C  | -5.766648000 | -0.478717000 | -3.433984000 |
| C  | -4.276060000 | -2.380991000 | -2.938279000 |
| C  | -4.078723000 | -3.384972000 | -1.903283000 |
| C  | -7.205111000 | 2.234230000  | -0.131680000 |
| C  | -5.638976000 | 1.348455000  | 2.952601000  |
| C  | -7.094046000 | 2.043047000  | 1.245056000  |
| C  | -3.862519000 | -3.096588000 | 2.197014000  |
| C  | -3.852071000 | -3.778118000 | 0.911185000  |
| C  | -5.213764000 | -1.431083000 | 3.416912000  |
| C  | -7.176746000 | 1.142612000  | -2.213228000 |
| C  | -7.035910000 | -0.102374000 | -2.829887000 |
| C  | -5.560677000 | -1.898810000 | -3.202497000 |
| C  | -5.170082000 | -3.862498000 | -1.175095000 |
| C  | -7.891062000 | 1.250064000  | -0.951030000 |
| C  | -6.761890000 | 0.428984000  | 2.920771000  |
| C  | -7.663779000 | 0.858643000  | 1.863566000  |
| C  | -5.078047000 | -2.731146000 | 2.780033000  |
| C  | -5.054342000 | -4.062178000 | 0.261110000  |
| C  | -6.553886000 | -0.933435000 | 3.146664000  |
| C  | -7.607099000 | -1.285795000 | -2.217111000 |
| C  | -6.693597000 | -2.396238000 | -2.445780000 |
| C  | -6.504097000 | -3.358972000 | -1.451932000 |
| C  | -8.437257000 | 0.109442000  | -0.358544000 |
| C  | -8.320838000 | -0.090209000 | 1.077197000  |
| C  | -6.326663000 | -3.029167000 | 2.104981000  |
| C  | -6.316751000 | -3.681562000 | 0.869810000  |
| C  | -7.239740000 | -1.918547000 | 2.332863000  |

 $E_g(\text{B3LYP}/6\text{-}31\text{G}(\text{d})) = -4990.94330$  $G_g(\text{B3LYP}/6\text{-}31\text{G}(\text{d})) = -4990.15131$  $E_s(\text{M06}/6\text{-}311\text{G}(\text{d,p})//\text{B3LYP}/6\text{-}31\text{G}(\text{d})) = -4988.52850$  $G_s(\text{M06}/6\text{-}311\text{G}(\text{d,p})//\text{B3LYP}/6\text{-}31\text{G}(\text{d})) = -4987.73651$ 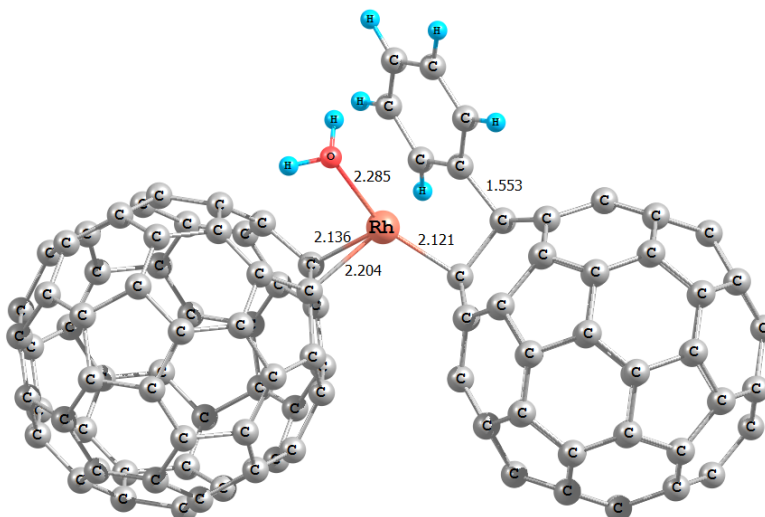

|   |              |              |              |
|---|--------------|--------------|--------------|
| C | -8.292955000 | -1.183635000 | -1.004490000 |
| C | -7.213022000 | -3.246842000 | -0.187990000 |
| C | -8.105602000 | -1.506522000 | 1.317030000  |
| C | -8.090482000 | -2.183170000 | 0.031074000  |
| C | -1.559725000 | 3.695188000  | 0.329178000  |
| C | -1.742021000 | 4.882379000  | -0.432684000 |
| C | -0.595367000 | 3.706133000  | 1.379466000  |
| C | -0.997977000 | 6.020415000  | -0.167044000 |
| H | -2.487417000 | 4.893191000  | -1.221329000 |
| C | 0.139714000  | 4.885795000  | 1.649766000  |
| H | -0.574440000 | 2.901269000  | 2.106620000  |
| C | -0.051316000 | 6.024980000  | 0.882290000  |
| H | -1.156792000 | 6.918151000  | -0.757829000 |
| H | 0.837003000  | 4.895503000  | 2.482657000  |
| H | 0.501434000  | 6.933323000  | 1.107937000  |
| O | 1.226175000  | 4.145432000  | -1.512775000 |
| H | 2.166939000  | 3.973664000  | -1.705192000 |
| H | 1.187194000  | 4.918452000  | -0.921857000 |

**X**

|    |              |              |              |
|----|--------------|--------------|--------------|
| Rh | -0.067947000 | 1.516067000  | -0.583205000 |
| C  | 1.913965000  | 0.780081000  | -1.111718000 |
| C  | 2.103804000  | -0.570912000 | -1.683398000 |
| C  | 1.776091000  | 0.903727000  | 0.338452000  |
| C  | 2.902084000  | 1.638955000  | -1.799306000 |
| C  | 2.068429000  | -1.709722000 | -0.885935000 |
| C  | 3.055763000  | -0.492362000 | -2.770568000 |
| C  | 1.842175000  | -0.328319000 | 1.156551000  |
| C  | 2.635599000  | 1.885804000  | 1.041847000  |
| C  | 3.548320000  | 0.871626000  | -2.842148000 |
| C  | 3.624937000  | 2.608606000  | -1.113030000 |
| C  | 1.936523000  | -1.583876000 | 0.568580000  |
| C  | 2.965682000  | -2.815397000 | -1.153928000 |
| C  | 3.915541000  | -1.560992000 | -3.043770000 |
| C  | 2.579338000  | -0.050874000 | 2.369464000  |
| C  | 3.070485000  | 1.314372000  | 2.298690000  |
| C  | 3.490106000  | 2.730601000  | 0.342074000  |
| C  | 4.881925000  | 1.117458000  | -3.184712000 |
| C  | 5.011010000  | 2.858510000  | -1.451777000 |
| C  | 2.750609000  | -2.614912000 | 1.180341000  |
| C  | 3.387005000  | -3.376409000 | 0.119280000  |
| C  | 3.869333000  | -2.750005000 | -2.218637000 |
| C  | 5.303608000  | -1.305027000 | -3.391386000 |
| C  | 3.356830000  | -1.043627000 | 2.973350000  |
| C  | 4.322494000  | 1.634601000  | 2.832906000  |
| C  | 4.794525000  | 3.059172000  | 0.882852000  |
| C  | 5.630329000  | 2.133461000  | -2.474633000 |
| C  | 5.776871000  | 0.005692000  | -3.460591000 |
| C  | 5.734780000  | 3.137938000  | -0.222363000 |
| C  | 3.444017000  | -2.355622000 | 2.365956000  |
| C  | 4.690043000  | -3.847107000 | 0.280587000  |
| C  | 5.228947000  | -3.233060000 | -2.048277000 |
| C  | 6.116578000  | -2.339940000 | -2.774751000 |
| C  | 4.661980000  | -0.710988000 | 3.520676000  |
| C  | 5.204123000  | 2.526500000  | 2.108952000  |
| C  | 5.134753000  | 0.599768000  | 3.452268000  |
| C  | 6.991274000  | 1.653964000  | -2.305194000 |
| C  | 7.082609000  | 0.337830000  | -2.915551000 |
| C  | 7.043414000  | 2.682609000  | -0.061895000 |
| C  | 4.803822000  | -2.839147000 | 2.531616000  |
| C  | 5.414719000  | -3.569634000 | 1.510537000  |
| C  | 5.631964000  | -3.771789000 | -0.824749000 |
| C  | 7.370478000  | -2.021882000 | -2.249763000 |
| C  | 5.557555000  | -1.822345000 | 3.246898000  |
| C  | 6.565462000  | 2.047124000  | 2.275469000  |
| C  | 6.522901000  | 0.854945000  | 3.106412000  |
| C  | 7.684350000  | 1.922783000  | -1.123357000 |
| C  | 7.863006000  | -0.655620000 | -2.320864000 |
| C  | 7.466745000  | 2.122885000  | 1.211899000  |
| C  | 6.801658000  | -3.315970000 | 1.164701000  |
| C  | 6.935919000  | -3.440437000 | -0.278650000 |
| C  | 7.789029000  | -2.583599000 | -0.976746000 |
| C  | 6.890968000  | -1.577957000 | 2.913334000  |
| C  | 7.383400000  | -0.211958000 | 2.841416000  |
| C  | 8.496819000  | 0.890290000  | -0.505616000 |
| C  | 8.585500000  | -0.373785000 | -1.092014000 |
| C  | 8.362687000  | 1.014051000  | 0.937510000  |
| C  | 7.526000000  | -2.340098000 | 1.851932000  |
| C  | 8.540483000  | -1.565510000 | -0.260763000 |
| C  | 8.322461000  | -1.030831000 | 1.735516000  |
| C  | 8.412354000  | -1.446648000 | 1.124306000  |
| C  | -2.248213000 | 1.803777000  | -0.381409000 |
| C  | -2.547103000 | 1.223192000  | -1.700168000 |
| C  | -3.203864000 | 2.868397000  | 0.228383000  |
| C  | -1.775890000 | 0.697174000  | 0.438498000  |
| C  | -3.642029000 | 1.573008000  | -2.479693000 |
| C  | -2.021851000 | -0.121790000 | -1.748721000 |
| C  | -4.535846000 | 2.909667000  | -0.571582000 |
| C  | -3.756255000 | 2.372549000  | 1.599891000  |
| C  | -1.478246000 | -0.437979000 | -0.431747000 |
| C  | -2.130275000 | 0.501711000  | 1.784627000  |
| C  | -4.686300000 | 2.406449000  | -1.851083000 |
| C  | -4.294690000 | 0.556452000  | -3.263816000 |
| C  | -2.614185000 | -1.094807000 | -2.549319000 |
| C  | -5.659534000 | 2.875971000  | 0.324758000  |
| C  | -5.182949000 | 2.549206000  | 1.657600000  |
| C  | -3.185106000 | 1.359913000  | 2.346304000  |
| C  | -1.638413000 | -1.757785000 | 0.084721000  |
| C  | -2.292341000 | -0.817261000 | 2.278344000  |
| C  | -5.967393000 | 1.907184000  | -2.300320000 |
| C  | -5.731202000 | 0.764566000  | -3.165776000 |
| C  | -3.786819000 | -0.754824000 | -3.321277000 |
| C  | -2.77785000  | -2.440527000 | -2.012341000 |
| C  | -6.915586000 | 2.419298000  | -0.099088000 |
| C  | -5.976617000 | 1.769196000  | 2.511300000  |
| C  | -3.983270000 | 0.534127000  | 3.224373000  |
| C  | -2.050427000 | -1.939986000 | 1.442403000  |
| C  | -2.306241000 | -2.760487000 | -0.736140000 |
| C  | -3.444977000 | -0.813319000 | 3.180907000  |
| C  | -7.072411000 | 1.921843000  | -1.443832000 |
| C  | -6.601163000 | -0.325206000 | -3.135520000 |
| C  | -4.691422000 | -1.883762000 | -3.263185000 |
| C  | -4.067748000 | -2.928926000 | -2.463648000 |
| C  | -7.728211000 | 1.597491000  | 0.784372000  |
| C  | -5.362682000 | 0.738303000  | 3.315550000  |
| C  | -7.270336000 | 1.279654000  | 2.060751000  |
| C  | -2.967641000 | -3.071105000 | 1.491926000  |
| C  | -3.121507000 | -3.582895000 | 0.141958000  |
| C  | -4.303560000 | -1.904078000 | 3.222094000  |
| C  | -7.977039000 | 0.787157000  | -1.407267000 |
| C  | -7.474318000 | -0.316136000 | -2.233556000 |
| C  | -6.073392000 | -1.679412000 | -3.183866000 |
| C  | -4.847767000 | -3.721790000 | -1.619183000 |
| C  | -8.383569000 | 0.584580000  | -0.027685000 |
| C  | -6.260474000 | -0.399756000 | 3.359835000  |
| C  | -7.443272000 | -0.065841000 | 2.583284000  |
| C  | -4.061963000 | -3.058030000 | 2.357261000  |
| C  | -4.364355000 | -4.054316000 | -0.288860000 |
| C  | -5.739756000 | -1.696618000 | 3.309952000  |
| C  | -7.913286000 | -1.658498000 | -1.717689000 |
| C  | -6.877277000 | -2.500806000 | -2.302908000 |
| C  | -6.280823000 | -3.506024000 | -1.537894000 |
| C  | -8.544098000 | -0.710468000 | 0.470055000  |
| C  | -8.063722000 | -1.042308000 | 1.802174000  |
| C  | -5.348499000 | -3.550419000 | 1.913440000  |
| C  | -5.499457000 | -4.040790000 | 0.613768000  |
| C  | -6.384556000 | -2.710096000 | 2.499492000  |

 $E_g(\text{B3LYP}/6\text{-}31\text{G}(\text{d})) = -4990.93143$  $G_g(\text{B3LYP}/6\text{-}31\text{G}(\text{d})) = -4990.14185$  $E_s(\text{M06}/6\text{-}311\text{G}(\text{d,p})//\text{B3LYP}/6\text{-}31\text{G}(\text{d})) = -4988.51354$  $G_s(\text{M06}/6\text{-}311\text{G}(\text{d,p})//\text{B3LYP}/6\text{-}31\text{G}(\text{d})) = -4987.72396$ 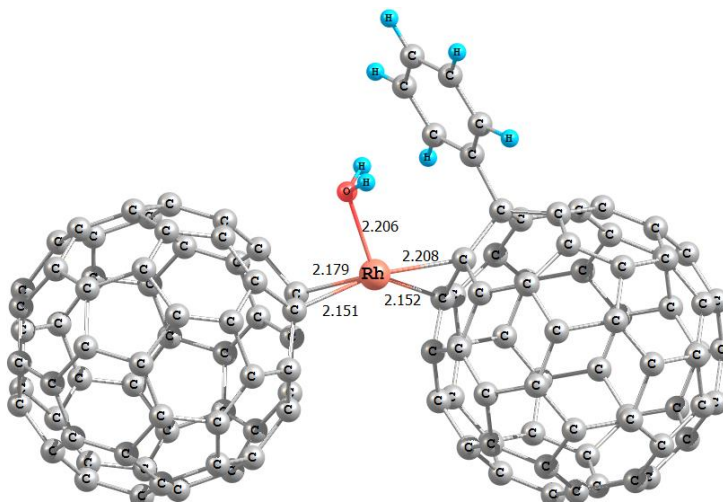

|   |              |              |              |
|---|--------------|--------------|--------------|
| C | -8.304605000 | -1.853893000 | -0.391345000 |
| C | -6.685530000 | -3.701871000 | -0.155724000 |
| C | -7.524955000 | -2.391049000 | 1.760046000  |
| C | -7.676688000 | -2.895425000 | 0.405095000  |
| C | -2.512815000 | 4.240290000  | 0.322145000  |
| C | -2.643785000 | 5.186720000  | -0.702440000 |
| C | -1.664381000 | 4.534144000  | 1.402447000  |
| C | -1.937168000 | 6.393154000  | -0.657251000 |
| H | -3.306446000 | 4.983033000  | -1.538262000 |
| C | -0.955372000 | 5.739224000  | 1.447350000  |
| H | -1.561626000 | 3.819798000  | 2.214181000  |
| C | -1.088106000 | 6.674011000  | 0.414532000  |
| H | -2.058415000 | 7.115328000  | -1.460215000 |
| H | -0.309433000 | 5.950225000  | 2.295420000  |
| H | -0.541727000 | 7.611962000  | 0.451846000  |
| O | 0.594155000  | 3.610353000  | -0.791138000 |
| H | 0.178086000  | 3.985175000  | -1.585733000 |
| H | 0.179529000  | 4.088804000  | -0.045384000 |

# X-Y

|    |              |              |              |
|----|--------------|--------------|--------------|
| Rh | 0.017428000  | 1.662517000  | -0.207535000 |
| C  | 1.709631000  | 0.425097000  | -0.640305000 |
| C  | 1.747057000  | -1.018682000 | -0.313687000 |
| C  | 2.030575000  | 1.383696000  | 0.419740000  |
| C  | 2.403570000  | 0.554014000  | -1.942576000 |
| C  | 1.998450000  | -1.458035000 | 0.980180000  |
| C  | 2.308085000  | -1.737536000 | -1.435925000 |
| C  | 2.577768000  | 0.860768000  | 1.760826000  |
| C  | 3.036188000  | 2.431767000  | 0.132028000  |
| C  | 2.713870000  | -0.768310000 | -2.439718000 |
| C  | 3.277382000  | 1.606677000  | -2.190016000 |
| C  | 2.317455000  | -0.497894000 | 2.044302000  |
| C  | 2.796721000  | -2.646793000 | 1.201992000  |
| C  | 3.070564000  | -2.891137000 | -1.231751000 |
| C  | 3.448556000  | 1.661760000  | 2.311836000  |
| C  | 3.853361000  | 2.631567000  | 1.308118000  |
| C  | 3.598233000  | 2.570815000  | -1.130636000 |
| C  | 3.865149000  | -0.989528000 | -3.200159000 |
| C  | 4.479822000  | 1.384081000  | -2.968650000 |
| C  | 3.312579000  | -1.105698000 | 2.904427000  |
| C  | 3.608919000  | -2.431645000 | 2.387650000  |
| C  | 3.320863000  | -3.355267000 | 0.116816000  |
| C  | 4.272760000  | -3.116918000 | -2.018196000 |
| C  | 4.405318000  | 1.085405000  | 3.153048000  |
| C  | 5.199726000  | 2.989229000  | 1.183955000  |
| C  | 4.995662000  | 2.926620000  | -1.267738000 |
| C  | 4.768091000  | 0.110804000  | -3.469289000 |
| C  | 4.661925000  | -2.185980000 | -2.981365000 |
| C  | 5.541512000  | 2.197158000  | -2.400681000 |
| C  | 4.336162000  | -0.329041000 | 3.456248000  |
| C  | 4.910703000  | -2.929216000 | 2.442420000  |
| C  | 4.677959000  | -3.870493000 | 0.171514000  |
| C  | 5.267404000  | -3.723415000 | -1.149228000 |
| C  | 5.805582000  | 1.452032000  | 3.017607000  |
| C  | 5.783711000  | 3.140130000  | -0.132561000 |
| C  | 6.194462000  | 2.383580000  | 2.054258000  |
| C  | 6.126965000  | -0.399830000 | -3.418695000 |
| C  | 6.061861000  | -1.820587000 | -3.116700000 |
| C  | 6.847615000  | 1.709387000  | -2.356013000 |
| C  | 5.693339000  | -0.844602000 | 3.507690000  |
| C  | 5.975495000  | -2.118794000 | 3.011825000  |
| C  | 5.457640000  | -3.660088000 | 1.310230000  |
| C  | 6.612752000  | -3.372296000 | -1.277818000 |
| C  | 6.602981000  | 0.257081000  | 3.237473000  |
| C  | 7.141424000  | 2.625963000  | -0.083390000 |
| C  | 7.397157000  | 2.159221000  | 1.269593000  |
| C  | 7.145744000  | 0.382877000  | -2.872297000 |
| C  | 7.017834000  | -2.401244000 | -2.281328000 |
| C  | 7.663936000  | 1.925834000  | -1.172411000 |
| C  | 7.176651000  | -2.344539000 | 2.228376000  |
| C  | 6.856619000  | -3.297747000 | 1.176772000  |
| C  | 7.425168000  | -3.155306000 | -0.091352000 |
| C  | 7.156791000  | 0.039974000  | 2.482619000  |
| C  | 8.162475000  | 1.010636000  | 1.478929000  |
| C  | 8.1441421000 | -0.221412000 | -2.005802000 |
| C  | 8.078405000  | -1.585525000 | -1.714859000 |
| C  | 8.461166000  | 0.732450000  | -0.954503000 |
| C  | 8.049910000  | -1.286687000 | 1.968258000  |
| C  | 8.329990000  | -2.052078000 | -0.361666000 |
| C  | 8.705190000  | 0.282928000  | 0.344643000  |
| C  | 8.636125000  | -1.136926000 | 0.646690000  |
| C  | -2.167431000 | 1.781814000  | -0.871811000 |
| C  | -2.902105000 | 1.321619000  | -2.120990000 |
| C  | -2.956266000 | 2.738958000  | 0.125199000  |
| C  | -1.663890000 | 0.453013000  | -0.326361000 |
| C  | -4.146695000 | 1.802813000  | -2.481069000 |
| C  | -2.574424000 | -0.051807000 | -2.426571000 |
| C  | -4.423860000 | 2.951947000  | -0.296645000 |
| C  | -3.185525000 | 2.080250000  | 1.502949000  |
| C  | -1.830553000 | -0.594143000 | -1.322411000 |
| C  | -1.675680000 | 0.138627000  | 1.055327000  |
| C  | -4.927831000 | 2.637396000  | -1.539601000 |
| C  | -5.084357000 | 0.948061000  | -3.181863000 |
| C  | -3.455863000 | -0.880346000 | -3.135437000 |
| C  | -5.286106000 | 2.878132000  | 0.851468000  |
| C  | -4.519679000 | 2.341258000  | 1.960793000  |
| C  | -2.526925000 | 0.955732000  | 1.951872000  |
| C  | -1.962360000 | -1.921892000 | -0.942775000 |
| C  | -1.891986000 | -1.259536000 | 1.436368000  |
| C  | -6.322509000 | 2.281283000  | -1.691659000 |
| C  | -6.422555000 | 1.244529000  | -2.701077000 |
| C  | -4.746630000 | -0.366717000 | -3.523422000 |
| C  | -3.616506000 | -2.266034000 | -2.734207000 |
| C  | -6.643068000 | 2.563929000  | 0.723151000  |
| C  | -5.139172000 | 1.515968000  | 2.907155000  |
| C  | -3.156911000 | 0.073153000  | 2.907091000  |
| C  | -2.002187000 | -2.268528000 | 0.472106000  |
| C  | -2.881079000 | -2.779468000 | -1.661864000 |
| C  | -2.777353000 | -1.289767000 | 2.586547000  |
| C  | -7.175805000 | 2.257853000  | -0.582478000 |
| C  | -7.365408000 | 0.223951000  | -2.568090000 |
| C  | -5.720621000 | -1.432989000 | -3.368073000 |
| C  | -5.020047000 | -2.611005000 | -2.880324000 |
| C  | -7.281789000 | 1.688411000  | 1.693964000  |
| C  | -4.439789000 | 0.352366000  | 3.391710000  |
| C  | -6.544795000 | 1.175772000  | 2.761576000  |
| C  | -2.971733000 | -3.332014000 | 0.625640000  |
| C  | -3.514107000 | -3.651461000 | -0.688804000 |
| C  | -3.704056000 | -2.324953000 | 2.748660000  |
| C  | -8.145927000 | 1.189186000  | -0.433888000 |
| C  | -8.239350000 | 0.191023000  | -1.406025000 |
| C  | -7.003981000 | -1.144818000 | -2.900490000 |
| C  | -5.629674000 | -3.449447000 | -1.945166000 |
| C  | -8.211311000 | 0.835654000  | 0.976767000  |
| C  | -5.404247000 | -0.720872000 | 3.549899000  |
| C  | -6.709620000 | -0.211060000 | 3.160618000  |
| C  | -3.806143000 | -3.367868000 | 1.747538000  |
| C  | -4.861732000 | -3.981570000 | -0.828876000 |
| C  | -5.045058000 | -2.031931000 | 3.233216000  |
| C  | -8.405511000 | -1.195351000 | -1.011990000 |
| C  | -7.640494000 | -2.020592000 | -1.934259000 |
| C  | -6.966934000 | -3.150941000 | -1.464669000 |
| C  | -8.368552000 | -0.499152000 | 1.355744000  |
| C  | -7.602522000 | -1.033019000 | 2.469850000  |
| C  | -5.208104000 | -3.711870000 | 1.598795000  |
| C  | -5.727159000 | -4.012930000 | 0.338091000  |
| C  | -5.974814000 | -2.887019000 | 2.520594000  |

$E_g(\text{B3LYP}/6\text{-}31\text{G}(\text{d})) = -4990.88209$

$G_g(\text{B3LYP}/6\text{-}31\text{G}(\text{d})) = -4990.09725$

$E_s(\text{M06}/6\text{-}311\text{G}(\text{d},\text{p})//\text{B3LYP}/6\text{-}31\text{G}(\text{d})) = -4988.45492$

$G_s(\text{M06}/6\text{-}311\text{G}(\text{d},\text{p})//\text{B3LYP}/6\text{-}31\text{G}(\text{d})) = -4987.67007$

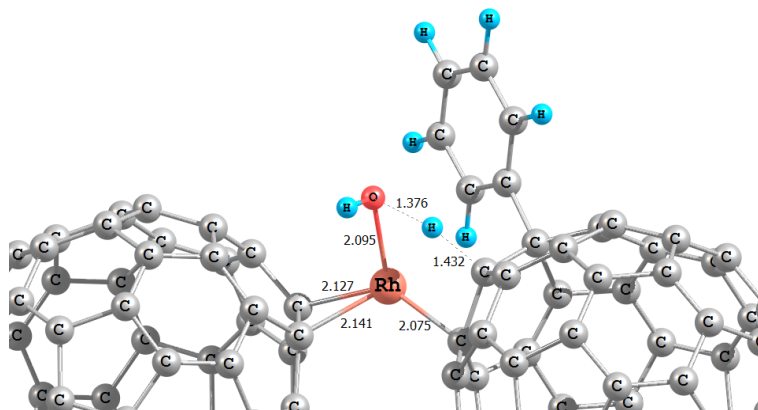

|   |              |              |              |
|---|--------------|--------------|--------------|
| C | -8.466878000 | -1.534590000 | 0.341945000  |
| C | -7.027209000 | -3.498950000 | -0.055181000 |
| C | -7.227918000 | -2.398085000 | 2.143778000  |
| C | -7.763975000 | -2.708541000 | 0.829665000  |
| C | -2.202686000 | 4.077919000  | 0.271075000  |
| C | -2.438970000 | 5.135881000  | -0.614080000 |
| C | -1.216311000 | 4.229841000  | 1.257254000  |
| C | -1.700055000 | 6.316140000  | -0.522740000 |
| H | -3.203450000 | 5.039447000  | -1.379505000 |
| C | -0.475891000 | 5.412182000  | 1.346879000  |
| H | -1.040621000 | 3.435918000  | 1.978061000  |
| C | -0.714576000 | 6.458289000  | 0.456193000  |
| H | -1.897631000 | 7.126693000  | -1.218995000 |
| H | 0.279778000  | 5.513359000  | 2.121223000  |
| H | -0.142128000 | 7.378865000  | 0.526754000  |
| O | 0.127306000  | 3.070330000  | -1.755710000 |
| H | 0.479349000  | 2.603125000  | -2.533805000 |
| H | -1.109076000 | 2.536221000  | -1.472465000 |

**Y**

|    |              |              |              |
|----|--------------|--------------|--------------|
| Rh | 0.046012000  | 1.970427000  | 1.025770000  |
| C  | 1.802516000  | 1.396141000  | -0.055680000 |
| C  | 1.804816000  | 0.516277000  | -1.249504000 |
| C  | 1.799451000  | 0.765569000  | 1.275748000  |
| C  | 2.841922000  | 2.423457000  | -0.342804000 |
| C  | 1.714384000  | -0.862138000 | -1.126260000 |
| C  | 2.667774000  | 1.081684000  | -2.260812000 |
| C  | 1.795998000  | -0.716247000 | 1.347127000  |
| C  | 2.842285000  | 1.186934000  | 2.249806000  |
| C  | 3.308909000  | 2.258849000  | -1.700516000 |
| C  | 3.733132000  | 2.844601000  | 0.634375000  |
| C  | 1.708832000  | -1.491568000 | 0.199227000  |
| C  | 2.439761000  | -1.729668000 | -2.027601000 |
| C  | 3.371145000  | 0.253898000  | -3.142645000 |
| C  | 2.658838000  | -1.144451000 | 2.425897000  |
| C  | 3.303265000  | 0.031331000  | 2.984717000  |
| C  | 3.731949000  | 2.215398000  | 1.961462000  |
| C  | 4.631076000  | 2.561594000  | -2.043857000 |
| C  | 5.105393000  | 3.152389000  | 0.294279000  |
| C  | 2.435734000  | -2.739585000 | 0.097735000  |
| C  | 2.889830000  | -2.888050000 | -1.274647000 |
| C  | 3.253971000  | -1.183749000 | -3.023754000 |
| C  | 4.747456000  | 0.566035000  | -3.491313000 |
| C  | 3.363420000  | -2.349948000 | 2.340951000  |
| C  | 4.624742000  | -0.043150000 | 3.436922000  |
| C  | 5.104532000  | 2.144545000  | 2.420304000  |
| C  | 5.549660000  | 3.020670000  | -1.024212000 |
| C  | 5.364076000  | 1.695347000  | -2.953554000 |
| C  | 5.953913000  | 2.721480000  | 1.392774000  |
| C  | 3.247681000  | -3.167003000 | 1.151461000  |
| C  | 4.134509000  | -3.455427000 | -1.542747000 |
| C  | 4.545457000  | -1.768900000 | -3.298447000 |
| C  | 5.479723000  | -0.686009000 | -3.588115000 |
| C  | 4.738999000  | -2.424424000 | 2.805714000  |
| C  | 5.544826000  | 1.037454000  | 3.149904000  |
| C  | 5.356703000  | -1.295385000 | 3.343187000  |
| C  | 6.853872000  | 2.441270000  | -1.295511000 |
| C  | 6.739652000  | 1.620938000  | -2.489899000 |
| C  | 7.208905000  | 2.171985000  | 1.133277000  |
| C  | 4.548572000  | -3.751175000 | 0.874391000  |
| C  | 4.983624000  | -3.891225000 | -0.445113000 |
| C  | 4.986629000  | -2.880786000 | -2.572275000 |
| C  | 6.800373000  | -0.758930000 | -3.141134000 |
| C  | 5.472241000  | -3.291814000 | 1.898245000  |
| C  | 6.849187000  | 0.460026000  | 2.876555000  |
| C  | 6.733312000  | -0.983917000 | 2.995840000  |
| C  | 7.667082000  | 2.025330000  | -0.239295000 |
| C  | 7.443396000  | 0.418514000  | -2.580736000 |
| C  | 7.664097000  | 1.014696000  | 1.887516000  |
| C  | 6.357964000  | -3.581697000 | -0.794341000 |
| C  | 6.359429000  | -2.956679000 | -2.108523000 |
| C  | 7.248655000  | -1.916772000 | -2.386542000 |
| C  | 6.793666000  | -2.992082000 | 1.561878000  |
| C  | 7.437069000  | -1.814550000 | 2.121901000  |
| C  | 8.399179000  | 0.775833000  | -0.334176000 |
| C  | 8.289613000  | -0.012585000 | -1.481311000 |
| C  | 8.396992000  | 0.151088000  | 0.980381000  |
| C  | 7.245470000  | -3.140062000 | 0.188981000  |
| C  | 8.169791000  | -1.456159000 | -1.361084000 |
| C  | 8.285497000  | -1.235808000 | 1.094330000  |
| C  | 8.168396000  | -2.055341000 | -0.100402000 |
| C  | -2.151457000 | 1.932607000  | -1.148287000 |
| C  | -2.733329000 | 1.098113000  | -2.284623000 |
| C  | -3.203591000 | 2.895279000  | -0.404390000 |
| C  | -1.447277000 | 0.850030000  | -0.274523000 |
| C  | -3.970957000 | 1.311994000  | -2.850620000 |
| C  | -2.174308000 | -0.222264000 | -2.274721000 |
| C  | -4.632796000 | 2.795772000  | -0.978012000 |
| C  | -3.493552000 | 2.467312000  | 1.046331000  |
| C  | -1.453530000 | -0.407213000 | -1.036579000 |
| C  | -1.674759000 | 0.731624000  | 1.138917000  |
| C  | -4.953812000 | 2.182517000  | -2.168241000 |
| C  | -4.697679000 | 0.215175000  | -3.446721000 |
| C  | -2.851529000 | -1.293783000 | -2.881257000 |
| C  | -5.599845000 | 2.804647000  | 0.085154000  |
| C  | -4.895929000 | 2.605579000  | 1.337136000  |
| C  | -2.743208000 | 1.566938000  | 1.773992000  |
| C  | -1.475180000 | -1.660748000 | -0.425979000 |
| C  | -1.788046000 | -0.596476000 | 1.766430000  |
| C  | -6.262584000 | 1.596162000  | -2.363009000 |
| C  | -6.109089000 | 0.387126000  | -3.150655000 |
| C  | -4.144036000 | -1.069336000 | -3.480445000 |
| C  | -2.864433000 | -2.592650000 | -2.242225000 |
| C  | -6.880728000 | 2.268100000  | -0.089496000 |
| C  | -5.500161000 | 1.881087000  | 2.370313000  |
| C  | -3.357935000 | 0.786606000  | 2.828163000  |
| C  | -1.646032000 | -1.756718000 | 1.017829000  |
| C  | -2.195492000 | -2.763654000 | -1.029237000 |
| C  | -2.775255000 | -0.541523000 | 2.817470000  |
| C  | -7.222521000 | 1.648212000  | -1.346744000 |
| C  | -6.911973000 | -0.724486000 | -2.894383000 |
| C  | -4.975853000 | -2.226289000 | -3.203295000 |
| C  | -4.181987000 | -3.172263000 | -2.434270000 |
| C  | -7.498281000 | 1.498840000  | 0.979170000  |
| C  | -4.710591000 | 0.948284000  | 3.137921000  |
| C  | -6.824173000 | 1.312876000  | 2.186330000  |
| C  | -2.468848000 | -2.913410000 | 1.301314000  |
| C  | -2.810172000 | -3.539492000 | 0.035880000  |
| C  | -3.562499000 | -1.657989000 | 3.115714000  |
| C  | -8.048859000 | 0.488206000  | -1.068732000 |
| C  | -7.897372000 | -0.675013000 | -1.826242000 |
| C  | -6.332155000 | -2.058528000 | -2.914535000 |
| C  | -4.772770000 | -3.909207000 | -1.408265000 |
| C  | -8.222768000 | 0.396873000  | 0.373225000  |
| C  | -5.536279000 | -0.209535000 | 3.431244000  |
| C  | -6.844823000 | 0.015014000  | 2.839361000  |
| C  | -3.410298000 | -2.868802000 | 2.334542000  |
| C  | -4.074960000 | -4.099288000 | -0.148543000 |
| C  | -4.974669000 | -1.487652000 | 3.416538000  |
| C  | -7.916425000 | -1.973018000 | -1.178386000 |
| C  | -6.949674000 | -2.827055000 | -1.851549000 |
| C  | -6.186772000 | -3.734795000 | -1.111384000 |
| C  | -8.238714000 | -0.852964000 | 0.996470000  |
| C  | -7.537948000 | -1.047864000 | 2.255180000  |
| C  | -4.726640000 | -3.446940000 | 2.142158000  |
| C  | -5.053572000 | -4.049048000 | 0.925308000  |
| C  | -5.695641000 | -2.592253000 | 2.813607000  |

$$E_g(\text{B3LYP}/6\text{-}31\text{G}(\text{d})) = -4990.93619$$

$$G_g(\text{B3LYP}/6\text{-}31\text{G}(\text{d})) = -4990.14333$$

$$E_s(\text{M06}/6\text{-}311\text{G}(\text{d,p})//\text{B3LYP}/6\text{-}31\text{G}(\text{d})) = -4988.50519$$

$$G_s(\text{M06}/6\text{-}311\text{G}(\text{d,p})//\text{B3LYP}/6\text{-}31\text{G}(\text{d})) = -4987.71233$$

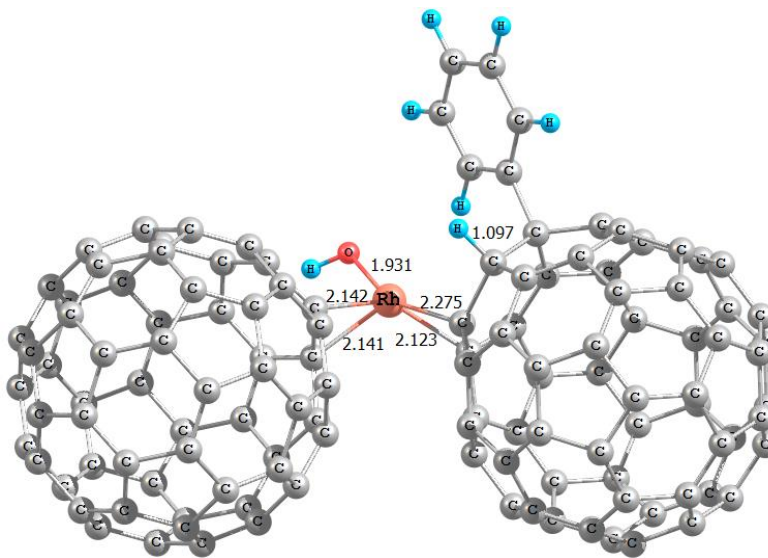



|   |              |              |              |
|---|--------------|--------------|--------------|
| C | -8.084586000 | -2.061871000 | 0.205547000  |
| C | -6.358964000 | -3.822036000 | 0.329668000  |
| C | -6.951328000 | -2.376652000 | 2.241293000  |
| C | -7.289122000 | -3.003681000 | 0.974368000  |
| C | -2.669645000 | 4.340138000  | -0.493736000 |
| C | -2.888504000 | 5.096637000  | -1.654709000 |
| C | -1.888550000 | 4.890483000  | 0.529918000  |
| C | -2.333027000 | 6.368660000  | -1.789218000 |
| H | -3.498484000 | 4.691668000  | -2.457062000 |
| C | -1.323668000 | 6.161869000  | 0.390214000  |
| H | -1.707977000 | 4.340709000  | 1.448317000  |
| C | -1.545954000 | 6.903978000  | -0.767091000 |
| H | -2.517000000 | 6.940577000  | -2.694891000 |
| H | -0.708421000 | 6.558249000  | 1.192316000  |
| H | -1.111370000 | 7.895923000  | -0.874478000 |
| O | 0.822207000  | 3.494031000  | 1.923271000  |
| H | 1.644786000  | 3.336644000  | 2.414473000  |
| H | -1.387080000 | 2.601056000  | -1.562597000 |

# Y-Z

|    |              |              |              |
|----|--------------|--------------|--------------|
| Rh | -0.499434000 | 1.933781000  | -0.731372000 |
| C  | -2.511054000 | 1.760147000  | -0.288031000 |
| C  | -2.927895000 | 1.824412000  | 1.138929000  |
| C  | -1.994583000 | 0.464380000  | -0.795597000 |
| C  | -3.607767000 | 2.423097000  | -1.035822000 |
| C  | -2.752496000 | 0.746820000  | 1.999280000  |
| C  | -4.117956000 | 2.639217000  | 1.245506000  |
| C  | -1.944385000 | -0.683407000 | 0.143334000  |
| C  | -2.612757000 | -0.084618000 | -2.031384000 |
| C  | -4.537152000 | 3.007176000  | -0.096293000 |
| C  | -4.076804000 | 1.911900000  | -2.237342000 |
| C  | -2.244110000 | -0.538520000 | 1.491466000  |
| C  | -3.745335000 | 0.458845000  | 3.014447000  |
| C  | -5.074774000 | 2.377076000  | 2.230371000  |
| C  | -2.335066000 | -1.887770000 | -0.552221000 |
| C  | -2.752332000 | -1.518020000 | -1.893294000 |
| C  | -3.568334000 | 0.628568000  | -2.747261000 |
| C  | -5.898553000 | 3.099840000  | -0.402029000 |
| C  | -5.487077000 | 1.987932000  | -2.557069000 |
| C  | -2.935116000 | -1.595929000 | 2.198075000  |
| C  | -3.860732000 | -0.984726000 | 3.137924000  |
| C  | -4.884959000 | 1.261982000  | 3.133548000  |
| C  | -6.490674000 | 2.464484000  | 1.908888000  |
| C  | -2.987894000 | -2.921672000 | 0.126696000  |
| C  | -3.809425000 | -2.197404000 | -2.506366000 |
| C  | -4.676698000 | -0.065607000 | -3.372649000 |
| C  | -6.384677000 | 2.578489000  | -1.661083000 |
| C  | -6.893243000 | 2.817416000  | 0.620892000  |
| C  | -5.859700000 | 0.770504000  | -3.257088000 |
| C  | -3.294824000 | -2.773553000 | 1.532940000  |
| C  | -5.104833000 | -1.569418000 | 3.375515000  |
| C  | -6.180829000 | 0.653062000  | 3.375172000  |
| C  | -7.174943000 | 1.396471000  | 2.617946000  |
| C  | -4.092339000 | -3.621543000 | -0.509090000 |
| C  | -4.794022000 | -1.454892000 | -3.263141000 |
| C  | -4.494454000 | -3.266399000 | -1.796686000 |
| C  | -7.682262000 | 1.970153000  | -1.425172000 |
| C  | -7.997978000 | 2.118385000  | -0.013528000 |
| C  | -7.109550000 | 0.190794000  | -3.037656000 |
| C  | -4.593483000 | -3.376795000 | 1.774549000  |
| C  | -5.480432000 | -2.789394000 | 2.678890000  |
| C  | -6.289391000 | -0.734130000 | 3.493050000  |
| C  | -8.235555000 | 0.723243000  | 2.009050000  |
| C  | -5.087020000 | -3.903707000 | 0.512129000  |
| C  | -6.093487000 | -2.058912000 | -3.025597000 |
| C  | -5.908834000 | -3.180264000 | -2.118820000 |
| C  | -8.038591000 | 0.800445000  | -2.099102000 |
| C  | -8.655703000 | 1.091650000  | 0.666564000  |
| C  | -7.228459000 | -1.253385000 | -2.915350000 |
| C  | -6.893701000 | -2.703807000 | 2.359264000  |
| C  | -7.393861000 | -1.433394000 | 2.863093000  |
| C  | -8.347446000 | -0.719688000 | 2.134262000  |
| C  | -6.446038000 | -3.819420000 | 0.204285000  |
| C  | -6.865303000 | -3.449972000 | -1.138275000 |
| C  | -8.724209000 | -0.265758000 | -1.392349000 |
| C  | -9.027280000 | -0.124045000 | -0.036670000 |
| C  | -8.223824000 | -1.535355000 | -1.897090000 |
| C  | -7.367645000 | -3.207651000 | 1.146248000  |
| C  | -8.837711000 | -1.243748000 | 0.870594000  |
| C  | -8.046076000 | -2.611500000 | -1.025207000 |
| C  | -8.357335000 | -2.461684000 | 0.386654000  |
| C  | 2.689396000  | 1.493170000  | 1.860972000  |
| C  | 3.968377000  | 1.374190000  | 2.693305000  |
| C  | 2.807198000  | 2.372719000  | 0.524836000  |
| C  | 2.348575000  | 0.014650000  | 1.655832000  |
| C  | 5.107773000  | 2.111943000  | 2.461623000  |
| C  | 4.083717000  | 0.043847000  | 3.227294000  |
| C  | 4.238244000  | 2.905852000  | 0.273565000  |
| C  | 2.622601000  | 1.535811000  | -0.757421000 |
| C  | 3.084120000  | -0.792650000 | 2.589354000  |
| C  | 1.954588000  | -0.526741000 | 0.453830000  |
| C  | 5.246324000  | 2.895610000  | 1.211837000  |
| C  | 6.407411000  | 1.563014000  | 2.781816000  |
| C  | 5.329176000  | -0.493774000 | 3.572417000  |
| C  | 4.574332000  | 2.776104000  | -1.119515000 |
| C  | 3.578220000  | 1.933237000  | -1.754189000 |
| C  | 2.089977000  | 0.261982000  | -0.793946000 |
| C  | 3.363156000  | -2.137372000 | 2.318600000  |
| C  | 2.260989000  | -1.904131000 | 0.139875000  |
| C  | 6.630475000  | 2.806745000  | 0.796438000  |
| C  | 7.346081000  | 1.983911000  | 1.759659000  |
| C  | 6.521530000  | 0.284831000  | 3.341915000  |
| C  | 5.626149000  | -1.885632000 | 3.271421000  |
| C  | 5.906640000  | 2.716634000  | -1.543698000 |
| C  | 3.942701000  | 1.072064000  | -2.794098000 |
| C  | 2.483771000  | -0.657431000 | -1.844867000 |
| C  | 2.942633000  | -2.706762000 | 1.061649000  |
| C  | 4.664825000  | -2.689120000 | 2.658460000  |
| C  | 2.586453000  | -1.987787000 | -1.272892000 |
| C  | 6.963001000  | 2.733422000  | -0.560664000 |
| C  | 8.360639000  | 1.130310000  | 1.335793000  |
| C  | 7.567321000  | -0.615845000 | 2.891742000  |
| C  | 7.013976000  | -1.960492000 | 2.849103000  |
| C  | 6.290285000  | 1.804056000  | -2.609194000 |
| C  | 3.383058000  | -0.258114000 | -2.839170000 |
| C  | 5.329505000  | 1.000975000  | -3.222770000 |
| C  | 3.982086000  | -3.612508000 | 0.607579000  |
| C  | 5.048788000  | -3.603305000 | 1.596881000  |
| C  | 3.576627000  | -2.867568000 | -1.712266000 |
| C  | 8.007990000  | 1.829560000  | -1.006170000 |
| C  | 8.092860000  | 1.042804000  | -0.077469000 |
| C  | 8.468585000  | -0.202377000 | 1.908407000  |
| C  | 7.384344000  | -2.835699000 | 1.825837000  |
| C  | 7.592625000  | 1.254598000  | -2.275747000 |
| C  | 4.421907000  | -1.166166000 | -3.290044000 |
| C  | 5.627364000  | -0.387633000 | -3.528469000 |
| C  | 4.293660000  | -3.691388000 | -0.751554000 |
| C  | 6.381806000  | -3.673644000 | 1.187177000  |
| C  | 4.518291000  | -2.444921000 | -2.736439000 |
| C  | 8.994310000  | -0.342916000 | -0.379839000 |
| C  | 8.855887000  | -1.112944000 | 0.848080000  |
| C  | 8.323385000  | -2.403443000 | 0.805661000  |
| C  | 7.880070000  | -0.080907000 | -2.565395000 |
| C  | 6.877298000  | -0.918711000 | -3.204225000 |
| C  | 5.678065000  | -3.767550000 | -1.176035000 |
| C  | 6.702374000  | -3.757739000 | -0.226823000 |
| C  | 5.816882000  | -2.997517000 | -2.403693000 |

$$E_g(\text{B3LYP}/6\text{-}31\text{G}(\text{d})) = -4990.91440$$

$$G_g(\text{B3LYP}/6\text{-}31\text{G}(\text{d})) = -4990.12345$$

$$E_s(\text{M06}/6\text{-}311\text{G}(\text{d,p})//\text{B3LYP}/6\text{-}31\text{G}(\text{d})) = -4988.48275$$

$$G_s(\text{M06}/6\text{-}311\text{G}(\text{d,p})//\text{B3LYP}/6\text{-}31\text{G}(\text{d})) = -4987.69180$$

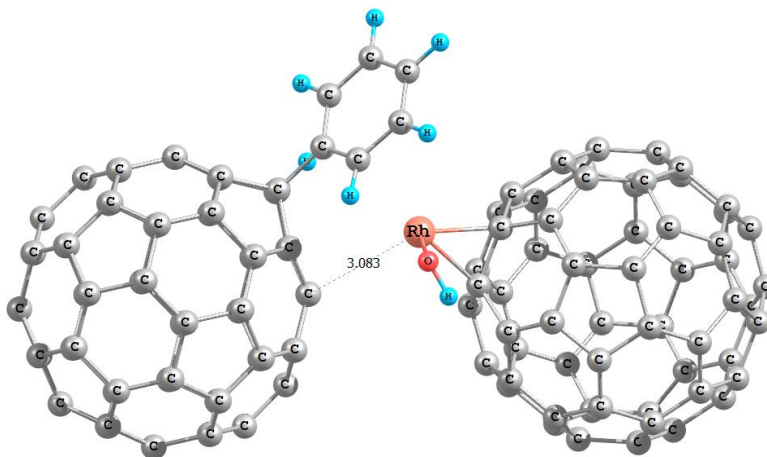

|   |              |              |              |
|---|--------------|--------------|--------------|
| C | 8.595406000  | -0.895319000 | -1.599226000 |
| C | 7.902870000  | -2.973842000 | -0.462946000 |
| C | 6.974390000  | -2.250013000 | -2.631988000 |
| C | 8.036696000  | -2.236227000 | -1.640490000 |
| C | 1.788995000  | 3.536234000  | 0.567404000  |
| C | 1.554314000  | 4.259639000  | 1.743042000  |
| C | 1.068965000  | 3.900181000  | -0.593754000 |
| C | 0.595546000  | 5.278178000  | 1.780324000  |
| H | 2.125166000  | 4.043798000  | 2.641907000  |
| C | 0.086960000  | 4.904116000  | -0.543388000 |
| H | 1.331027000  | 3.485901000  | -1.562221000 |
| C | -0.156870000 | 5.590523000  | 0.648450000  |
| H | 0.435463000  | 5.822418000  | 2.707158000  |
| H | -0.456898000 | 5.148942000  | -1.450093000 |
| H | -0.914104000 | 6.367687000  | 0.689338000  |
| O | -0.503894000 | 2.290754000  | -2.632190000 |
| H | -0.989390000 | 1.581497000  | -3.087698000 |
| H | 1.899401000  | 1.952096000  | 2.466329000  |
